# Supplementary material for: Are depressive symptoms more common among British South Asian patients compared with British White patients with cancer? A cross-sectional survey
Source: PubMed Central journal article supplement — BMJ Open. 2013 Jun 6;3(6):e002650. doi: 10.1136/bmjopen-2013-002650 (PMC3686160; doi:10.1136/bmjopen-2013-002650), 2013-06-06
Supplement: bmjopen-2013-002650.draft_revisions.pdf [file bmjopen-2013-002650.draft_revisions.pdf]

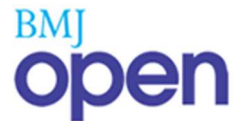

**Increased anxiety and depression among British South Asian compared to British White cancer patients: a longitudinal study**

|                                 |                                                                                                                                                                                                                                                                                                                                                                                                                                                                        |
|---------------------------------|------------------------------------------------------------------------------------------------------------------------------------------------------------------------------------------------------------------------------------------------------------------------------------------------------------------------------------------------------------------------------------------------------------------------------------------------------------------------|
| Journal:                        | <i>BMJ Open</i>                                                                                                                                                                                                                                                                                                                                                                                                                                                        |
| Manuscript ID:                  | bmjopen-2013-002650                                                                                                                                                                                                                                                                                                                                                                                                                                                    |
| Article Type:                   | Research                                                                                                                                                                                                                                                                                                                                                                                                                                                               |
| Date Submitted by the Author:   | 29-Jan-2013                                                                                                                                                                                                                                                                                                                                                                                                                                                            |
| Complete List of Authors:       | Lord, Karen; University Hospitals of Leicester NHS Trust, Oncology<br>Ibrahim, Kausher; University Hospitals of Leicester NHS Trust, Oncology<br>Kumar, Sawan; University Hospitals of Leicester NHS Trust, Oncology<br>Mitchell, Alex; University of Leicester, Cancer Studies and Molecular<br>Medicine<br>Rudd, Nicky; University Hospitals of Leicester NHS Trust, Oncology<br>Symonds, Raymond; University of Leicester, Cancer Studies and Molecular<br>Medicine |
| <b>Primary Subject Heading</b>: | Oncology                                                                                                                                                                                                                                                                                                                                                                                                                                                               |
| Secondary Subject Heading:      | Mental health, Palliative care                                                                                                                                                                                                                                                                                                                                                                                                                                         |
| Keywords:                       | MENTAL HEALTH, Adult oncology < ONCOLOGY, Adult palliative care < PALLIATIVE CARE, Ethnicity, Anxiety, Depression                                                                                                                                                                                                                                                                                                                                                      |
|                                 |                                                                                                                                                                                                                                                                                                                                                                                                                                                                        |

SCHOLARONE™  
Manuscripts

Only

1  
2  
3  
4  
5  
6  
7  
8  
9  
10  
11  
12  
13  
14  
15  
16  
17  
18  
19  
20  
21  
22  
23  
24  
25  
26  
27  
28  
29  
30  
31  
32  
33  
34  
35  
36  
37  
38  
39  
40  
41  
42  
43  
44  
45  
46  
47  
48  
49  
50  
51  
52  
53  
54  
55  
56  
57  
58  
59  
60

# Increased anxiety and depression among British South Asian compared to British White cancer patients: a longitudinal study.

Karen Lord<sup>1</sup>, Kausher Ibrahim<sup>1</sup>, Sawan Kumar<sup>1</sup>, Alex J. Mitchell<sup>1,2</sup>, Nicky Rudd<sup>1</sup>, R Paul Symonds<sup>2</sup>

<sup>1</sup>Department of Oncology, University Hospitals of Leicester NHS Trust, Leicester Royal Infirmary, Leicester LE1 5WW UK

<sup>2</sup>Department of Cancer Studies and Molecular Medicine, University of Leicester, Osborne Building, Leicester, Leicester Royal Infirmary LE1 5WW UK

Corresponding author –

R Paul Symonds  
University of Leicester  
Department of Cancer Studies & Molecular Medicine  
Osborne Building  
Leicester Royal Infirmary  
Leicester  
LE1 5WW  
UK  
Email rps8@le.ac.uk  
Tel 0116 258 6294  
Fax 0116 258 7599

**Key words** Cancer, ethnicity, South Asian, anxiety, depression

**Word count** 3964

## **Abstract**

### **Objectives**

We investigated whether there were ethnic differences in anxiety and depression among British South Asian (BSA) cancer patients compared to British White (BW) patients in Leicestershire. We considered how coping strategies were used and whether physical symptoms affected mood.

### **Design**

Questionnaire-based study of newly diagnosed cancer patients interviewed soon after diagnosis and at 3 and 9 month intervals. The Hospital Anxiety and Depression Scale (HADS), Patient Health Questionnaire (PHQ9), Mini-MAC and Emotion Thermometers (inc distress thermometer) were used. Patients also completed the newly developed Cancer Insight and Denial questionnaire, and Cancer Beliefs/ Physician/Patient Trust questionnaire.

### **Setting**

Leicestershire Cancer Centre, UK.

### **Participants**

94 BSA and 185 BW newly diagnosed cancer patients.

### **Results**

BSA self reported significantly higher rates of depression compared to BW patients longitudinally e.g. (HADS D $\geq$ 8: presentation: BSA 35.1% v BW 16.8% p=0.001; 3 months BSA 45.6% v BW 20.8% p=0.001; 9 months BSA 40.6% v BW 15.3% p=0.004). A similar ethnic difference was detected in rates of anxiety until 9 months (HADS  $\geq$ 8 at presentation BSA 54.3% v BW 36.2% p=0.006; 3 months BSA 47.4% v BW 32.6%; 9 months BSA 40.6% v BW 28.2% p=0.25). BSA patients used maladaptive coping strategies far more than BW patients. In particular hopelessness/helplessness p=0.005, fatalism p=0.0005, avoidance p=0.005 and agreement with the denial statement 'I do not

1 really believe I have cancer'  $p=0.0005$ ) were all more common in BSA patients. An  
2  
3 increase in cancer burden or treatment associated symptoms may have contributed to a  
4  
5 peak in depression at 3 months.  
6  
7

### 8 **Conclusion**

9  
10 High rates of anxiety and depression were present longitudinally among BSA cancer  
11  
12 patients when compared to BW patients.  
13  
14  
15  
16  
17  
18  
19  
20  
21  
22  
23  
24  
25  
26  
27  
28  
29  
30  
31  
32  
33  
34  
35  
36  
37  
38  
39  
40  
41  
42  
43  
44  
45  
46  
47  
48  
49  
50  
51  
52  
53  
54  
55  
56  
57  
58  
59  
60

## Article summary

### Article Focus

- We investigated whether there were differences in anxiety and depression among British South Asian (BSA) cancer patients compared to British White (BW) longitudinally over a 9 month period.
- To try to avoid cultural bias we used 8 questionnaires including HADS and a version of the PHQ-9 developed for India.
- We considered how coping strategies were used and whether physical symptoms affected mood.

### Key Messages

- BSA have twice the self-reported rates of anxiety and depression than BW patients and 5 times the incidence of severe depression.
- These differences persist for 9 months after presentation.
- BSA patients used maladaptive coping strategies far more than BW patients.

### Strengths and Limitations

This is the first comparison of how BSA and BW patients cope with cancer. We have used multiple assessment tools including a version of the PHQ-9 developed for India. We have demonstrated statistically very significant differences in the rates of anxiety and depression between the two groups and marked differences in coping style.

BSA clinical staff were involved in the study. In spite of this we had difficulty recruiting BSA patients and retention, especially by 9 months was low. Changes in mood between the 3 data collection points are not represented. It is also likely that the rates of anxiety and depression are under-reported since anecdotally those who were most distressed often did not feel able to participate in this study.

## Introduction

Depression is one of the strongest determinants of health related quality of life and it also influences medical care and participation in treatment.[1, 2] It may also be linked with other serious outcomes including mortality.[3] The point prevalence of major depression at any time in the first two years following a cancer diagnosis is 14.9% via DSMIV criteria.[4] This is two to four times that observed in the general population using equivalent criteria.[5] An under researched area is the incidence of psychological distress including anxiety and depression in ethnic minority patients. Some research suggests that UK ethnic minorities may be more vulnerable to mental illness within the general population than the majority host population[6] leaving the largely unproven implication that they also suffer more distress when diagnosed with cancer. However ethnic minorities may be less likely to receive high quality care.[7, 8] Inequalities in access to care, receipt of treatment and mortality are particularly striking among ethnic minorities, the elderly and those with mental ill health on both sides of the Atlantic.[9-11] Removing such disparities is a priority both of UK [12, 13] and US government.[14]

The UK British South Asian (BSA) population is a large ethnic minority. The city of Leicester has one of the highest concentrations of this population accounting for approximately 33%, predominantly of Gujarati decent originally from western India. A previous pilot study showed a significantly higher incidence in symptoms of depression amongst BSA patients in Leicester and local counties compared to British White (BW) patients via HADS D  $\geq 10$  (BSA 20.7%; BW 10.4%  $p=0.001$ ).[15] Anxiety and depression were associated with certain coping styles particularly the use of denial in both BSA and BW patients but was employed more frequently by BSA patients.

1 The findings of our pilot study were consistent with the few publications reporting the  
2 incidence of depression or distress in ethnic minority cancer patients. The largest is a  
3 meta-analysis of 21 papers which found that US Hispanic patients were significantly more  
4 distressed ( $p=0.0001$ ) and depressed ( $p=0.04$ ) than the majority population.[16]  
5  
6  
7  
8  
9

10  
11  
12 Similar findings were reported from Canada with more distress amongst ethnic minorities  
13 (E and SE Asia, South Asian, Aboriginals) compared to the majority population  
14 (European, Canadian, British  $p=0.0001$ ). Greater distress was also found among those  
15 with lower income ( $p=0.001$ ).[17]  
16  
17  
18  
19  
20

21  
22  
23 Here we aimed to address how the UK's largest ethnic minority population (BSA) cope  
24 with cancer in comparison to the host population by analysing data from a sample of  
25 those attending the Leicestershire Cancer Centre. We report the longitudinal incidence of  
26 anxiety and depression in both groups. Initial assessment took place as soon as possible  
27 after diagnosis and 3 and 9 months later. Coping styles were also examined to determine  
28 if patterns of maladaptive coping changed with time. Greater understanding of how  
29 patients from ethnic minorities cope with cancer is a pre-requisite to eliminating  
30 inequalities.  
31  
32  
33  
34  
35  
36  
37  
38  
39  
40  
41  
42

## 43 **Methods**

### 44 **Hypotheses**

45  
46  
47  
48 On the basis of our literature review and pilot studies we hypothesized that longitudinally  
49 more BSA cancer patients would self report symptoms of anxiety and depression than  
50 BW patients. We further hypothesized that a greater use of maladaptive coping  
51 strategies would reflect higher rates of anxiety and depression.  
52  
53  
54  
55  
56  
57  
58  
59  
60

### Study procedures

279 patients, who were aware they had cancer, were recruited at the Leicestershire Cancer Centre between September 2007 and January 2010 at their first or second appointment. Prior to their attendance eligible patients were sent a letter outlining the study and inviting them to participate. Consent was sought requesting patients complete three sets of questionnaires in writing, the first as soon as possible, then at 3 months and 9 month intervals. Patients were recruited by either an English speaking clinical nurse specialist or one of two radiographers, who between them spoke English, Gujarati and Hindi.

### Questionnaires

Patients completed the Hospital Anxiety and Depression Scale (HADS) [18] and The Emotion Thermometers [19] which incorporates the Distress Thermometer [20] alongside thermometers for anxiety (Anx T) and depression (Dep T). All are validated but were not initially available in Gujarati or Hindi. Therefore we undertook a translation via the back to back method.[21] A version of the Patient Health Questionnaire (PHQ-9) which was already validated into Gujarati and Hindi having been adapted for use in India was the third questionnaire used.[22] Several tools were used to address the concern that some tools are ethnically biased.

Coping strategies were assessed via the Mini-MAC scale [23] and the locally developed Cancer Insight and Denial questionnaire (CIDQ). The CIDQ included question 38 from the original MAC questionnaire to elicit the use of denial. The Brief Illness Perception Questionnaire [24] and the Physician/Patient Trust/ Cancer Beliefs Questionnaire [25] considered how patients interpreted cancer. The vast majority of participants chose to



1 complete the first questionnaires at home, returning them by post. Subsequent  
2  
3 questionnaires were posted to participants.  
4  
5  
6  
7

### 8 **Statistical analysis**

9  
10 We used the following scales and cut-off thresholds. HADS-A and HADS D 7v8, ET  
11  
12 Thermometers 3v4 and PHQ-9 9v10. In addition cut-off scores of HADS  $\geq 11$  and PHQ-9  
13  
14  $\geq 15$  and  $\geq 20$  were used to indicate high severity for depressive symptoms. Graphs  
15  
16 denote 95% confidence intervals. Summary scores for selected coping strategies were  
17  
18 from the Mini-MAC and the denial indicators in the CIDQ questionnaire. Reference was  
19  
20 made to individual indicators. Longitudinal data at presentation and at 3 and 9 months is  
21  
22 reported.  
23  
24  
25  
26  
27

28 Computation of frequencies, percentages and arithmetic median was conducted to  
29  
30 identify patterns in the data. Mann Whitney tests for continuous variables detected  
31  
32 differences between the ethnic groups and the direction of these relationships. Chi<sup>2</sup>  
33  
34 described the relationship between categorical variables. The extent to which patients  
35  
36 used each coping strategy and how its use changed longitudinally is described.  
37  
38 Associations between each strategy and anxiety and depression are reported. Analysis  
39  
40 was performed via SPSS v 18.  
41  
42  
43  
44  
45

### 46 **Results**

47  
48 94 BSA patients were recruited with approximately 33% born in Africa. 185 BW patients  
49  
50 were recruited. Several cancer sites are represented. The largest cohort was 114 breast  
51  
52 cancer patients. The educational attainment, religion and place of birth record were self  
53  
54 reported by participants. The demographic characteristics of this sample showed  
55  
56 significant differences between ethnic groups in terms of their socio-economic status and  
57  
58  
59  
60

1  
2  
3  
4  
5  
6  
7  
8  
9  
10  
11  
12  
13  
14  
15  
16  
17  
18  
19  
20  
21  
22  
23  
24  
25  
26  
27  
28  
29  
30  
31  
32  
33  
34  
35  
36  
37  
38  
39  
40  
41  
42  
43  
44  
45  
46  
47  
48  
49  
50  
51  
52  
53  
54  
55  
56  
57  
58  
59  
60

educational attainment. These details and the patient’s sex, age, cancer site and treatment intent are listed in Table 1.

For peer review only

**Table 1: Demographics**  
 \* Index Multiple Deprivation Scale (Office National Statistics,2007)

|                                                                     | Total (%)   | British South Asian (BSA) | British White (BW) | p value                                                     |
|---------------------------------------------------------------------|-------------|---------------------------|--------------------|-------------------------------------------------------------|
| <b>Number</b>                                                       | 279         | 94                        | 185                |                                                             |
| Male                                                                | 88 (31.5%)  | 25 (26.6%)                | 64 (34.6%)         | Chi <sup>2</sup><br>p=0.223                                 |
| Female                                                              | 190 (68%)   | 69 (73.4%)                | 121 (65.4%)        |                                                             |
| <b>Age</b><br>median (Inter Quartile Range)                         |             | 57.1 (19)                 | 61 (14)            | Wilcoxon<br>rank sum<br>test(WRST)<br>Z=-14.480<br>p=0.0005 |
| <b>IMDS (1-20)*</b><br>Median (IQR)                                 |             | 6.5 ( IQR 4,10)           | 16(11,18)          | WRST<br>Z=-14.435<br>p=0.0005                               |
| <b>Educational Attainment</b>                                       |             |                           |                    | Chi <sup>2</sup><br>p=0.0005                                |
| No formal education                                                 | 30 (10.7%)  | 27 (29.7%)                | 3 (1.7%)           |                                                             |
| Junior school (up to 11)                                            | 8 (2.8%)    | 4 (4.4%)                  | 4 (2.2%)           |                                                             |
| Senior school (15-16)                                               | 97 (34.7%)  | 16 (17.8%)                | 81 (44.8%)         |                                                             |
| Sixth form (17-18)                                                  | 22 (7.8%)   | 11 (12.1%)                | 11 (6.1%)          |                                                             |
| University or college                                               | 115 (41.2%) | 33 (36.3%)                | 82 (45.3%)         |                                                             |
| <b>Religion</b>                                                     |             |                           |                    |                                                             |
| Christian                                                           | 148 (53%)   | nil                       | 148 (80%)          |                                                             |
| Muslim                                                              | 24 (9%)     | 24 (25.5%)                | nil                |                                                             |
| Hindu                                                               | 50 (18%)    | 50 (53.2%)                | nil                |                                                             |
| Sikh                                                                | 16 (6%)     | 16 (17%)                  | nil                |                                                             |
| Other                                                               | 4 (1%)      | 1 (1.06%)                 | 3 (1.6%)           |                                                             |
| None                                                                | 37 (13%)    | nil                       | 34 (18.4%)         |                                                             |
| <b>Interview Language</b>                                           |             |                           |                    |                                                             |
| English                                                             | 267 (96%)   |                           |                    |                                                             |
| Gujarati                                                            | 11 (4%)     |                           |                    |                                                             |
| Urdu                                                                | 1 (0.3%)    |                           |                    |                                                             |
| <b>Place of birth</b>                                               |             |                           |                    |                                                             |
| UK                                                                  | 195 (70%)   | 13 (14%)                  | 182 (98.4%)        |                                                             |
| British Forces overseas                                             | 2 (0.7%)    | nil                       | 2 (1.08%)          |                                                             |
| USA                                                                 | 1 (0.3%)    | nil                       | 1 (0.52%)          |                                                             |
| Africa                                                              | 31 (11.1%)  | 31 (33%)                  | nil                |                                                             |
| Indian sub continent                                                | 50 (17.9%)  | 50 (53%)                  | nil                |                                                             |
| <b>Diagnosis</b>                                                    |             |                           |                    |                                                             |
| Breast                                                              | 41%         | 34 (36.2%)                | 80 (43.2%)         |                                                             |
| Colorectal                                                          | 16%         | 15 (16%)                  | 30 (16.2%)         |                                                             |
| Gynaecological                                                      | 12%         | 19 (20.2%)                | 15 (8.1%)          |                                                             |
| Prostate                                                            | 8%          | 3 (3.2%)                  | 20 (10.8%)         |                                                             |
| Lung                                                                | 7.0%        | 6 (6.4%)                  | 13 (7.0%)          |                                                             |
| Other                                                               | 15%         | 17 (18%)                  | 26 (14.6%)         |                                                             |
| <b>Type of treatment</b>                                            |             |                           |                    | Chi <sup>2</sup><br>p=0.966                                 |
| Radical                                                             | 188 (67.4%) | 64 (68.1%)                | 124 (67.4%)        |                                                             |
| Palliative                                                          | 91(32.6%)   | 30 (31.9%)                | 61 (33%)           |                                                             |
| <b>Time from diagnosis to first interview (wks)</b><br>Median (IQR) | 7(3)        | 8(3)                      | 6(3)               | WRST<br>Z=-14.506<br>P=0.0005                               |

### **Anxiety and depression early after diagnosis**

All three assessment tools showed approximately double the incidence of depression in BSA patients compared to BW patients (Fig 1a). Severe depression was also more common in the BSA groups as demonstrated using a higher HADS score  $\geq 11$  (BSA 23/94 (24.5%) BW 11/185 (5.9%)  $p=0.001$ ). A similar trend was seen using a higher PHQ-9 cut-off score ( $\geq 15$ ) BSA 13/85 (15%) BW 10/173 (5%)  $p=0.04$ . Again significantly higher levels of anxiety were seen in BSA patients (HADS-A  $\geq 8$  BSA 54.3% v BW 36.2%  $p=0.006$ ) especially severe anxiety (HADS-A  $\geq 11$  BSA 34% v BW 18.9%  $p=0.008$ ). The ethnic difference was reproduced via the AnxT $\geq 4$  albeit inclusive of more patients (BSA 67.5% v BW 52.2%  $p=0.02$ ) (Fig 1b).

### **Longitudinal trends in anxiety and depression**

All tools indicated how more vulnerable BSA patients were in contrast to BW patients. HADS D  $\geq 8$  suggested significantly higher rates of depressive symptoms among BSA patients longitudinally than BW patients (Fig 1c). All three assessment tools indicated a slight decrease in depressive symptoms among BSA patients at 3 months. Depression rates had not fallen lower than those at presentation by 9 months although the ethnic difference remained (Fig 1d). Rates of anxiety appeared to subside for both ethnic groups over time although more BSA patients remained anxious than BW patients at 3 months (HADS A  $\geq 8$   $p=0.04$ ) (Fig 1e). The difference had gone by 9 months ( $p=0.254$ ). The Anxiety Thermometer  $\geq 4$  echoed this trend (3 months ( $p=0.13$ ), 9 months ( $p=0.17$ )) (Fig 1f).

### **Influence of deprivation**

Since socio-economic deprivation is closely associated with being a member of an ethnic minority we considered the extent to which deprivation influenced the strength of the relationship between ethnicity and anxiety and depression.

Although there was a strong association between ethnicity and deprivation (MW  $r=0.503$ ,  $p=0.0005$ ), the latter had minimal influence on the strength of the relationship between ethnicity and depression when comparing Pearson product-moment correlations (PCC) with partial correlation calculations. (HADS D:  $-.274$ ;  $p=.0005$ ) partial correlation ( $-.235$ ,  $p=0.001$ ) and via PHQ-9 (PCC  $-.257$ ,  $p=0.0005$ ) partial correlation ( $-.208$ ,  $p=0.001$ ). There was a weak association between ethnicity and anxiety (HADS A  $-.147$   $p=0.014$ ). Although deprivation did influence the strength of that relationship to the extent that it became insignificant ( $-.093$   $p=0.123$ ), the difference between the correlations was minimal, results supported by findings via Anx-T (PCC  $-.087$   $p=0.158$ ) partial correlation ( $-.083$ ,  $p=0.179$ ).

### **Coping Strategies**

BSA patients used maladaptive coping strategies more than BW patients particularly early after diagnosis when they were associated with higher rates of anxiety and depression.

### **Hopelessness/ helplessness (Mini MAC)**

*"its an awful thing to happen....feeling hopeless"*

## BSA patient soon after diagnosis No.16

Although initially the majority of patients did not express helplessness nor hopelessness, BSA patients were far more likely to do so ( $p=0.0005$ ). For example, more BSA patients than BW patients agreed with the statement 'I feel completely at a loss about what to do' (BSA 31 (33%); BW 23(12.4%)  $p=0.0005$ ). Across the study period BSA patients had higher helplessness/hopelessness scores than BW patients although its use decreased over time for both groups (Fig 2a). Helplessness/hopelessness is sometimes considered to be a substitute for depression so it was not surprising that over time as one sample more patients who felt helplessness/hopelessness, acknowledged depressive symptoms (MW: PHQ-9 10v11/HADS D 7v8  $p=0.0005$ ). Helplessness/hopelessness was also associated with a higher incidence of anxiety (MW: HADS A 7v8,  $p=0.0005$ ).

**Anxiety preoccupation**

*"Cancer has totally changed my life. I am worried, anxious about my treatment and what lies ahead as this is the second occasion I am going through this"*

BSA No.103.

There was a negligible ethnic difference in the use of anxiety preoccupation. Over time this strategy was used less (Fig 2b). Individual indicators suggested that BW patients appeared far more apprehensive than BSA patients (BSA 47/93 (50.5%); BW 135/185 (73%)  $p=0.0005$ ), more upset about having cancer

1  
2  
3 (BSA 58/94 (61.7%); BW 149/185 (80.5%)  $p=0.001$ ) and more likely to describe  
4  
5 themselves as a 'little frightened' (BSA 65/94 (69.1%), BW 149/185 (80.5%)  
6  
7  $p=0.048$ . It appears paradoxical therefore that BSA patients self reported  
8  
9 greater anxiety via a single indicator (BSA 46/94 (48.9%) BW 60/185 (32.4%)  
10  
11  $\text{Chi}^2 p=0.011$ ). Longitudinally there remained little ethnic difference in patients  
12  
13 who were preoccupied with anxiety (3 months  $p=0.751$ , 9 months  $p=0.926$ ).  
14  
15

16  
17  
18 Anxiety preoccupation was strongly associated with depression (HADS D and  
19  
20 PHQ-9  $p=0.0005$ ). Given the overlap of phenomena between anxiety  
21  
22 preoccupation (the strategy) and anxiety (the outcome) there was predictably a  
23  
24 strong association between them (HADS A  $r=0.63$ ,  $p=0.0005$ ). These patients  
25  
26 were also at greater risk of becoming depressed longitudinally (PHQ-9:  
27  
28 presentation  $p=0.0005$ , 3 months  $p=0.0005$ , 9 months  $p=0.0005$ ).  
29  
30  
31

### 32 33 34 **Cognitive avoidance**

35  
36 Cancer is "*...something that I put to the back of my mind and don't let it*  
37  
38 *interfere with my day to day life*" BW No.118  
39  
40

41  
42  
43 Initially BSA patients used cognitive avoidance to cope more than BW patients  
44  
45 (MW:  $p=0.0005$ ) (Fig 2c). For example, 'I deliberately push all thoughts of  
46  
47 cancer out of my mind' (BSA 61/93 (65.6%); BW 63/185 (34.4%),  $p=0.0005$ ).  
48

49  
50 Over time this ethnic difference continued but was only notable at presentation  
51  
52 as illustrated by a comparison of median scores (Fig 2c). Soon after diagnosis,  
53  
54 as one sample those who used cognitive avoidance were more likely to have  
55  
56 symptoms of depression (MW: PHQ-9  $p=0.007$ ; HADS D  $\geq 8$   $p=0.001$ ; Dep.T  $\geq 4$   
57  
58  
59  
60

1  
2  
3 p=0.002) and anxiety (HADS A  $\geq 8$  p=0.0005/ Anx.T.  $\geq 4$  p= 0.002). Over time  
4  
5 avoidant patients continued to be anxious (HADS A 3 months p=0.016, 9  
6  
7 months p=0.026) but not depressed (HADS D 3 months p=0.2, 9 months 0.14).  
8  
9

### 10 11 12 **Fighting Spirit**

13  
14 (I see cancer) *“as a challenge...a temporary state....a hurdle to get over”*

15  
16 BW patient No.172

17  
18 *“It means I have a fight on my hands but I’m determined to get better”*

19  
20  
21 BW No.354

22  
23  
24  
25 A large number of patients in both ethnic groups approached their illness with a  
26  
27 ‘fighting spirit’ (Fig 2d). For example, ‘I am determined to beat this disease’  
28  
29 (BSA 85/93 (91.4%) (n=93); BW 170/185 (91.9%) (n=185) p=1.0). There was  
30  
31 little ethnic difference in the extent to which patients used this coping strategy  
32  
33 (MW presentation p=0.47, 3 months p=0.57, 9 months p=0.2). Furthermore  
34  
35 there was no consistent association with anxiety (HADS A p=0.8, 3 months  
36  
37 p=0.4, 9 months p=0.6) or depression as one sample for example (PHQ-9  
38  
39 presentation p=0.3, 3 months p=0.2, 9 months p=0.7).  
40  
41  
42  
43  
44

### 45 46 **Fatalism**

47  
48 *“It’s horrible. Why me? My mum died from cancer. My sisters have cancer. Why*  
49  
50 *is this happening? I wish I’d never woken up after my operation”* BSA No.125  
51

52  
53  
54 At presentation more BSA patients were fatalistic when diagnosed with cancer  
55  
56 than BW patients (MW: p=0.0005) however this was largely based on one of 5  
57  
58  
59  
60



1  
2  
3 Mini MAC indicators, 'I've put myself in the hands of God' (BSA 71/94 (75.5%);  
4  
5 BW 60/185(32.4%)  $p=0.0005$ ). There was a gradual decrease in fatalism in  
6  
7 both ethnic groups by 9 months although it persisted among BSA patients (Fig  
8  
9 2e). Those who were fatalistic were more likely to experience depressive  
10  
11 symptoms via two tools (MW PHQ-9  $p= 0.003$ ; HADS D $\geq$ 8  $p= 0.024$ ) but not by  
12  
13 the Dep T.  $\geq$ 4 ( $p=0.101$ ). Anxiety too was associated with fatalism (HADS A  
14  
15 MW;  $p=0.011$ ). Again AnxT did not support these findings ( $p= 0.164$ ).  
16  
17  
18  
19

### 20 21 **Insight and Denial (CIDQ)**

22  
23 *"I'm not ill"*

24  
25 Written at the top of an uncompleted BIPQ by a patient having chemotherapy  
26  
27 for breast cancer following surgery. BW No.127 at presentation  
28  
29

30  
31  
32 *"...part of me still feels there is nothing wrong with me and this is happening to*  
33  
34 *someone else. This is presumably my way of handling it all."* BW No.311 at 9  
35  
36 months  
37

38  
39  
40 Of those who used denial as a means of coping BSA patients were  
41  
42 overrepresented, most notably soon after diagnosis ( $p=0.001$ ). The ethnic gap  
43  
44 remained longitudinally (Fig 2f). Of the three tools assessing depression only  
45  
46 PHQ-9 indicated an association between denial and depression albeit weakly  
47  
48 (MW:  $p= 0.039$ ). There was a similar difficulty in generating firm conclusions  
49  
50 about the relationship between denial and anxiety. The median scores using  
51  
52 HADS A and AnxT suggested a tendency towards being more anxious when  
53  
54 using denial.  
55  
56  
57  
58  
59  
60

1  
2  
3  
4  
5 To facilitate comparisons with Roy's 2005 [15] study, analysis of the single  
6 indicator 'I don't really believe I have cancer' originating from the MAC  
7 questionnaire was repeated. At presentation 229/278 patients (82%) accepted  
8 the reality of their diagnosis by disagreeing with the statement. Of the 27  
9 patients who didn't believe that they had cancer, more were BSA (BSA 19/93  
10 (20.2%); BW 8/185 (4.3%),  $p=0.0001$ ). Of interest is that 23 patients agreed  
11 with this statement 'sometimes' (BSA 12 (52.2%); BW 11 (47.8%)). There was  
12 a strong trend towards BSA patients who denied their diagnosis to be more  
13 anxious and depressed but sample numbers were too low to assess statistically  
14 at 9 months (Fig 2g).  
15  
16  
17  
18  
19  
20  
21  
22  
23  
24  
25  
26  
27  
28

29 We considered whether causes of distress via the distress thermometer  
30 checklist explained ethnic differences in anxiety and depression. Cancer  
31 treatments offered to both groups were similar so did not influence findings.  
32 Critically BSA patients experienced more distress from physical symptoms of  
33 illness and treatment than BW patients. In 13 out of 17 symptoms BSA patients  
34 returned higher scores than BW patients at presentation. For example, pain  
35 (BSA 51/83 (58%); BW 59/180 (32.8%)  $p=0.0001$ ), mouth sores (BSA 21/88  
36 (24.1%) BW 12/179 (6.7%)  $p=0.0001$  and fevers (BSA 18/87 (20.7%); BW  
37 5/177(2.8%)  $p=0.0001$ ). At 3 months significantly higher percentages of BSA  
38 patients reported pain, mouth sores, nausea, skin, washing and dressing and  
39 getting around as causes for distress which were not reflected in BW patients.  
40 By 9 months differences had narrowed with the exception of pain (BSA 19/31  
41 61.3% v BW 41/121 (33.9%)  $p=0.009$ ).  
42  
43  
44  
45  
46  
47  
48  
49  
50  
51  
52  
53  
54  
55  
56  
57  
58  
59  
60

## **Discussion**

To our knowledge a comparison of how BSA and BW patients cope with cancer has not previously been reported. It should be of major concern to health care policy makers in the UK that this study provides evidence that there is a higher prevalence of anxiety and depression among BSA patients soon after the cancer diagnosis than BW patients. The percentages vary depending on the assessment tool used but all showed the same trend. BSA rates for depression were twice that of BW patients. For example on the HADS-D scale 35.1% of BSA compared to 16.8% of BW patients ( $p=0.001$ ) had at least moderate depression (score  $\geq 8$ ). This is a critical finding since this is almost 6 times higher than reported within the UK general population (6%).<sup>[26]</sup> Depression rates for BW patients (PHQ-9 18.3%, HADS D $\geq 8$  16.8%) were similar to those reported in a recent meta-analysis of cancer patients (16.3%), being approximately 2.5 times higher than in the general population.<sup>[4]</sup> What is most striking is the incidence of severe depression in BSA patients which is reflected in their HAD-D score  $\geq 11$  (BSA 24.5% v BW 5.9%  $p=0.0001$ ). This was confirmed on a version of the PHQ-9 $\geq 10$  developed for India (35.3% BSA v 18.3% BW  $p=0.05$ ). However differences were not just confined to depression. Significantly higher levels of anxiety were seen in BSA patients (HADS A $\geq 8$  BSA 54.3% v 36.2% BW  $p=0.006$ ) including severe anxiety (HADS A  $\geq 11$  BSA 34%v18.9%  $p=0.008$ ). Patients also exhibited more anxiety with rates far higher than in the general population (DSMIV 5-15%).<sup>[27]</sup>

1  
2  
3 These findings supported trends in other studies, notably a pilot study. Using  
4 the cut-off (HADS  $\geq 10$ ), Roy [15] reported BSA 20.7% v BW 10.4% ( $p=0.001$ )  
5 had severe depressive symptoms. With a slightly higher cut-off ( $\geq 11$ ) our study  
6 findings at presentation again pointed to a significant difference (BSA 34% v  
7 BW 18.9%  $p=0.008$ ). [15] These concur with other reports which suggest that  
8 ethnic minority cancer patients experience more psychological distress than  
9 patients from host populations. [16, 17, 28, 29] Ethnic minorities are however  
10 not heterogeneous. There are for example variations in baseline common  
11 mental disorders in the UK among some BSA groups. [6] However over 50% of  
12 our BSA sample were Indian Hindus.  
13  
14  
15  
16  
17  
18  
19  
20  
21  
22  
23  
24  
25  
26

27 What is very interesting is that the HADS-D, PHQ-9 and DepT showed higher  
28 levels of depression in both ethnic groups at 3 months after presentation, this  
29 being steeper among BSA patients. Although rates fell back, BSA consistently  
30 reported higher rates of depression than BW patients longitudinally. The  
31 decline in the prevalence of anxiety was consistent in both groups over time but  
32 the ethnic difference persisted. These findings confirmed our first hypothesis.  
33  
34  
35  
36  
37  
38  
39  
40  
41  
42

43 A counter intuitive finding in this study is the similarity of anxiety and depression  
44 in patients being treated with curative intent (radical) and palliative patients.  
45 Although there was a poorer rate of return of questionnaires at 3 and 9 months  
46 the ratio of radical and palliative patients remained the same (HADS D 7v8  
47 presentation  $p=0.08$ , 3 months  $p=0.58$ , 9 months  $p=1.0$ ). In fact this finding is  
48 consistent with a recent meta-analysis. [4]  
49  
50  
51  
52  
53  
54  
55  
56  
57  
58  
59  
60

1  
2  
3 Previously we had considered whether there were differences in knowledge  
4 about cancer and levels of trust in doctors between BSA and BW patients. High  
5 levels of trust were found in both groups and differences in knowledge about  
6 cancer did not explain the increased psychological morbidity.[25, 30] However  
7 of particular interest were the marked differences in coping styles between the  
8 two groups of patients.  
9  
10  
11  
12  
13  
14  
15  
16  
17

18 At presentation the rates of fatalism helplessness/hopelessness and domains of  
19 denial were far higher among BSA patients and there was a strong correlation  
20 between these coping strategies and the incidence of anxiety and depression in  
21 both ethnic groups. Helplessness/hopelessness is strongly associated with  
22 anxiety and depression globally, findings replicated in this study.[31-37] A  
23 similar pattern was seen in the use of cognitive avoidance. Fatalism too was  
24 associated with higher levels of anxiety and depression as demonstrated on  
25 both the PHQ-9 and HADS which supports research from India [38, 39] and  
26 maladaptive behaviours in the UK.[40, 41]  
27  
28  
29  
30  
31  
32  
33  
34  
35  
36  
37  
38  
39

40 In our previous study [15] denial was significantly related to depression in both  
41 BW and BSA patients. BSA patients were far more likely to agree with the  
42 statement in the MAC questionnaire (Question 38) 'I don't really believe I have  
43 cancer'. In this study a minority of patients denied their diagnosis but again it  
44 was more common among BSA patients via the same indicator until 9 months  
45 (MW presentation p=0.0005, 3 months p=0.001, 9 months p=0.2). Initially this  
46 was strongly associated with anxiety and depression however the sample  
47 numbers were too small to consider longitudinal associations.  
48  
49  
50  
51  
52  
53  
54  
55  
56  
57  
58  
59  
60

1  
2  
3  
4  
5 What is puzzling is that although BSA patients remained more depressed and  
6  
7  
8  
9  
10  
11  
12  
13  
14  
15  
16  
17  
18  
19  
20  
21  
22  
23  
24  
25  
26  
27  
28  
29  
30  
31  
32  
33  
34  
35  
36  
37  
38  
39  
40  
41  
42  
43  
44  
45  
46  
47  
48  
49  
50  
51  
52  
53  
54  
55  
56  
57  
58  
59  
60

What is puzzling is that although BSA patients remained more depressed and anxious than BW patients longitudinally, by 3 and 9 months the use of coping strategies did not explain this. With the exception of helplessness/hopelessness at 3 months ( $p=0.043$ ) the ethnic differences in use of coping strategies are insignificant but the trend towards higher anxiety and depression among BSA patients remained. Even taking into account a lag time for the alleviation of symptoms of anxiety and depression after less use of maladaptive coping, there remains an incomplete explanation as to why more BSA patients in particular remain so distressed. Our second hypothesis was therefore only partially confirmed. A retrospective audit into referral to psycho oncology or prescribing patterns in the two groups did not suggest a difference that could account for this.

We considered whether physical symptoms explained this ethnic gap. BSA patients experienced significantly more pain, nausea, skin concerns, mouth sores, tingling and feeling swollen at 3 months, which may account for the peak in depression particularly among BSA patients at that time but the ethnic difference in anxiety and depression persisted with only one symptom (pain) indicating an ethnic difference at 9 months. The somatisation of physical symptoms notwithstanding, this is insufficient evidence to explain the difference.

We wonder whether greater involvement of the General Practitioner (GP) at a very early stage may reduce anxiety and depression in BSA patients given the difference between BW and BSA patients' preferences for the source of

1  
2  
3 information about their cancer. In an earlier study 66.2% of BSA compared to  
4  
5 5.1% BW wrote that they would prefer to receive their cancer diagnosis from  
6  
7 their GP ( $p=0.001$ ).<sup>[42]</sup> In this study 49.5% of BSA patients' preferred source of  
8  
9 sensitive information was their GP compared to 16.9% of BW patients  
10  
11 ( $p=0.0001$ ). The main reason why the GP is the preferred source of information  
12  
13 is that the majority of BSA patients prefer to discuss their illness in their mother  
14  
15 tongue.<sup>[42]</sup> Of note is that 89% of BSA patients in this series were registered  
16  
17 with a BSA GP.  
18  
19  
20  
21  
22

### 23 **Recommendations**

24  
25  
26  
27 The nature of coping strategies among BSA patients in the first few months after  
28  
29 diagnosis requires investigation, the aim being to reduce the associated distress  
30  
31 as early as possible along the cancer trajectory. Further investigation into the  
32  
33 role of the GP in partnership to support patients, particularly for BSA patients, is  
34  
35 advised.  
36  
37  
38  
39

40  
41 This study provides evidence of worryingly high levels of anxiety and depression  
42  
43 among the largest ethnic minority in the UK. Further investigation is required if  
44  
45 this disparity is to be reduced.  
46  
47  
48  
49  
50  
51  
52  
53  
54  
55  
56  
57  
58  
59  
60

## References

1. Kennard BD, Stewart SM, Olvera R, et al. Nonadherence in Adolescent Oncology Patients: Preliminary Data on Psychological Risk Factors and Relationships to Outcome. *J Clin Psychol Med S* 2004;**11**:1:31-39. DOI 0.1023/B:JOCS.0000016267.21912.74
2. Steginga SK, Campbell A, Ferguson M, et al. Socio-demographic, psychosocial and attitudinal predictors of help seeking after cancer. *Psychooncology* 2008;**17**:997-1005. DOI 10.1002/pon.1317
3. Satin JR, Linden W, Phillips MJ. Depression as a predictor of disease progression and mortality in cancer patients: a meta-analysis. *Cancer* 2008;**115**:5349-5361.
4. Mitchell AJ, Chan M, Bhatti H, et al. Prevalence of depression, anxiety, and adjustment disorder in oncological, haematological, and palliative-care settings: a meta-analysis of 94 interview-based studies. *Lancet Oncol* 2011;**12**:160-174. DOI:10.1016/S1470-2045(11)70002-X
5. Hinz A, Krauss O, Hauss JP, et al. Anxiety and depression in cancer patients compared with the general population. *Eur J Cancer Care* 2010;**19**:522-529. DOI 10.1111/j.1365-2354.2009.01088.x



- 1  
2  
3 6. Weich S, Nazroo J, Sproston K, et al. Common mental disorders and  
4 ethnicity in England: the EMPIRIC study. *Psychol Med* 2004;**34**:1543-  
5 1551.  
6  
7  
8  
9
- 10  
11 7. Shavers VL, Brown ML. Racial and ethnic disparities in the receipt of  
12 cancer treatment. *J Natl Cancer Inst* 2002;**94**:334-57.  
13  
14  
15  
16  
17
- 18 8. Ward E, Jemal A, Cokkinides V, et al. Cancer disparities by race/ethnicity  
19 and socioeconomic status. *CA Cancer J Clin* 2004;**54**:78-93.  
20  
21  
22  
23  
24
- 25 9. Goss E, Lopez AM, Brown CL, et al. American Society of Clinical  
26 Oncology policy statement: disparities in cancer care. *J Clin Oncol*  
27 2009;**27**:2881-2885. DOI 10.1200/JCO.2008.21.1680  
28  
29  
30  
31  
32  
33
- 34 10. US Department of Health and Human Services (2011) President's  
35 Cancer Panel: American's demographic and cultural transformations:  
36 Implications for cancer Washington DC 1-100  
37  
38  
39  
40  
41  
42
- 43 11. All party parliamentary group on cancer (2009) Report of the all party  
44 parliamentary group of cancer's enquiry into inequalities in cancer  
45 available at [www.appq-cancer.uk](http://www.appq-cancer.uk)  
46  
47  
48  
49  
50
- 51 12. Department of Health (2007), Cancer Reform Strategy available at  
52 [http://www.dh.gov.uk/prod\\_consum\\_dh/groups/dh\\_digitalassets/documen](http://www.dh.gov.uk/prod_consum_dh/groups/dh_digitalassets/documents/digitalasset/dh_081007.pdf)  
53 [ts/digitalasset/dh\\_081007.pdf](http://www.dh.gov.uk/prod_consum_dh/groups/dh_digitalassets/documents/digitalasset/dh_081007.pdf), The Stationery Office, UK  
54  
55  
56  
57  
58  
59  
60

- 1  
2  
3  
4  
5 13. Department of Health (2011) Improving outcomes a strategy for cancer  
6  
7 via  
8  
9 [http://www.dh.gov.uk/prod\\_consum\\_dh/groups/dh\\_digitalassets/documen](http://www.dh.gov.uk/prod_consum_dh/groups/dh_digitalassets/documents/digitalasset/dh_123394.pdf)  
10  
11 [ts/digitalasset/dh\\_123394.pdf](http://www.dh.gov.uk/prod_consum_dh/groups/dh_digitalassets/documents/digitalasset/dh_123394.pdf), Department of Health, London  
12  
13  
14  
15  
16 14. Department of Health and Human Services (USA) (2011), HHS Action  
17  
18 plan to reduce racial and ethnic health disparities available via  
19  
20 [http://minorityhealth.hhs.gov/npa/files/Plans/HHS/HHS\\_Plan\\_complete.p](http://minorityhealth.hhs.gov/npa/files/Plans/HHS/HHS_Plan_complete.pdf)  
21  
22 [df](http://minorityhealth.hhs.gov/npa/files/Plans/HHS/HHS_Plan_complete.pdf), Department of Health and Human Services, Washington DC  
23  
24  
25  
26  
27 15. Roy R, Symonds RP, Kumar DM, et al. The use of denial in an ethnically  
28  
29 diverse British cancer population: a cross-sectional study. *Br J Cancer*  
30  
31 2005;**92**:1393-1397. doi:10.1038/sj.bjc.6602523  
32  
33  
34  
35  
36 16. Lockett T, Butow PN, King MT, et al. A review and recommendations for  
37  
38 optimal outcome measures of anxiety, depression and general distress in  
39  
40 studies evaluating psychosocial interventions for English-speaking adults  
41  
42 with heterogeneous cancer diagnoses. *Support Care Cancer*  
43  
44 2010;**18**:1241-1262. DOI 10.1007/s00520-010-0932-8  
45  
46  
47  
48  
49 17. Carlson LE, Groff SL, Maciejewski O, et al. Screening for distress in lung  
50  
51 and breast cancer outpatients: a randomized controlled trial. *J Clin Oncol*  
52  
53 2010;**28**:4884-4891. DOI 0.1200/JCO.2009.27.3698  
54  
55  
56  
57  
58  
59  
60

- 1  
2  
3 18. Zigmond AS, Snaith RP. The hospital anxiety and depression scale. *Acta*  
4  
5 *Psychiatr Scand* 1983;**67**:361-370.  
6  
7  
8  
9  
10 19. Mitchell AJ, Baker-Glenn EA, Park B, et al. Can the Distress  
11  
12 Thermometer be improved by additional mood domains? Part II. What is  
13  
14 the optimal combination of Emotion Thermometers? *Psycho-oncology*  
15  
16 2010;**19**:134-140. DOI 10.1002/pon.1557  
17  
18  
19  
20 20. Roth AJ, Kornblith AB, Batel-Copel L, et al. Rapid screening for  
21  
22 psychologic distress in men with prostate carcinoma: a pilot study.  
23  
24 *Cancer* 1998;**82**:1904-1908.  
25  
26  
27  
28  
29 21. Brislin RW. Back-translation for cross-cultural research. *Journal of Cross-*  
30  
31 *cultural Psychology* 1970;**1**:185-216. doi: 10.1177/135910457000100301  
32  
33  
34  
35  
36 22. Kochhar PH, Rajadhyaksha SS, Suvarna VR. Translation and validation  
37  
38 of brief patient health questionnaire against DSM IV as a tool to diagnose  
39  
40 major depressive disorder in Indian patients. *J Postgrad Med*  
41  
42 2007;**53**:102-107.  
43  
44  
45  
46  
47 23. Watson M, Law M, Dossantos M, et al. The Mini-Mac; Further  
48  
49 development of the mental adjustment to cancer scale. *J Psychosoc*  
50  
51 *Oncol* 1994;**12**:33-46.  
52  
53  
54  
55  
56  
57  
58  
59  
60

- 1  
2  
3 24. Broadbent E, Petrie KJ, Main J, et al. The brief illness perception  
4  
5 questionnaire. *J Psychosom Res* 2006;**60**:631-637. DOI  
6  
7 10.1016/j.jpsychores.2005.10.020  
8  
9  
10  
11  
12 25. Lord K, Ibrahim K, Kumar S, et al. Measuring trust in healthcare  
13  
14 professionals-a study of ethnically diverse UK cancer patients. *Clin Oncol*  
15  
16 2012;**24**:13-21. DOI: 10.1016/j.clon.2011.05.010  
17  
18  
19  
20  
21 26. National Institute for Health and Clinical Excellence (NICE) 2011,  
22  
23 February 2010-last update, Clinical knowledge summaries (CKS) clinical  
24  
25 topics. Depression; Available via  
26  
27 [http://www.cks.nhs.uk/depression/management/scenario\\_bereavement/vi](http://www.cks.nhs.uk/depression/management/scenario_bereavement/vi)  
28  
29 [ew\\_full\\_scenario#-402794](http://www.cks.nhs.uk/depression/management/scenario_bereavement/vi) [2012, 26/6].  
30  
31  
32  
33  
34 27. King M, Nazareth I, Levy G, et al. Prevalence of common mental  
35  
36 disorders in general practice attendees across Europe. *Br J Psychiatry*  
37  
38 2008;**192**:362-367. DOI 10.1192/bjp.bp.107.039966  
39  
40  
41  
42  
43 28. Ashing-Giwa KT, Tejero JS, Kim J, et al. Examining predictive models of  
44  
45 HRQOL in a population-based, multiethnic sample of women with breast  
46  
47 carcinoma. *Qual Life Res* 2007;**16**:413-428. DOI 10.1007/s11136-006-  
48  
49 9138-4  
50  
51  
52  
53  
54 29. Ell K, Sanchez K, Vourlekis B, et al. Depression, correlates of depression  
55  
56 and receipt of depression care among low-income women with breast or  
57  
58  
59  
60

1  
2  
3 gynecologic cancer. *J Clin Oncol* 2005;**23**:3052-3060. DOI  
4  
5 10.1200/JCO.2005.08.041  
6  
7

8  
9  
10 30. Lord K, Mitchell AJ, Ibrahim K, et al. The beliefs and knowledge of  
11 patients newly diagnosed with cancer in a UK ethnically diverse  
12 population. *Clin Oncol* 2012;**24**:4-12. DOI 10.1016/j.clon.2011.05.008  
13  
14  
15

16  
17  
18 31. Osborne RH, Elsworth GR, Hopper JL. Age-specific norms and  
19 determinants of anxiety and depression in 731 women with breast cancer  
20 recruited through a population-based cancer registry. *Eur J Cancer*  
21 2003;**39**:755-762.  
22  
23  
24  
25  
26

27  
28  
29 32. Akechi T, Okuyama T, Sugawara Y, et al. Major depression, adjustment  
30 disorders, and post-traumatic stress disorder in terminally ill cancer  
31 patients: associated and predictive factors. *J Clin Oncol* 2004;**22**:1957-  
32 1965. DOI 10.1200/JCO.2004.08.149  
33  
34  
35  
36  
37  
38

39  
40 33. Schou I, Ekeberg O, Ruland CM, et al. Pessimism as a predictor of  
41 emotional morbidity one year following breast cancer surgery.  
42  
43  
44  
45  
46  
47  
48  
49  
50  
51  
52  
53  
54  
55  
56  
57  
58  
59  
60

59  
60 34. Brothers BM, Andersen BL. Hopelessness as a predictor of depressive  
symptoms for breast cancer patients coping with recurrence. *Psycho-*  
*oncology* 2009;**18**:267-275. DOI 10.1002/pon.1394

- 1  
2  
3 35. Lo C, Zimmermann C, Rydall A, et al. Longitudinal Study of Depressive  
4  
5 Symptoms in Patients with Metastatic Gastrointestinal and Lung Cancer.  
6  
7 *J Clin Oncol* 2010;**28**:3084. DOI 10.1200/JCO.2009.26.9712  
8  
9  
10  
11  
12 36. Grassi L, Travado L, Gil F, et al. Hopelessness and related variables  
13  
14 among cancer patients in the Southern European Psycho-Oncology  
15  
16 Study (SEPOS). *Psychosomatics* 2010;**51**:201-207. DOI  
17  
18 10.1176/appi.psy.51.3.201  
19  
20  
21  
22  
23 37. Johansson M, Ryden A, Finizia C. Mental adjustment to cancer and its  
24  
25 relation to anxiety, depression, HRQL and survival in patients with  
26  
27 laryngeal cancer - A longitudinal study. *BMC Cancer* 2011;**11**:283. DOI  
28  
29 10.1186/1471-2407-11-283  
30  
31  
32  
33  
34 38. Chaturvedi SK, Chandra PS, Channabasavanna SM, et al. Levels of  
35  
36 anxiety and depression in patients receiving radiotherapy in India.  
37  
38 *Psychooncology* 1996;**5**:343-346. DOI: 10.1002/(SICI)1099-  
39  
40 1611(199612)  
41  
42  
43  
44  
45 39. Kishore J, Ahmad I, Kaur R, PKM. Beliefs and perceptions about cancers  
46  
47 among patients attending radiotherapy OPD in Delhi, India. *Asian Pac J*  
48  
49 *Cancer Prev* 2008;**9**:155-158.  
50  
51  
52  
53  
54 40. Szczepura A, Price C, Gumber A. Breast and bowel cancer screening  
55  
56 uptake patterns over 15 years for UK South Asian ethnic minority  
57  
58  
59  
60

1  
2  
3 populations corrected for differences in socio-demographic  
4  
5 characteristics. *BMC Public Health* 2008;**8**:346.  
6  
7

8  
9  
10 41. Miles A, Rainbow S, von Wagner C. Cancer Fatalism and Poor Self-  
11  
12 Rated Health Mediate the Association between Socioeconomic Status  
13  
14 and Uptake of Colorectal Cancer Screening in England. *Cancer*  
15  
16 *Epidemiol Biomarkers Prev* 2011;**20**:2132-2140. DOI 10.1158/1055-  
17  
18 9965.EPI-11-0453  
19

20  
21  
22  
23 42. Muthu Kumar D, Symonds RP, Sundar S, et al. Information needs of  
24  
25 Asian and White British cancer patients and their families in  
26  
27 Leicestershire: a cross-sectional survey. *Br J Cancer* 2004;**90**:1474-  
28  
29 1478. doi:10.1038/sj.bjc.6601774  
30  
31  
32  
33  
34  
35  
36  
37  
38  
39  
40  
41  
42  
43  
44  
45  
46  
47  
48  
49  
50  
51  
52  
53  
54  
55  
56  
57  
58  
59  
60

## Longitudinal comparison of anxiety and depression in BSA and BW patients

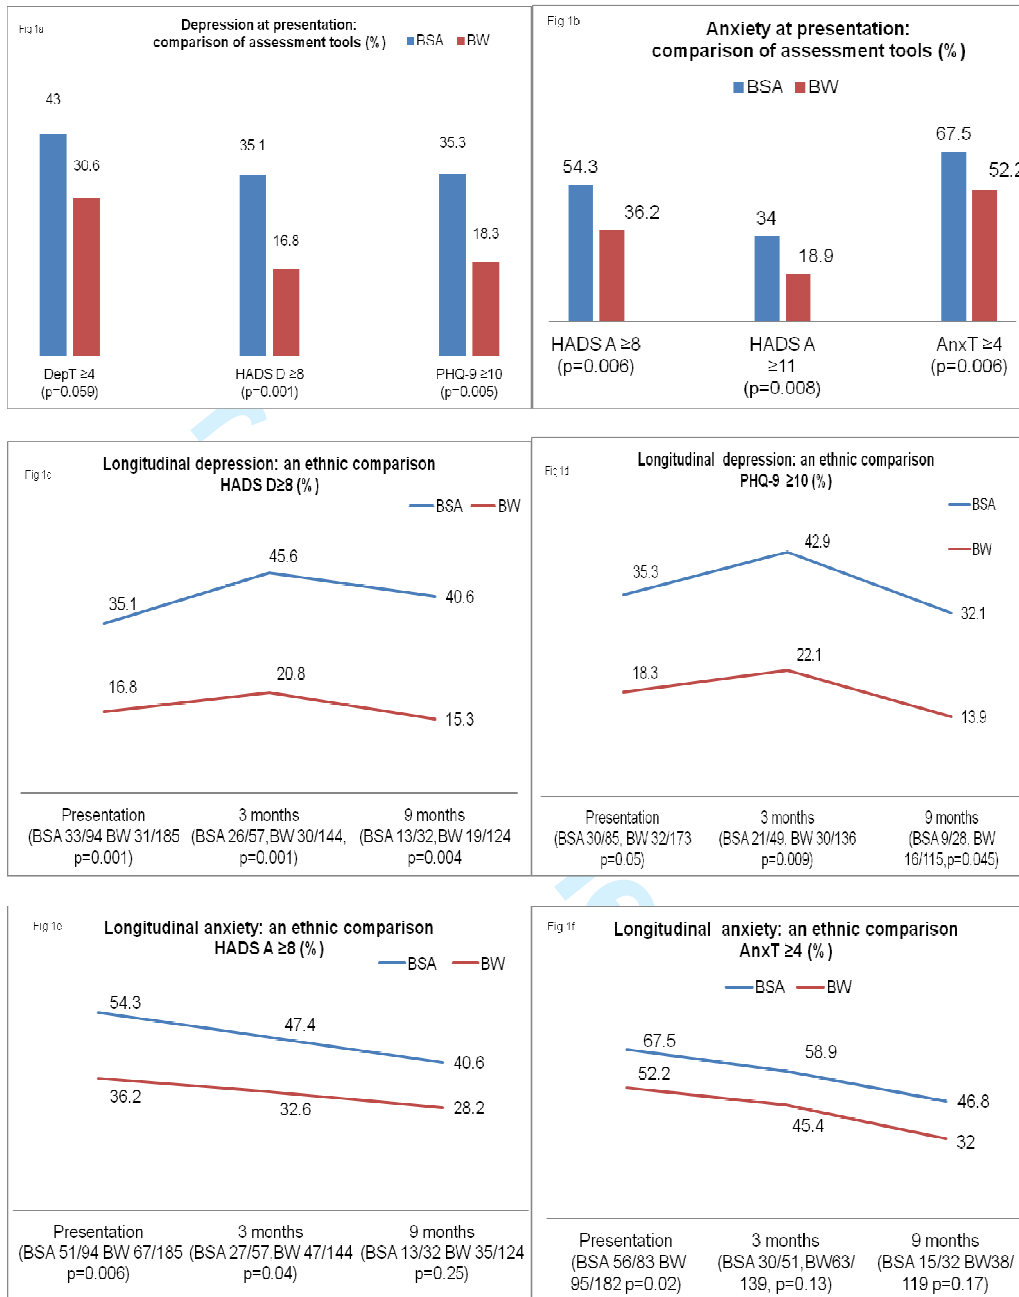



**Longitudinal comparison of coping strategies in BSA and BW patients: median scores with 95% CI. (where absent CI=0)**

1  
2  
3  
4  
5  
6  
7  
8  
9  
10  
11  
12  
13  
14  
15  
16  
17  
18  
19  
20  
21  
22  
23  
24  
25  
26  
27  
28  
29  
30  
31  
32  
33  
34  
35  
36  
37  
38  
39  
40  
41  
42  
43  
44  
45  
46  
47  
48  
49  
50  
51  
52  
53  
54  
55  
56  
57  
58  
59  
60

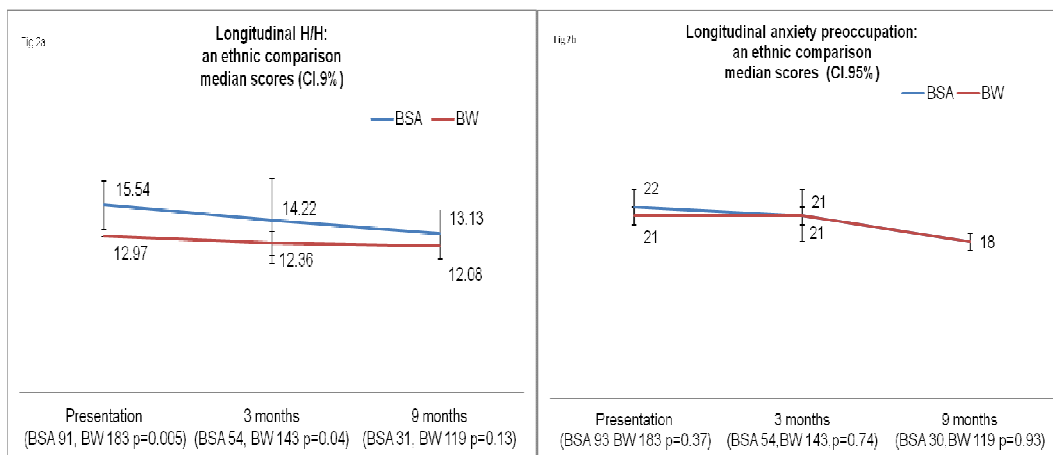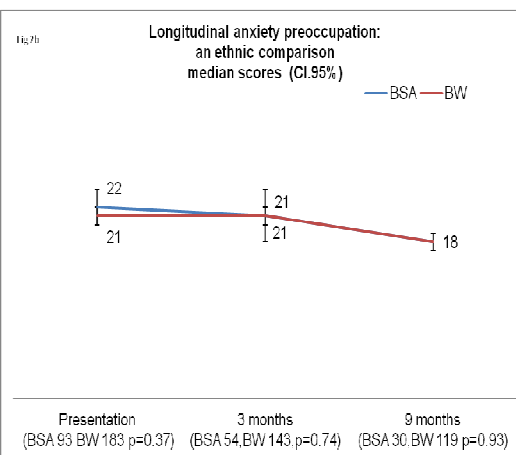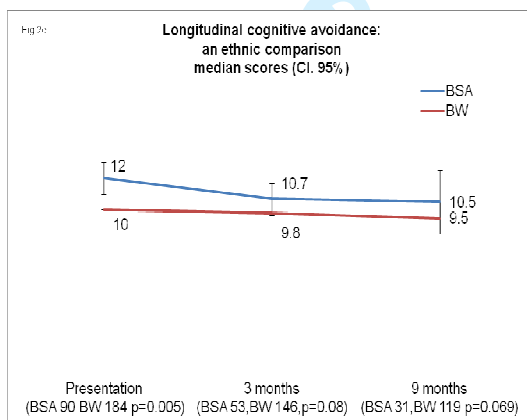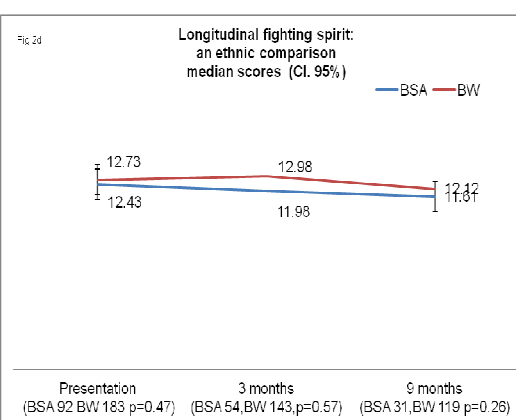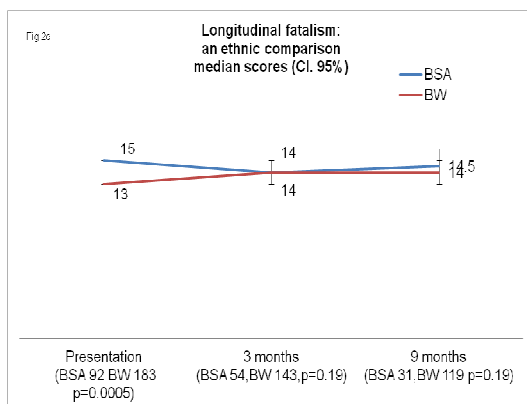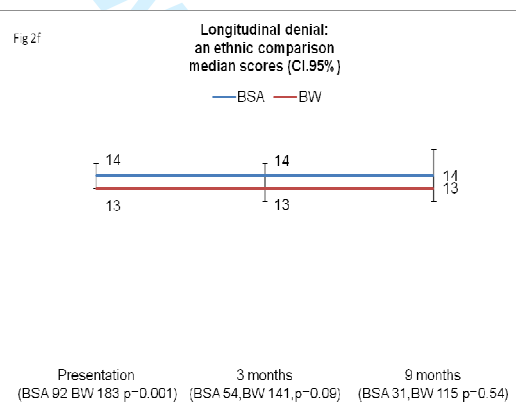

1  
2  
3  
4  
5  
6  
7  
8  
9  
10  
11  
12  
13  
14  
15  
16  
17  
18  
19  
20  
21  
22  
23  
24  
25  
26  
27  
28  
29  
30  
31  
32  
33  
34  
35  
36  
37  
38  
39  
40  
41  
42  
43  
44  
45  
46  
47  
48  
49  
50  
51  
52  
53  
54  
55  
56  
57  
58  
59  
60

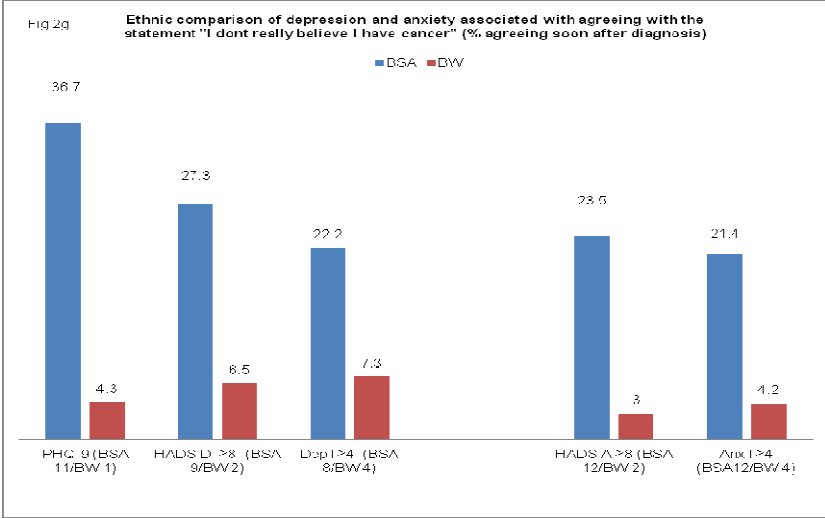

peer review only

Longitudinal associations  
between coping strategies and  
depression via PHQ9

| Mann Whitney<br>U Test (PHQ-9 9v10) |      |    | n=  | Mean Rank<br>Score (MRS) | Median (IQR) | U      | Z      | r     | p-value |
|-------------------------------------|------|----|-----|--------------------------|--------------|--------|--------|-------|---------|
|                                     | Pres | ND | 193 | 112.38                   | 12(10:15.5)  |        |        |       |         |
|                                     |      | D  | 62  | 176.61                   | 17(13:21)    | 2969   | -5.987 | 0.37  | 0.0005  |
|                                     | 3m   | ND | 134 | 76.02                    | 11(8:14)     |        |        |       |         |
|                                     |      | D  | 49  | 135.69                   | 17(16:19)    | 1142   | -6.808 | 0.5   | 0.0005  |
|                                     | 9m   | ND | 116 | 63.98                    | 11(9:15.5)   |        |        |       |         |
|                                     |      | D  | 23  | 100.37                   | 16.5(11:19)  | 635.5  | -3.998 | 0.34  | 0.0005  |
| Cog. Avoidance                      | Pres | ND | 192 | 120.03                   | 10(9:12)     |        |        |       |         |
|                                     |      | D  | 61  | 148.93                   | 11(10:13)    | 4518.5 | -2.712 | 0.16  | 0.007   |
|                                     | 3m   | ND | 134 | 90.10                    | 10(8:12)     |        |        |       |         |
|                                     |      | D  | 49  | 97.20                    | 11(10:12)    | 3028   | -.810  | 0.06  | 0.418   |
|                                     | 9m   | ND | 116 | 67.15                    | 10(8:12)     |        |        |       |         |
|                                     |      | D  | 23  | 84.37                    | 11(10:13)    | 1003.5 | -1.886 | 0.16  | 0.059   |
| Fatalism                            | Pres | ND | 205 | 123.64                   | 14(12:16)    |        |        |       |         |
|                                     |      | D  | 53  | 152.18                   | 15(13:17)    | 4740.5 | -2.474 | 0.15  | 0.013   |
|                                     | 3m   | ND | 134 | 88.95                    | 14(12:16)    |        |        |       |         |
|                                     |      | D  | 49  | 100.35                   | 14(13:16)    | 2874   | -1.297 | 0.09  | 0.15    |
|                                     | 9m   | ND | 116 | 67.81                    | 14(12:15)    |        |        |       |         |
|                                     |      | D  | 23  | 81.07                    | 15(13:19)    | 1079.5 | -1.451 | 0.12  | 0.147   |
| Anx. Preoccup.                      | Pres | ND | 194 | 113.58                   | 20(17:23)    |        |        |       |         |
|                                     |      | D  | 62  | 175.19                   | 24.5 (21:27) | 3119   | -5.987 | 0.37  | 0.0005  |
|                                     | 3m   | ND | 134 | 78.86                    | 19(16:23)    |        |        |       |         |
|                                     |      | D  | 49  | 127.94                   | 24(21:27)    | 1522   | -5.559 | 0.4   | 0.0005  |
|                                     | 9m   | ND | 116 | 62.86                    | 18(15:20.5)  |        |        |       |         |
|                                     |      | D  | 23  | 106                      | 24(22:26)    | 506    | -4.704 | 0.4   | 0.0005  |
| Fight. Spirit                       | Pres | ND | 194 | 130.87                   | 13(12:14)    |        |        |       |         |
|                                     |      | D  | 62  | 121.08                   | 13(11:14)    | 5554   | -.916  | -0.05 | 0.359   |
|                                     | 3m   | ND | 134 | 94.60                    | 12(11:14)    |        |        |       |         |
|                                     |      | D  | 49  | 84.90                    | 12(11:13)    | 2935   | -1.109 | 0.08  | 0.268   |
|                                     | 9m   | ND | 116 | 70.43                    | 12(10:14)    |        |        |       |         |
|                                     |      | D  | 23  | 67.85                    | 13(11:13)    | 1284.5 | -.283  | 0.02  | 0.777   |
| Denial                              | Pres | ND | 194 | 124.49                   | 14 (12:15)   |        |        |       |         |
|                                     |      | D  | 62  | 141.05                   | 14.5 (12:17) | 5236   | -1.542 | -0.09 | 0.123   |
|                                     | 3m   | ND | 130 | 87.52                    | 13(12:15)    |        |        |       |         |
|                                     |      | D  | 49  | 96.58                    | 14(12:15)    | 2862.5 | -1.051 | 0.07  | 0.293   |
|                                     | 9m   | ND | 114 | 68.82                    | 12(11.50:15) |        |        |       |         |
|                                     |      | D  | 23  | 69.89                    | 13(11:16)    | 1290.5 | -.119  | 0.01  | 0.905   |

Longitudinal associations between coping strategies and depression via DepT

| Mann Whitney    |      |      | n=  | Mean Rank Score (MRS) | Md(IQR)     | U        | Z      | r      | p-value |
|-----------------|------|------|-----|-----------------------|-------------|----------|--------|--------|---------|
| <b>DepT 3v4</b> | H/H  | Pres | ND  | 170                   | 108.52      | 12(9:15) |        |        |         |
|                 |      | D    | 92  | 173.96                | 16.5(13:19) | 3913.5   | -6.698 | 0.41   | 0.0005  |
|                 | 3m   | ND   | 118 | 81.49                 | 12(9:16)    |          |        |        |         |
|                 |      | D    | 68  | 114.34                | 15(12:19)   | 2595     | -4.022 | 0.29   | 0.0005  |
|                 | 9m   | ND   | 113 | 66.51                 | 11.5(9:15)  |          |        |        |         |
|                 |      | D    | 34  | 98.88                 | 15(12:17)   | 1075     | -3.905 | 0.32   | 0.0005  |
| Cog. Avoid.     | Pres | ND   | 169 | 120.10                | 10(8:12)    |          |        |        |         |
|                 |      | D    | 91  | 149.81                | 11(10:12)   | 5932.5   | -3.067 | 0.19   | 0.002   |
|                 | 3m   | ND   | 117 | 90.51                 | 10(9:15)    |          |        |        |         |
|                 |      | D    | 68  | 97.29                 | 11(9:12)    | 3686.5   | -.838  | 0.06   | 0.402   |
|                 | 9m   | ND   | 113 | 73.92                 | 10(8:12)    |          |        |        |         |
|                 |      | D    | 34  | 74.26                 | 10(8:12)    | 1912     | -.042  | 0.0003 | 0.967   |
| Fatalism        | Pres | ND   | 170 | 125.88                | 14(12:16)   |          |        |        |         |
|                 |      | D    | 92  | 141.88                | 14(13:16)   | 6865     | -1.641 | 0.1    | 0.101   |
|                 | 3m   | ND   | 118 | 88.49                 | 13(12:15)   |          |        |        |         |
|                 |      | D    | 68  | 102.19                | 14(12.5:16) | 3421     | -1.684 | 0.12   | 0.092   |
|                 | 9m   | ND   | 113 | 72.94                 | 13(12:16)   |          |        |        |         |
|                 |      | D    | 34  | 77.53                 | 14(13:16)   | 1801     | -.555  | 0.04   | 0.579   |
| Anx. Preocc.    | Pres | ND   | 171 | 103.12                | 20(17:22)   |          |        |        |         |
|                 |      | D    | 92  | 185.68                | 24(22:27)   | 2927.5   | -8.412 | 0.52   | 0.0005  |
|                 | 3m   | ND   | 119 | 75.85                 | 19(17:22)   |          |        |        |         |
|                 |      | D    | 68  | 125.76                | 24(21:27)   | 1886     | -6.079 | 0.44   | 0.0005  |
|                 | 9m   | ND   | 114 | 66.54                 | 20(17:23)   |          |        |        |         |
|                 |      | D    | 34  | 101.19                | 24(21:27)   | 1030.5   | -4.145 | 0.34   | 0.0005  |
| Fighting Spirit | Pres | ND   | 171 | 132.79                | 13(11:14)   |          |        |        |         |

|               |      |    |     |        |             |        |        |       |       |
|---------------|------|----|-----|--------|-------------|--------|--------|-------|-------|
|               |      | D  | 92  | 130.53 | 13(11.5:14) | 7731   | -0.232 | 0.01  | 0.817 |
|               | 3m   | ND | 119 | 93.64  | 13(11:14.5) |        |        |       |       |
|               |      | D  | 68  | 94.63  | 13(11:14)   | 4003   | -.122  | 0.008 | 0.903 |
|               | 9m   | ND | 114 | 77.39  | 13(11:15)   |        |        |       |       |
|               |      | D  | 34  | 64.81  | 12(11:14)   | 1608.5 | -1.518 | 0.12  | 0.129 |
| Denial (CIDQ) | Pres | ND | 172 | 132.44 | 14(12:15)   |        |        |       |       |
|               |      | D  | 92  | 132.61 | 13.5(12:16) | 7901.5 | -0.018 | 0.001 | 0.986 |
|               | 3m   | ND | 119 | 90.95  | 13(12:15)   |        |        |       |       |
|               |      | D  | 68  | 99.34  | 13(12:16)   | 3683   | -1.026 | 0.06  | 0.305 |
|               | 9m   | ND | 115 | 76.65  | 13(12:15)   |        |        |       |       |
|               |      | D  | 34  | 69.41  | 13(11:15)   | 1765   | -.865  | 0.07  | 0.387 |

1  
2  
3  
4  
5  
6  
7  
8  
9  
10  
11  
12  
13  
14  
15  
16  
17  
18  
19  
20  
21  
22  
23  
24  
25  
26  
27  
28  
29  
30  
31  
32  
33  
34  
35  
36  
37  
38  
39  
40  
41  
42  
43  
44  
45  
46  
47  
48  
49

**Longitudinal associations between coping strategies and anxiety via HADS A**

| Mann<br>Whitney<br>U Test HADS A 7v8 |      |    | n=  | Mean<br>Rank<br>Score | Median<br>(IQR) | U      | Z       | r    | p-value |
|--------------------------------------|------|----|-----|-----------------------|-----------------|--------|---------|------|---------|
| H/H                                  | Pres | NA | 158 | 107.85                | 12(9:15)        |        |         |      |         |
|                                      |      | A  | 116 | 177.89                | 16(13:19)       | 4479   | -7.255  | 0.43 | 0.0005  |
|                                      | 3m   | NA | 127 | 82.14                 | 11(8:14)        |        |         |      |         |
|                                      |      | A  | 70  | 129.59                | 16(12:18.5)     | 2303.5 | -5.636  | 0.4  | 0.0005  |
|                                      | 9m   | NA | 103 | 63.25                 | 11(8:14)        |        |         |      |         |
|                                      |      | A  | 45  | 100.26                | 15(13:16)       | 1158.5 | -4.875  | 0.4  | 0.0005  |
| Cog. Avoidance                       | Pres | NA | 157 | 121.87                | 10(8:12)        |        |         |      |         |
|                                      |      | A  | 115 | 156.47                | 11(10:14)       | 6731   | -3.618  | 0.22 | 0.0005  |
|                                      | 3m   | NA | 126 | 91.30                 | 10(8:11)        |        |         |      |         |
|                                      |      | A  | 70  | 111.46                | 11(9.5:12)      | 3503   | -2.402  | 0.17 | 0.016   |
|                                      | 9m   | NA | 103 | 69.35                 | 10(8:12)        |        |         |      |         |
|                                      |      | A  | 45  | 86.28                 | 11(9:12)        | 1787.5 | -2.226  | 0.18 | 0.026   |
| Fatalism                             | Pres | NA | 158 | 127.62                | 14(12:15.5)     |        |         |      |         |
|                                      |      | A  | 117 | 152.02                | 15(12:15)       | 7603   | -2.530  | 0.15 | 0.011   |
|                                      | 3m   | NA | 127 | 93.93                 | 14(13:16)       |        |         |      |         |
|                                      |      | A  | 70  | 108.21                | 14(12:16)       | 3800   | -1.693  | 0.12 | 0.090   |
|                                      | 9m   | NA | 103 | 74.87                 | 14(12:16)       |        |         |      |         |
|                                      |      | A  | 44  | 71.97                 | 13(12:15)       | 2176.5 | -.381   | 0.03 | 0.703   |
| Anx .Preoccup.                       | Pres | NA | 159 | 96.14                 | 19(16:21)       |        |         |      |         |
|                                      |      | A  | 117 | 196.06                | 24(22:27)       | 2566.5 | -10.374 | 0.63 | 0.0005  |
|                                      | 3m   | NA | 127 | 74.33                 | 18(16:21)       |        |         |      |         |
|                                      |      | A  | 70  | 143.76                | 24(22:27)       | 1312   | -8.195  | 0.58 | 0.0005  |
|                                      | 9m   | NA | 103 | 58.83                 | 17(15:20)       |        |         |      |         |
|                                      |      | A  | 44  | 109.52                | 23(21:25)       | 703    | -6.627  | 0.54 | 0.0005  |
| Fighting Spirit                      | Pres | NA | 159 | 138.95                | 13(11:14)       |        |         |      |         |
|                                      |      | A  | 116 | 136.70                | 13(11:14)       | 9071.5 | -0.234  | 0.01 | 0.815   |

|               |      |    |     |        |               |        |        |      |       |
|---------------|------|----|-----|--------|---------------|--------|--------|------|-------|
|               | 3m   | NA | 127 | 101.14 | 12(11:14)     |        |        |      |       |
|               |      | A  | 70  | 95.11  | 12 (11:14)    | 4173   | -.718  | 0.05 | 0.473 |
|               | 9m   | NA | 103 | 75.50  | 12(10:14)     |        |        |      |       |
|               |      | A  | 45  | 72.21  | 12(11:13)     | 2214.5 | -.433  | 0.03 | 0.665 |
| Denial (CIDQ) | Pres | NA | 160 | 135.80 | 13(12:15)     |        |        |      |       |
|               |      | A  | 115 | 141.06 | 14(12:16)     | 884.5  | -0.544 | 0.03 | 0.587 |
|               | 3m   | NA | 125 | 93.54  | 13(12:15)     |        |        |      |       |
|               |      | A  | 70  | 105.96 | 13.5(12:15.5) | 3818   | -1.484 | 0.1  | 0.138 |
|               | 9m   | NA | 98  | 72.10  | 13(11:15)     |        |        |      |       |
|               |      | A  | 45  | 73.36  | 13(12:15)     | 2214.5 | -.170  | 0.01 | 0.865 |

1  
2  
3  
4  
5  
6  
7  
8  
9  
10  
11  
12  
13  
14  
15  
16  
17  
18  
19  
20  
21  
22  
23  
24  
25  
26  
27  
28  
29  
30  
31  
32  
33  
34  
35  
36  
37  
38  
39  
40  
41  
42  
43  
44  
45  
46  
47  
48  
49

**Longitudinal associations between coping strategies and depression (HADS D)**

| <b>Mann<br/>Whitney<br/>U Test HADS D 7v8</b> |      |    | <b>n=</b> | <b>Mean<br/>Rank<br/>Score</b> | <b>Median (IQR)</b> | <b>U</b> | <b>Z</b> | <b>r</b> | <b>p-value</b> |
|-----------------------------------------------|------|----|-----------|--------------------------------|---------------------|----------|----------|----------|----------------|
| H/H                                           | Pres | ND | 211       | 119.09                         | 12(10:15)           |          |          |          |                |
|                                               |      | D  | 63        | 199.17                         | 17.5(14:21.5)       | 2761.5   | -7.065   | 0.42     | 0.0005         |
|                                               | 3m   | ND | 145       | 83.79                          | 11(9:15.5)          |          |          |          |                |
|                                               |      | D  | 52        | 141.41                         | 16.5(11:19)         | 1564.5   | -6.303   | 0.4      | 0.0005         |
|                                               | 9m   | ND | 117       | 65.87                          | 11(9:15)            |          |          |          |                |
|                                               |      | D  | 31        | 107.08                         | 16(14:18)           | 803.5    | -4.802   | 0.39     | 0.0005         |
| Cog. Avoid                                    | Pres | ND | 210       | 128.22                         | 10(9:12)            |          |          |          |                |
|                                               |      | D  | 62        | 164.56                         | 11(10:13)           | 4770.5   | -3.227   | 0.19     | 0.001          |
|                                               | 3m   | ND | 144       | 95.41                          | 10(8:12)            |          |          |          |                |
|                                               |      | D  | 52        | 107.05                         | 11(10:13)           | 3299.5   | -1.278   | 0.09     | 0.201          |
|                                               | 9m   | ND | 117       | 71.86                          | 10(8:12)            |          |          |          |                |
|                                               |      | D  | 31        | 84.45                          | 11(9:12)            | 1505     | -1.464   | 0.12     | 0.143          |
| Fatalism                                      | Pres | ND | 211       | 132.59                         | 14(12:16)           |          |          |          |                |
|                                               |      | D  | 64        | 155.85                         | 15.5(13:17)         | 5609.5   | -2.062   | 0.12     | 0.039          |
|                                               | 3m   | ND | 145       | 96.07                          | 14(12:15)           |          |          |          |                |
|                                               |      | D  | 52        | 107.16                         | 14(13:17)           | 3345.5   | -1.211   | 0.08     | 0.226          |
|                                               | 9m   | ND | 117       | 73.19                          | 14(12:15)           |          |          |          |                |
|                                               |      | D  | 30        | 77.17                          | 14(13:16)           | 1660     | -.459    | 0.03     | 0.646          |
| Anx. Peocc                                    | Pres | ND | 212       | 121.09                         | 20(17:23)           |          |          |          |                |
|                                               |      | D  | 64        | 196.18                         | 25(22.5:27.5)       | 3092.5   | -6.610   | 0.39     | 0.0005         |
|                                               | 3m   | ND | 145       | 83.76                          | 18(15:20.5)         |          |          |          |                |
|                                               |      | D  | 52        | 141.41                         | 24(22:26)           | 1559.5   | -6.278   | 0.44     | 0.0005         |
|                                               | 9m   | ND | 117       | 76.65                          | 18(15:21)           |          |          |          |                |
|                                               |      | D  | 30        | 103.08                         | 23(18:26)           | 882.5    | -4.203   | 0.34     | 0.0005         |
| Fighting Spirit                               | Pres | ND | 212       | 138.95                         | 13(12:14)           |          |          |          |                |



|        |      |    |     |        |              |        |        |      |       |
|--------|------|----|-----|--------|--------------|--------|--------|------|-------|
|        |      | D  | 63  | 134.80 | 13(11:14)    | 6476.5 | -.368  | 0.02 | 0.713 |
|        | 3m   | ND | 145 | 104.56 | 13(10:14)    |        |        |      |       |
|        |      | D  | 52  | 83.51  | 12(11:13)    | 2964.5 | -2.309 | 0.16 | 0.021 |
|        | 9m   | ND | 117 | 76.65  | 12(11:14)    |        |        |      |       |
|        |      | D  | 31  | 66.40  | 12(10:13)    | 1562.5 | -1.192 | 0.09 | 0.233 |
| Denial | Pres | ND | 211 | 138.33 | 13 (12:15)   |        |        |      |       |
|        |      | D  | 64  | 136.90 | 14 (12:16)   | 6681.5 | -.127  | 0.07 | 0.899 |
|        | 3m   | ND | 141 | 94.36  | 13(11.50:15) |        |        |      |       |
|        |      | D  | 54  | 107.5  | 14(11:16)    | 3294   | -1.466 | 0.10 | 0.143 |
|        | 9m   | ND | 114 | 75.29  | 13(12:16)    |        |        |      |       |
|        |      | D  | 30  | 61.92  | 13(10:14)    | 1392.5 | -1.573 | 0.13 | 0.116 |

1  
2  
3  
4  
5  
6  
7  
8  
9  
10  
11  
12  
13  
14  
15  
16  
17  
18  
19  
20  
21  
22  
23  
24  
25  
26  
27  
28  
29  
30  
31  
32  
33  
34  
35  
36  
37  
38  
39  
40  
41  
42  
43  
44  
45  
46  
47  
48  
49

Longitudinal associations between coping strategies and depression via PHQ-9

| Mann Whitney U Test (PHQ-9 9v10) |      |    | n=  | Mean Rank Score (MRS) | Median (IQR) | U      | Z      | r    | p-value |
|----------------------------------|------|----|-----|-----------------------|--------------|--------|--------|------|---------|
|                                  | Pres | ND | 193 | 112.38                | 12(10:15.5)  |        |        |      |         |
|                                  |      | D  | 62  | 176.61                | 17(13:21)    | 2969   | -5.987 | 0.37 | 0.0005  |
|                                  | 3m   | ND | 134 | 76.02                 | 11(8:14)     |        |        |      |         |
|                                  |      | D  | 49  | 135.69                | 17(16:19)    | 1142   | -6.808 | 0.5  | 0.0005  |
|                                  | 9m   | ND | 116 | 63.98                 | 11(9:15.5)   |        |        |      |         |
|                                  |      | D  | 23  | 100.37                | 16.5(11:19)  | 635.5  | -3.998 | 0.34 | 0.0005  |
| Cog. Avoidance                   | Pres | ND | 192 | 120.03                | 10(9:12)     |        |        |      |         |
|                                  |      | D  | 61  | 148.93                | 11(10:13)    | 4518.5 | -2.712 | 0.16 | 0.007   |
|                                  | 3m   | ND | 134 | 90.10                 | 10(8:12)     |        |        |      |         |
|                                  |      | D  | 49  | 97.20                 | 11(10:12)    | 3028   | -.810  | 0.06 | 0.418   |
|                                  | 9m   | ND | 116 | 67.15                 | 10(8:12)     |        |        |      |         |
|                                  |      | D  | 23  | 84.37                 | 11(10:13)    | 1003.5 | -1.886 | 0.16 | 0.059   |
| Fatalism                         | Pres | ND | 205 | 123.64                | 14(12:16)    |        |        |      |         |
|                                  |      | D  | 53  | 152.18                | 15(13:17)    | 4740.5 | -2.474 | 0.15 | 0.013   |
|                                  | 3m   | ND | 134 | 88.95                 | 14(12:16)    |        |        |      |         |
|                                  |      | D  | 49  | 100.35                | 14(13:16)    | 2874   | -1.297 | 0.09 | 0.15    |
|                                  | 9m   | ND | 116 | 67.81                 | 14(12:15)    |        |        |      |         |
|                                  |      | D  | 23  | 81.07                 | 15(13:19)    | 1079.5 | -1.451 | 0.12 | 0.147   |
| Anx. Preoccup.                   | Pres | ND | 194 | 113.58                | 20(17:23)    |        |        |      |         |
|                                  |      | D  | 62  | 175.19                | 24.5 (21:27) | 3119   | -5.987 | 0.37 | 0.0005  |
|                                  | 3m   | ND | 134 | 78.86                 | 19(16:23)    |        |        |      |         |
|                                  |      | D  | 49  | 127.94                | 24(21:27)    | 1522   | -5.559 | 0.4  | 0.0005  |
|                                  | 9m   | ND | 116 | 62.86                 | 18(15:20.5)  |        |        |      |         |
|                                  |      | D  | 23  | 106                   | 24(22:26)    | 506    | -4.704 | 0.4  | 0.0005  |
| Fight. Spirit                    | Pres | ND | 194 | 130.87                | 13(12:14)    |        |        |      |         |

|        |      |    |     |        |              |        |        |       |       |
|--------|------|----|-----|--------|--------------|--------|--------|-------|-------|
|        |      | D  | 62  | 121.08 | 13(11:14)    | 5554   | -0.916 | -0.05 | 0.359 |
|        | 3m   | ND | 134 | 94.60  | 12(11:14)    |        |        |       |       |
|        |      | D  | 49  | 84.90  | 12(11:13)    | 2935   | -1.109 | 0.08  | 0.268 |
|        | 9m   | ND | 116 | 70.43  | 12(10:14)    |        |        |       |       |
|        |      | D  | 23  | 67.85  | 13(11:13)    | 1284.5 | -0.283 | 0.02  | 0.777 |
| Denial | Pres | ND | 194 | 124.49 | 14 (12:15)   |        |        |       |       |
|        |      | D  | 62  | 141.05 | 14.5 (12:17) | 5236   | -1.542 | -0.09 | 0.123 |
|        | 3m   | ND | 130 | 87.52  | 13(12:15)    |        |        |       |       |
|        |      | D  | 49  | 96.58  | 14(12:15)    | 2862.5 | -1.051 | 0.07  | 0.293 |
|        | 9m   | ND | 114 | 68.82  | 12(11.50:15) |        |        |       |       |
|        |      |    | 23  | 69.89  | 13(11:16)    | 1290.5 | -0.119 | 0.01  | 0.905 |

### Longitudinal associations between treatment intent and depression

| HADS<br>D 7v8 |              |      | n=  | ≤7  | %    | ≥8 | %    | p value |
|---------------|--------------|------|-----|-----|------|----|------|---------|
|               | Presentation | Rad  | 188 | 151 | 80.3 | 37 | 19.7 |         |
|               |              | Pall | 91  | 64  | 70.3 | 27 | 29.7 | 0.088   |
|               | 3 months     | Rad  | 136 | 96  | 70.6 | 40 | 29.4 |         |
|               |              | Pall | 65  | 49  | 75.4 | 16 | 24.6 | 0.588   |
|               | 9 months     | Rad  | 111 | 88  | 79.3 | 23 | 20.7 |         |
|               |              | Pall | 45  | 36  | 80   | 9  | 20   | 1.0     |

### Longitudinal associations between treatment intent and anxiety

| HADS<br>A 7v8 |              |      | n=  | ≤7  | %    | ≥8 | %    | p value |
|---------------|--------------|------|-----|-----|------|----|------|---------|
|               | Presentation | Rad  | 188 | 112 | 59.6 | 76 | 40.4 |         |
|               |              | Pall | 91  | 49  | 53.8 | 42 | 46.2 | 0.436   |
|               | 3 months     | Rad  | 136 | 88  | 64.7 | 48 | 35.3 |         |
|               |              | Pall | 65  | 39  | 60   | 26 | 40   | 0.624   |
|               | 9 months     | Rad  | 111 | 71  | 64   | 40 | 36   |         |
|               |              | Pall | 45  | 37  | 82.2 | 8  | 17.8 | 0.041   |

**Supplementary Table 1: Influence of deprivation**

| Ethnicity and anx/ dep corrected for deprivation | No. | Pearson product-moment correlation | p-value | No. | Correlation corrected for deprivation | p-value |
|--------------------------------------------------|-----|------------------------------------|---------|-----|---------------------------------------|---------|
| HADS D                                           | 277 | -.274                              | 0.0005  | 276 | -.235                                 | 0.0005  |
| PHQ-9                                            | 256 | -.257                              | 0.0005  | 255 | -.208                                 | 0.001   |
| DepT                                             | 262 | -.131                              | 0.033   | 261 | -.118                                 | 0.057   |
| AnxT                                             | 263 | -.087                              | .158    | 262 | -0.083                                | .179    |
| HADS A                                           | 277 | -.147                              | 0.014   | 276 | -.093                                 | .123    |

Supplementary Table 2: Ethnic differences in anxiety and depression

| Mann Whitney U Test |          |     | n=  | Mean Rank Score | Md(IQR)   | U      | Z      | r     | Sig.   |
|---------------------|----------|-----|-----|-----------------|-----------|--------|--------|-------|--------|
| PHQ-9               | Present. | BSA | 85  | 156.95          | 7(3:12)   |        |        |       |        |
|                     |          | BW  | 173 | 116.01          | 4(2:8)    | 5019   | -4.158 | -0.29 | 0.0005 |
|                     | 3m       | BSA | 49  | 112.64          | 9(5:12)   |        |        |       |        |
|                     |          | BW  | 136 | 85.92           | 5(2:8)    | 2369   | -3.003 | 0-.22 | 0.003  |
|                     | 9 m      | BSA | 28  | 84.32           | 4 (2:10)  |        |        |       |        |
|                     |          | BW  | 115 | 69.00           | 3(1:7.5)  | 1265   | -1.767 | -0.14 | 0.077  |
| HADS D              | Present. | BSA | 94  | 166.43          | 5(2:10)   |        |        |       |        |
|                     |          | BW  | 185 | 126.57          | 3(1:6)    | 6211   | -3.919 | -0.23 | 0.0005 |
|                     | 3m       | BSA | 57  | 125.31          | 6.5(4:10) |        |        |       |        |
|                     |          | BW  | 144 | 91.38           | 4(2:7)    | 2718.5 | -3.742 | -0.26 | 0.0005 |
|                     | 9 m      | BSA | 32  | 98.47           | 6(2:9)    |        |        |       |        |
|                     |          | BW  | 124 | 73.35           | 3(1:7.5)  | 1345   | -2.825 | -0.25 | 0.005  |
| DepT                | Present. | BSA | 84  | 147.51          | 3(0:6)    |        |        |       |        |
|                     |          | BW  | 180 | 125.50          | 1(0:4)    | 6299.5 | -2.249 | -0.13 | 0.024  |
|                     | 3m       | BSA | 51  | 119.72          | 4.5(1:6)  |        |        |       |        |
|                     |          | BW  | 138 | 85.87           | 1(0:3)    | 2258.5 | -3.877 | -0.30 | 0.0005 |
|                     | 9 m      | BSA | 30  | 90.35           | 1(0:5)    |        |        |       |        |
|                     |          | BW  | 120 | 71.85           | 0(0:2)    | 1354.5 | -2.237 | -0.18 | 0.025  |
| AnxT                | Present. | BSA | 83  | 141.80          | 5(2:8)    |        |        |       |        |
|                     |          | BW  | 182 | 128.99          | 3.5:7)    | 6823   | -1.268 | -0.07 | 0.205  |
|                     | 3m       | BSA | 51  | 112.34          | 5(2:7.5)  |        |        |       |        |
|                     |          | BW  | 139 | 89.32           | 3(1:5)    | 2685.5 | -2.573 | -0.20 | 0.010  |
|                     | 9m       | BSA | 31  | 90.63           | 3(2:5)    |        |        |       |        |
|                     |          | BW  | 120 | 72.22           | 2(0:4.5)  | 1406.5 | -2.123 | -0.17 | 0.034  |
| HADS A              | Present. | BSA | 94  | 155.83          | 8(4:12)   |        |        |       |        |
|                     |          | BW  | 185 | 131.96          | 6(3:9)    | 7207   | -2.342 | -0.14 | 0.019  |
|                     | 3m       | BSA | 57  | 117.46          | 7.5(5:12) |        |        |       |        |
|                     |          | BW  | 144 | 94.38           | 5(3:9)    | 3165.5 | -2.531 | -0.21 | 0.011  |
|                     | 9 m      | BSA | 33  | 87.06           | 6(2:9)    |        |        |       |        |
|                     |          | BW  | 124 | 76.85           | 5(2:8)    | 1780   | -1.150 | -0.09 | 0.250  |

**Supplementary Table 3 Ethnic differences in reporting of physical symptoms**

| Problem              |              |     | n=  | No  | %    | Yes | %    | X <sup>2</sup> |
|----------------------|--------------|-----|-----|-----|------|-----|------|----------------|
| Pain                 | Presentation | BSA | 88  | 37  | 42   | 51  | 58   |                |
|                      |              | BW  | 180 | 121 | 67   | 59  | 32.8 | 0.0001         |
|                      | 3 months     | BSA | 53  | 14  | 26.4 | 39  | 73.6 |                |
|                      |              | BW  | 141 | 92  | 65.2 | 49  | 34.8 | 0.0001         |
|                      |              | BSA | 31  | 12  | 38.7 | 19  | 61.3 |                |
|                      |              | BW  | 121 | 80  | 66.1 | 41  | 33.9 | 0.009          |
| Nausea               | Presentation | BSA | 83  | 56  | 68   | 27  | 32.5 |                |
|                      |              | BW  | 178 | 141 | 79   | 37  | 20.8 | 0.058          |
|                      | 3 months     | BSA | 54  | 29  | 53.7 | 25  | 46.3 |                |
|                      |              | BW  | 140 | 91  | 65   | 49  | 35   | 0.198          |
|                      |              | BSA | 29  | 22  | 75.9 | 7   | 24.1 |                |
|                      |              | BW  | 121 | 104 | 86   | 17  | 14   | 0.574          |
| Getting around       | Presentation | BSA | 85  | 59  | 69   | 26  | 30.6 |                |
|                      |              | BW  | 177 | 155 | 88   | 22  | 12.4 | 0.001          |
|                      | 3 months     | BSA | 55  | 33  | 60   | 22  | 40   |                |
|                      |              | BW  | 140 | 112 | 80   | 28  | 20   | 0.007          |
|                      |              | BSA | 31  | 23  | 74.2 | 8   | 25.8 |                |
|                      |              | BW  | 120 | 95  | 79.2 | 25  | 20.8 | 0.724          |
| Bathing and dressing | Presentation | BSA | 86  | 62  | 72   | 24  | 27.9 |                |
|                      |              | BW  | 178 | 167 | 94   | 11  | 6.2  | 0.0001         |
|                      | 3 months     | BSA | 55  | 42  | 76.4 | 13  | 23.6 |                |
|                      |              | BW  | 140 | 129 | 92.1 | 11  | 7.9  | 0.006          |
|                      |              | BSA | 31  | 25  | 80.6 | 6   | 19.4 |                |
|                      |              | BW  | 120 | 104 | 86.7 | 16  | 13.3 | 0.574          |
| Mouth sores          | Presentation | BSA | 87  | 66  | 76   | 21  | 24.1 |                |
|                      |              | BW  | 179 | 167 | 93   | 12  | 6.7  | 0.0001         |
|                      | 3 months     | BSA | 55  | 37  | 67.3 | 18  | 32.7 |                |
|                      |              | BW  | 140 | 114 | 81.4 | 26  | 18.6 | 0.053          |
|                      |              | BSA | 31  | 25  | 80.6 | 6   | 19.4 |                |
|                      |              | BW  | 121 | 109 | 90.1 | 12  | 9.9  | 0.255          |
| Fevers               | Presentation | BSA | 87  | 69  | 79   | 18  | 20.7 |                |
|                      |              | BW  | 177 | 172 | 97   | 5   | 2.8  | 0.0001         |
|                      | 3 months     | BSA | 54  | 42  | 77.8 | 12  | 22.2 |                |
|                      |              | BW  | 139 | 127 | 91.4 | 12  | 8.6  | 0.020          |
|                      |              | BSA | 31  | 26  | 83.9 | 5   | 16.1 |                |
|                      |              | BW  | 119 | 108 | 90.8 | 11  | 9.2  | 0.436          |
| Skin                 | Presentation | BSA | 84  | 42  | 50   | 42  | 50   |                |
|                      |              | BW  | 179 | 156 | 87   | 23  | 12.8 | 0.0001         |
|                      | 3 months     | BSA | 56  | 26  | 46.4 | 30  | 53.6 |                |
|                      |              | BW  | 142 | 96  | 67.8 | 46  | 32.4 | 0.009          |
|                      |              | BSA | 31  | 16  | 51.6 | 15  | 48.4 |                |
|                      |              | BW  | 121 | 86  | 71.1 | 35  | 28.9 | 0.065          |



**Are depressive symptoms more common among British South Asian compared to British White cancer patients?: a cross sectional survey.**

|                                    |                                                                                                                                                                                                                                                                                                                                                                                                                                                                        |
|------------------------------------|------------------------------------------------------------------------------------------------------------------------------------------------------------------------------------------------------------------------------------------------------------------------------------------------------------------------------------------------------------------------------------------------------------------------------------------------------------------------|
| Journal:                           | <i>BMJ Open</i>                                                                                                                                                                                                                                                                                                                                                                                                                                                        |
| Manuscript ID:                     | bmjopen-2013-002650.R1                                                                                                                                                                                                                                                                                                                                                                                                                                                 |
| Article Type:                      | Research                                                                                                                                                                                                                                                                                                                                                                                                                                                               |
| Date Submitted by the Author:      | 09-Apr-2013                                                                                                                                                                                                                                                                                                                                                                                                                                                            |
| Complete List of Authors:          | Lord, Karen; University Hospitals of Leicester NHS Trust, Oncology<br>Ibrahim, Kausher; University Hospitals of Leicester NHS Trust, Oncology<br>Kumar, Sawan; University Hospitals of Leicester NHS Trust, Oncology<br>Mitchell, Alex; University of Leicester, Cancer Studies and Molecular<br>Medicine<br>Rudd, Nicky; University Hospitals of Leicester NHS Trust, Oncology<br>Symonds, Raymond; University of Leicester, Cancer Studies and Molecular<br>Medicine |
| <b>Primary Subject<br>Heading</b>: | Oncology                                                                                                                                                                                                                                                                                                                                                                                                                                                               |
| Secondary Subject Heading:         | Mental health, Palliative care                                                                                                                                                                                                                                                                                                                                                                                                                                         |
| Keywords:                          | MENTAL HEALTH, Adult oncology < ONCOLOGY, Adult palliative care < PALLIATIVE CARE, Ethnicity, Depression                                                                                                                                                                                                                                                                                                                                                               |
|                                    |                                                                                                                                                                                                                                                                                                                                                                                                                                                                        |

SCHOLARONE™  
Manuscripts

Only



1  
2  
3 **Are depressive symptoms more common among British**  
4  
5  
6 **South Asian compared to British White cancer**  
7  
8  
9 **patients?: a cross sectional survey**  
10

11  
12  
13  
14 Karen Lord<sup>1</sup>, Kausher Ibrahim<sup>1</sup>, Sawan Kumar<sup>1</sup>, Alex J. Mitchell<sup>1,2</sup>, Nicky Rudd<sup>1</sup>,  
15  
16 R Paul. Symonds<sup>2</sup>  
17

18  
19  
20  
21 <sup>1</sup>Department of Oncology, University Hospitals of Leicester NHS Trust,  
22  
23 Leicester Royal Infirmary, Leicester LE1 5WW UK  
24

25  
26  
27 <sup>2</sup>Department of Cancer Studies and Molecular Medicine, University of Leicester,  
28  
29 Osborne Building, Leicester, Leicester Royal Infirmary LE1 5WW UK  
30  
31

32  
33  
34  
35  
36 Corresponding author –

37  
38 R Paul Symonds  
39 University of Leicester  
40 Department of Cancer Studies & Molecular Medicine  
41 Osborne Building  
42 Leicester Royal Infirmary  
43 Leicester  
44 LE1 5WW  
45 UK  
46 Email rps8@le.ac.uk  
47 Tel 0116 258 6294  
48 Fax 0116 258 7599  
49  
50

51  
52  
53 **Key words** Cancer, ethnicity, South Asian, anxiety, depression  
54

55 **Word count** 4459  
56  
57  
58  
59  
60

## **Abstract**

### **Objectives**

This cross sectional survey investigated whether there were ethnic differences in depressive symptoms among British South Asian (BSA) cancer patients compared to British White (BW) patients during nine months following presentation at a UK Cancer Centre. We examined associations between depressed mood coping strategies and the burden of symptoms.

### **Design**

Questionnaires were administered to 94 BSA and 185 BW recently diagnosed cancer patients at baseline at three and nine months. 53.8% of the BSA sample were born in the Indian subcontinent, 33% in Africa and 12.9% in the UK. Three screening tools for depression were used to counter concerns about ethnic bias and validity in linguistic translation. The Hospital Anxiety and Depression Scale (HADS), Patient Health Questionnaire (PHQ9) (both validated in Gujarati), Emotion Thermometers (including the Distress Thermometer and checklist), Mini-MAC and the newly developed Cancer Insight and Denial questionnaire were completed.

### **Setting**

Leicestershire Cancer Centre, UK.

### **Participants**

94 BSA and 185 BW recently diagnosed cancer patients.

### **Results**

BSA self reported significantly higher rates of depressive symptoms compared to BW patients longitudinally (HADS  $D \geq 8$ : presentation: BSA 35.1% v BW 16.8%  $p=0.001$ ; 3 months BSA 45.6% v BW 20.8%  $p=0.001$ ; 9 months BSA

1  
2  
3 40.6% v BW 15.3% p=0.004). BSA patients used potentially maladaptive  
4 coping strategies more frequently than BW patients at baseline  
5  
6  
7 (hopelessness/helplessness p=0.005, fatalism p=0.0005, avoidance p=0.005;  
8  
9 the CIDQ denial statement 'I do not really believe I have cancer' p=0.0005).  
10  
11 BSA patients experienced more physical symptoms (DT checklist) which  
12  
13 correlated with ethnic differences in depressive symptoms especially at three  
14  
15 months.  
16  
17

### 18 **Conclusion**

19  
20 Health professionals need to be aware of a greater probability of depressive  
21  
22 symptomatology and how this may present clinically, including somatic  
23  
24 symptoms, in the first nine months after diagnosis if this ethnic disparity in  
25  
26 mental wellbeing is to be addressed.  
27  
28  
29  
30  
31  
32  
33  
34  
35  
36  
37  
38  
39  
40  
41  
42  
43  
44  
45  
46  
47  
48  
49  
50  
51  
52  
53  
54  
55  
56  
57  
58  
59  
60

## Article summary

### Article Focus

- We investigated whether there were differences in depressive symptoms among British South Asian (BSA) cancer patients compared to British White (BW) over a nine month period.
- To limit cultural bias we used multiple questionnaires including HADS and a version of the PHQ-9 developed for India.
- We considered how coping strategies were used and whether physical symptoms affected mood.

### Key Messages

- BSA had twice the self-reported rate of depressive symptoms than BW patients and five times the incidence of severe depression.
- Differences persist for nine months after presentation.
- BSA patients used potentially maladaptive coping strategies far more than BW patients at baseline assessment.
- BSA patients appear to experience a heavier physical symptom burden than BW patients.

### Strengths and Limitations

This is the first comparison of how BSA and BW patients cope with cancer. We have used multiple assessment tools. We have demonstrated statistically very significant differences in the rate of depressive symptoms between the two groups and marked differences in coping style.

BSA clinical staff were involved in the study. In spite of this we had difficulty recruiting and retaining BSA patients, especially by nine months. Changes in

1  
2  
3 mood between the three data collection points are not represented. It is also  
4  
5 likely that the rates of depressive symptoms are under-reported since  
6  
7 anecdotally those who were most distressed often did not feel able to participate  
8  
9 in this study. Self-reported questionnaires indicate the presence of depressive  
10  
11 symptoms but given the absence of psychiatric interviews this is not diagnostic  
12  
13 of a depressive disorder.  
14  
15  
16  
17  
18  
19  
20  
21  
22  
23  
24  
25  
26  
27  
28  
29  
30  
31  
32  
33  
34  
35  
36  
37  
38  
39  
40  
41  
42  
43  
44  
45  
46  
47  
48  
49  
50  
51  
52  
53  
54  
55  
56  
57  
58  
59  
60

## **Introduction**

Depression is one of the strongest determinants of health related quality of life and it also influences medical care and participation in treatment.[1, 2] It may also be linked with other serious outcomes including mortality.[3] The point prevalence of major depression at any time in the first two years following a cancer diagnosis is 14.9% by DSMIV criteria.[4] This is two to four times that observed in the general population using equivalent criteria.[5] An under researched area is the incidence of depression in ethnic minority patients.

Some research suggests that UK ethnic minorities may be more vulnerable to mental illness within the general population than the majority host population[6] leaving the largely unproven impression that they also suffer more distress when diagnosed with cancer. However ethnic minorities may be less likely to receive high quality care.[7, 8] Inequalities in access to care, receipt of treatment and mortality are particularly striking among ethnic minorities, the elderly and those with mental ill health in both the UK [9, 10, 11] and the USA [12, 13, 14] where it is a governmental aspiration to remove such disparities. In England and Wales (total population 56.1 million) those classified as Indians [15] are in the majority accounting for 1,412,958, Pakistan 1,124,511 and Bangladesh 447,201.[16] Most of the Indians born in Africa became refugees, being expelled by Idi Amin and others in East African states

The city of Leicester has one of the highest concentrations of this population (total population: 329,836: Indian 93,000, Pakistani, 8,000, Bangladeshi, 3,600) which contrast with the surrounding county (total population: 650,489: Indian 54,000, Pakistani, 2,100, Bangladeshi, 2,300).[16] We define 'British South

1  
2  
3 Asian (BSA)' as a person whose ancestry is in the Indian subcontinent, and who  
4 identifies with, or is identified with, their host country, Britain. A previous pilot  
5 study showed a significantly higher incidence in symptoms of depression among  
6 BSA patients in Leicester and local county compared to British White (BW)  
7 patients via HADS D  $\geq 10$  (BSA 20.7%; BW 10.4%  $p=0.001$ ).<sup>[17]</sup> Depression  
8 was associated with certain coping styles, particularly the use of denial in both  
9 BSA and BW patients but was employed more frequently by BSA patients.  
10  
11  
12  
13  
14  
15  
16  
17  
18  
19

20 The findings of our pilot study <sup>[17]</sup> 16 were consistent with the few publications  
21 reporting the incidence of depression or distress in ethnic minority cancer  
22 patients. The largest is a meta-analysis of 21 papers which found that US  
23 Hispanic patients were significantly more distressed ( $p=0.0001$ ) and depressed  
24 ( $p=0.04$ ) than the majority population.<sup>[18]</sup>  
25  
26  
27  
28  
29  
30  
31  
32  
33

34 Similar findings were reported from Canada with more distress amongst ethnic  
35 minorities (E and SE Asia, South Asian, First Nation) compared to the majority  
36 population (European, Canadian, British  $p=0.0001$ ). Greater distress was also  
37 found among those with lower income ( $p=0.001$ ).<sup>[19]</sup>  
38  
39  
40  
41  
42  
43  
44

45 This study addressed how the UK's largest ethnic minority population (BSA)  
46 cope with cancer, in comparison to the host population, by analysing data from  
47 a sample of those attending the Leicestershire Cancer Centre.  
48  
49  
50  
51  
52

53 Feeling distressed or low in mood are initial emotional responses to a diagnosis  
54 of cancer, and is part of normal adjustment, if of short duration. If, however  
55  
56  
57  
58  
59  
60

1  
2  
3 distress persists it can have a harmful effect on the mental wellbeing of the  
4  
5 individual risking depressive symptoms [17, 20] and reduction in quality of  
6  
7 life.[21, 22, 23]  
8  
9

10  
11 The Transactional Model of Stress and Coping requires an assessment of  
12  
13 personality traits within the context of their environment.[24] For cancer patients  
14  
15 this environment includes their beliefs about cancer, their level of social support,  
16  
17 proficiency in host languages, level of literacy, degree of disability, co-  
18  
19 morbidities, spiritual beliefs, cultural background and economic  
20  
21 circumstances.[25]  
22  
23  
24  
25

26  
27 The symptom burden on cancer patients can influence coping with a close  
28  
29 interrelationship with psychological wellbeing. Fatigue and disabilities  
30  
31 independently predicted depression among lung cancer patients commencing  
32  
33 treatment [26] and has been observed in pre-chemotherapy patients with  
34  
35 curative cancer.[27] A high symptom burden can persist over time. 1 in 4  
36  
37 patients (n=4903) had a high symptom burden 1 year post diagnosis with  
38  
39 depression, fatigue and pain having the greatest impact on their quality of  
40  
41 life.[28] Similarly a high symptom burden at 12 months was reported among  
42  
43 patients referred for control of pain and depression (n=405).[29] Among  
44  
45 Chinese breast cancer patients (n=285) less distress from physical symptoms  
46  
47 immediately after surgery predicted psychological resilience. The study  
48  
49 suggested that ineffective symptom control during treatment increased a  
50  
51 women's risk of persistent psychological distress longitudinally. The value of  
52  
53 pre-operative interventions was highlighted.[30]  
54  
55  
56  
57  
58  
59  
60



1  
2  
3  
4  
5 Of particular concern are reports of higher symptom burden in ethnic minorities  
6 such as among Hispanic women post-chemotherapy for breast cancer [31] and  
7 greater 'unmet need' for symptom control was implicated among Black and  
8 Spanish speaking Hispanic women with breast cancer than White women.[32]  
9  
10  
11  
12  
13

14  
15  
16 We report the longitudinal incidence of depressive symptoms among a sample  
17 of BSA and BW patients. Coping styles and the burden of patient problems  
18 were examined to determine if they were implicated in depressive symptoms.  
19  
20  
21

### 22 **Hypotheses**

23  
24 On the basis of our literature review and pilot studies we hypothesized that  
25 more BSA cancer patients would self report depressive symptoms than BW  
26 patients over time. We further hypothesized that both a greater use of  
27 potentially maladaptive coping strategies and a heavier symptom burden, would  
28 reflect higher rates of depressive symptoms.  
29  
30  
31  
32  
33  
34  
35  
36  
37  
38

### 39 **Methods**

#### 40 **Study procedures**

41  
42 279 patients, who were aware they had cancer, were recruited at the  
43 Leicestershire Cancer Centre between September 2007 and January 2010 at  
44 their first or second appointment. Patients were recruited by either an English  
45 speaking clinical nurse specialist or one of two radiographers, who between  
46 them spoke English, Gujarati and Hindi and Urdu. None were involved in the  
47 clinical care of the patients and all received training in 'Good Clinical Practice'  
48  
49  
50  
51  
52  
53  
54  
55  
56  
57  
58  
59  
60

1  
2  
3 and in the principles of informed consent. The Leicestershire,  
4  
5 Northamptonshire and Rutland Ethics Committee approved the study.  
6  
7 Eligible patients were aged 18-85 with a confirmed diagnosis of cancer with  
8  
9 evidence of being informed of the diagnosis. They were identified by the nurse  
10  
11 specialist via the cancer registry with ethnicity confirmed by their surname and  
12  
13 by hospital records.  
14

15  
16  
17  
18 Prior to their attendance eligible patients were sent an introductory letter  
19  
20 outlining the study and inviting them to participate. All correspondence and  
21  
22 questionnaires were available in English, Gujarati and Hindi. Consent was  
23  
24 sought requesting patients complete three sets of questionnaires in writing, the  
25  
26 first immediately, then at three months and nine month intervals. (Table 1)  
27  
28

### 29 **Questionnaires**

30  
31 Patients completed the Hospital Anxiety and Depression Scale (HADS) [33] and  
32  
33 The Emotion Thermometers [34] which includes the Distress Thermometer [35]  
34  
35 and depression thermometer (Dep T). A problem checklist, included on the  
36  
37 thermometer, identified the patient's symptom burden. All are validated but  
38  
39 were not initially available in Gujarati or Hindi. A commercial company  
40  
41 undertook an iterative back-translation process as described by Brislin.[36] A  
42  
43 version of the Patient Health Questionnaire (PHQ-9), which was already  
44  
45 validated into Gujarati and Hindi having been adapted for use in India, was the  
46  
47 third questionnaire used.[37] Several tools were used to address the concern  
48  
49 that some were ethnically biased.  
50  
51  
52  
53  
54  
55  
56  
57  
58  
59  
60

1  
2  
3 An adaptive coping strategy (fighting spirit) and potentially maladaptive  
4 strategies (hopelessness/helplessness, fatalism, anxiety preoccupation and  
5 cognitive avoidance) were assessed via the Mini-MAC scale.[38] The locally  
6 developed Cancer Insight and Denial questionnaire (CIDQ) included question  
7 38 from the original MAC questionnaire to assess the use of denial. The vast  
8 majority of participants chose to complete the first questionnaires at home,  
9 returning them by post. Subsequent questionnaires were posted to participants.  
10  
11 Personal statements illustrating how patients coped were generated by two  
12 qualitative questions, “how would you describe your current illness”, and “what  
13 does having cancer mean to you?”  
14  
15  
16  
17  
18  
19  
20  
21  
22  
23  
24  
25  
26

### 27 **Statistical analysis**

28 Reference was made to the ‘Strobe’ statement for observational studies.[39]  
29  
30 Depressive symptoms were assessed by HADS D, ET Thermometers and  
31 PHQ-9.  
32  
33  
34  
35  
36  
37

38 The revised classification of the original HADS identified the severity of  
39 depressive symptoms (normal 0-7, mild 8-10, moderate 11-14 and severe 15-  
40 21.[40] A threshold of  $\geq 11$  identified patients with moderate symptoms,  
41 however following the recommendation to have a lower threshold for cancer  
42 patients than in general practice,  $\geq 8$  was selected for HADS D.[41] This is  
43 supported by a review of 747 papers using HADS where the best balance  
44 between sensitivity and specificity was achieved most often when using the cut-  
45 off  $\geq 8$  (Cronbach’s alpha coefficient, 0.80).[42] Threshold scores of  $\geq 10$ ,  $\geq 15$ ,  
46  
47  
48  
49  
50  
51  
52  
53  
54  
55  
56  
57  
58  
59  
60  $\geq 20$  for PHQ-9 were in accordance with the original recommended scores.[43]

1  
2  
3 The current recommended threshold for the DT is  $\geq 4$  and this is retained in the  
4 ET [44] and this analysis. A prior power analysis based on our pilot studies  
5 determined 86 participants were required for each ethnic group.  
6  
7  
8  
9

10  
11 Graphs denote 95% confidence intervals. Summary scores for selected coping  
12 strategies were from the Mini-MAC and the denial indicators in the CIDQ.  
13  
14 Reference was made to individual indicators. Longitudinal data at baseline and  
15 at three and nine months is reported.  
16  
17  
18  
19

20  
21  
22 Computation of frequencies, percentages and arithmetic median was conducted  
23 to identify patterns in the data. Mann Whitney tests for continuous variables  
24 detected differences between the ethnic groups and the direction of these  
25 relationships. Spearman's Rank Order Tests ( $\rho$ ) explored correlations  
26 between depressive symptoms (HADS D as a continuous variable) and  
27 deprivation.[45] We report analysis by age, gender, deprivation, tumour site,  
28 place of birth and ethnicity.  
29  
30  
31  
32  
33  
34  
35  
36  
37  
38  
39

40  
41  $\chi^2$  described the relationship between categorical variables. The extent to  
42 which patients used each coping strategy and how its use changed  
43 longitudinally is described. Associations between each strategy and depressive  
44 symptoms is reported. Qualitative data was recorded verbatim. When in  
45 Gujarati it was translated to English. Analysis was performed via SPSS v 18.  
46  
47  
48  
49  
50  
51

## 52 53 **Results**

54  
55  
56  
57  
58  
59  
60

1  
2  
3 94 BSA patients were recruited. The BSA sample largely represents cancer  
4 patients within the Leicester Indian population and although of interest to other  
5 BSA cancer populations, these findings may not be representative. 53.8% were  
6 born in the Indian subcontinent, 33% in Africa of Indian descent and 12.9% in  
7 the UK. Hindus accounted for 53.2%, Muslims 25.5% and 17% Sikh. 185 BW  
8 patients were recruited. Several cancer sites are represented. The largest  
9 cohort was 114 breast cancer patients. The educational attainment, religion  
10 and place of birth were self-reported by participants. The demographic  
11 characteristics of this sample showed significant differences between ethnic  
12 groups in terms of their socio-economic status and educational attainment.  
13 These details and the patient's sex, age, cancer site and treatment intent are  
14 listed in Table 2.

### **Demographics and depressive symptoms**

15  
16  
17  
18  
19  
20  
21  
22  
23  
24  
25  
26  
27  
28  
29  
30  
31  
32  
33  
34 Age was not associated with depression among BSA patients (rho: HADS D,  
35 (p=0.62). Older BW patients were less likely to be depressed (rho: HADS D  
36 (p=0.03). There was no statistical difference based on gender with females  
37 having a higher mean depression score than males at baseline (HADS D;  
38 females 4 (range 0-18) IQR 1,7) (males 3 (range 0-20) IQR 1,6) p=0.46.  
39  
40  
41  
42  
43  
44  
45  
46

47 67.4% patients received radical treatment with the aim of cure or long term  
48 control of disease and 32.6% received palliative treatment given with no  
49 expectation of cure. Unexpectedly there was no evidence that receiving  
50 palliative as opposed to radical (curative intent) treatment influenced a  
51 difference in depressive symptoms (HADS D $\geq$ 8 presentation p=0.088, 3 months  
52  
53  
54  
55  
56  
57  
58  
59  
60

1  
2  
3 p=0.588 9 months p=1.0). Those with lung cancer, who generally have a poor  
4  
5 prognosis, had the highest median depression score via HADS D of 5 (IQR  
6  
7 3,7, scale 0-21). The lowest score was attributed to people with prostate cancer  
8  
9 (Md 1 (IQR 0,5) (Supp. Table 1).  
10  
11

12  
13  
14 Data on educational attainment was recoded into two groups with those patients  
15  
16 reaching educational level of 15/16 removed. This represented groups at either  
17  
18 end of educational attainment. Those educated at the highest level had notably  
19  
20 less depressive symptoms than those with either no formal education or only  
21  
22 until up to the age of 11 (HADS D  $\geq$ 8, Lowest Ed. 14/30 (46.7%); Highest Ed.  
23  
24 18/97 (18.6%) p=0.004. However these results should be treated with caution  
25  
26 given the educational systems of India and the UK are different. For example  
27  
28 some patients listing no formal education spoke fluently up to five languages.  
29  
30 Individual results in patients who reported little formal education were consistent  
31  
32 across assessment tools suggesting adequate comprehension.  
33  
34  
35  
36  
37

38  
39 There was no significant difference in depressive symptoms between those  
40  
41 BSA patients originating from Africa compared to the Indian Sub continent at  
42  
43 baseline (MW: Africa 31/80 Md 4 (2,9) Indian Sub Continent Md 5.5 (2,11) Z=-  
44  
45 1.184 p=0.23). Neither was there a significant difference in the experience of  
46  
47 symptoms frequently associated with depression such as pain (p=0.23), sleep  
48  
49 disturbances (p=0.91) and fatigue (p=0.52).  
50  
51

52  
53  
54 Since socio-economic deprivation is closely associated with being a member of  
55  
56 an ethnic minority we considered the extent to which deprivation influenced the  
57  
58  
59  
60

1  
2  
3 strength of the relationship between ethnicity and depressive symptoms.  
4  
5 Although there was a strong association between ethnicity and deprivation (MW  
6  
7  $r=0.503$ ,  $p=0.0005$ ) deprivation had minimal influence on the strength of the  
8  
9 relationship between ethnicity and depression when comparing Pearson  
10  
11 product-moment correlations (PCC) with partial correlation calculations (Table  
12  
13  
14 3).

### 15 16 17 18 **Depressive symptoms at baseline**

19  
20 All three assessment tools showed approximately double the incidence of  
21  
22 depression in BSA patients compared to BW patients (Fig 1a and suppl. Table  
23  
24 2). Severe depression was also more common in the BSA groups as  
25  
26 demonstrated using a higher HADS score  $\geq 11$  (BSA 23/94 (24.5%) BW 11/185  
27  
28 (5.9%)  $p=0.001$ ). A similar trend was seen using a higher PHQ-9 threshold  
29  
30 ( $\geq 15$ ) BSA 13/85 (15%) BW 10/173 (5%)  $p=0.04$ .  
31  
32  
33  
34  
35

### 36 37 **Longitudinal trends in depressive symptoms**

38  
39 All tools indicated how more vulnerable BSA patients were in contrast to BW  
40  
41 patients. HADS D  $\geq 8$  suggested significantly higher rates of depressive  
42  
43 symptoms among BSA patients longitudinally than BW patients (Fig 1b). All  
44  
45 three assessment tools indicated a slight decrease in depressive symptoms  
46  
47 among BSA patients at three months. Depression rates had not fallen lower  
48  
49 than those at presentation by nine months although the ethnic difference  
50  
51 remained (Fig 1c & 1d).  
52  
53  
54  
55

### 56 57 **Coping Strategies**

58  
59  
60

1  
2  
3 BSA patients used coping strategies differently to BW patients particularly early  
4  
5 after diagnosis when greater use of potentially maladaptive strategies were  
6  
7 associated with higher rates of depressive symptoms (Suppl tables 3, 4 & 5)  
8  
9

### 10 11 12 **Hopelessness/ helplessness (Mini MAC)**

13  
14 *"its an awful thing to happen....feeling hopeless"*

15  
16 BSA patient No.16 soon after diagnosis  
17  
18

19  
20  
21 Although initially the majority of patients did not express helplessness nor  
22  
23 hopelessness, BSA patients were far more likely to do so (p=0.0005). For  
24  
25 example, more BSA patients than BW patients agreed with the statement 'I feel  
26  
27 completely at a loss about what to do' (BSA 31 (33%); BW 23(12.4%)  
28  
29 p=0.0005). Across the study period BSA patients had higher  
30  
31 helplessness/hopelessness scores than BW patients although use decreased  
32  
33 over time for both groups (Fig 2a). Helplessness/hopelessness is sometimes  
34  
35 considered to be a substitute for depression so it was not surprising that over  
36  
37 time more patients (BSA and BW combined) felt helplessness/hopelessness  
38  
39 and also acknowledged depressive symptoms (MW: PHQ-9  $\geq 11$ /HADS D  $\geq 8$   
40  
41 p=0.0005).  
42  
43  
44  
45  
46

### 47 **Anxiety preoccupation**

48  
49 *"Cancer has totally changed my life. I am worried, anxious about my treatment*  
50  
51 *and what lies ahead as this is the second occasion I am going through this"*  
52  
53

54 BSA No.103.  
55  
56  
57  
58  
59  
60



1  
2  
3 There was a negligible ethnic difference in the use of anxiety preoccupation.  
4  
5 Over time this strategy was used less (Fig 2b). It was strongly associated with  
6  
7 depression (HADS D and PHQ-9,  $p=0.0005$ ). These patients were more likely  
8  
9 to report depressive symptoms longitudinally (PHQ-9: presentation  $p=0.0005$ , 3  
10  
11 months  $p=0.0005$ , 9 months  $p=0.0005$ ).  
12  
13

### 14 15 16 **Cognitive avoidance**

17  
18 Cancer is “...something that I put to the back of my mind and don't let it interfere  
19  
20 with my day to day life” BW No.118  
21  
22

23  
24  
25 Initially BSA patients used cognitive avoidance to cope more than BW patients  
26  
27 (MW:  $p=0.0005$ ) (Fig 2c). For example, ‘I deliberately push all thoughts of  
28  
29 cancer out of my mind’ (BSA 61/93 (65.6%); BW 63/185 (34.4%),  $p=0.0005$ ).  
30  
31 Over time this ethnic difference continued but was only statistically significant at  
32  
33 baseline as illustrated by a comparison of median scores (Fig 2c). At baseline,  
34  
35 as one sample, those who used cognitive avoidance were more likely to have  
36  
37 symptoms of depression (MW: PHQ-9  $p=0.007$ ; HADS D  $\geq 8$   $p=0.001$ ; Dep.T  $\geq 4$   
38  
39  $p=0.002$ ). Over time avoidant patients did not continue to be depressed (HADS  
40  
41 D; 3 months,  $p=0.2$ ; 9 months, 0.14).  
42  
43  
44  
45  
46

### 47 **Fighting Spirit**

48  
49 (I see cancer) “as a challenge...a temporary state....a hurdle to get over”  
50  
51

52  
53 BW patient No.172

54  
55 “It means I have a fight on my hands but I'm determined to get better”  
56

57  
58  
59  
60  
61  
62  
63  
64  
65  
66  
67  
68  
69  
70  
71  
72  
73  
74  
75  
76  
77  
78  
79  
80  
81  
82  
83  
84  
85  
86  
87  
88  
89  
90  
91  
92  
93  
94  
95  
96  
97  
98  
99  
100  
101  
102  
103  
104  
105  
106  
107  
108  
109  
110  
111  
112  
113  
114  
115  
116  
117  
118  
119  
120  
121  
122  
123  
124  
125  
126  
127  
128  
129  
130  
131  
132  
133  
134  
135  
136  
137  
138  
139  
140  
141  
142  
143  
144  
145  
146  
147  
148  
149  
150  
151  
152  
153  
154  
155  
156  
157  
158  
159  
160  
161  
162  
163  
164  
165  
166  
167  
168  
169  
170  
171  
172  
173  
174  
175  
176  
177  
178  
179  
180  
181  
182  
183  
184  
185  
186  
187  
188  
189  
190  
191  
192  
193  
194  
195  
196  
197  
198  
199  
200  
201  
202  
203  
204  
205  
206  
207  
208  
209  
210  
211  
212  
213  
214  
215  
216  
217  
218  
219  
220  
221  
222  
223  
224  
225  
226  
227  
228  
229  
230  
231  
232  
233  
234  
235  
236  
237  
238  
239  
240  
241  
242  
243  
244  
245  
246  
247  
248  
249  
250  
251  
252  
253  
254  
255  
256  
257  
258  
259  
260  
261  
262  
263  
264  
265  
266  
267  
268  
269  
270  
271  
272  
273  
274  
275  
276  
277  
278  
279  
280  
281  
282  
283  
284  
285  
286  
287  
288  
289  
290  
291  
292  
293  
294  
295  
296  
297  
298  
299  
300  
301  
302  
303  
304  
305  
306  
307  
308  
309  
310  
311  
312  
313  
314  
315  
316  
317  
318  
319  
320  
321  
322  
323  
324  
325  
326  
327  
328  
329  
330  
331  
332  
333  
334  
335  
336  
337  
338  
339  
340  
341  
342  
343  
344  
345  
346  
347  
348  
349  
350  
351  
352  
353  
354  
355  
356  
357  
358  
359  
360  
361  
362  
363  
364  
365  
366  
367  
368  
369  
370  
371  
372  
373  
374  
375  
376  
377  
378  
379  
380  
381  
382  
383  
384  
385  
386  
387  
388  
389  
390  
391  
392  
393  
394  
395  
396  
397  
398  
399  
400  
401  
402  
403  
404  
405  
406  
407  
408  
409  
410  
411  
412  
413  
414  
415  
416  
417  
418  
419  
420  
421  
422  
423  
424  
425  
426  
427  
428  
429  
430  
431  
432  
433  
434  
435  
436  
437  
438  
439  
440  
441  
442  
443  
444  
445  
446  
447  
448  
449  
450  
451  
452  
453  
454  
455  
456  
457  
458  
459  
460  
461  
462  
463  
464  
465  
466  
467  
468  
469  
470  
471  
472  
473  
474  
475  
476  
477  
478  
479  
480  
481  
482  
483  
484  
485  
486  
487  
488  
489  
490  
491  
492  
493  
494  
495  
496  
497  
498  
499  
500  
501  
502  
503  
504  
505  
506  
507  
508  
509  
510  
511  
512  
513  
514  
515  
516  
517  
518  
519  
520  
521  
522  
523  
524  
525  
526  
527  
528  
529  
530  
531  
532  
533  
534  
535  
536  
537  
538  
539  
540  
541  
542  
543  
544  
545  
546  
547  
548  
549  
550  
551  
552  
553  
554  
555  
556  
557  
558  
559  
560  
561  
562  
563  
564  
565  
566  
567  
568  
569  
570  
571  
572  
573  
574  
575  
576  
577  
578  
579  
580  
581  
582  
583  
584  
585  
586  
587  
588  
589  
590  
591  
592  
593  
594  
595  
596  
597  
598  
599  
600  
601  
602  
603  
604  
605  
606  
607  
608  
609  
610  
611  
612  
613  
614  
615  
616  
617  
618  
619  
620  
621  
622  
623  
624  
625  
626  
627  
628  
629  
630  
631  
632  
633  
634  
635  
636  
637  
638  
639  
640  
641  
642  
643  
644  
645  
646  
647  
648  
649  
650  
651  
652  
653  
654  
655  
656  
657  
658  
659  
660  
661  
662  
663  
664  
665  
666  
667  
668  
669  
670  
671  
672  
673  
674  
675  
676  
677  
678  
679  
680  
681  
682  
683  
684  
685  
686  
687  
688  
689  
690  
691  
692  
693  
694  
695  
696  
697  
698  
699  
700  
701  
702  
703  
704  
705  
706  
707  
708  
709  
710  
711  
712  
713  
714  
715  
716  
717  
718  
719  
720  
721  
722  
723  
724  
725  
726  
727  
728  
729  
730  
731  
732  
733  
734  
735  
736  
737  
738  
739  
740  
741  
742  
743  
744  
745  
746  
747  
748  
749  
750  
751  
752  
753  
754  
755  
756  
757  
758  
759  
760  
761  
762  
763  
764  
765  
766  
767  
768  
769  
770  
771  
772  
773  
774  
775  
776  
777  
778  
779  
780  
781  
782  
783  
784  
785  
786  
787  
788  
789  
790  
791  
792  
793  
794  
795  
796  
797  
798  
799  
800  
801  
802  
803  
804  
805  
806  
807  
808  
809  
810  
811  
812  
813  
814  
815  
816  
817  
818  
819  
820  
821  
822  
823  
824  
825  
826  
827  
828  
829  
830  
831  
832  
833  
834  
835  
836  
837  
838  
839  
840  
841  
842  
843  
844  
845  
846  
847  
848  
849  
850  
851  
852  
853  
854  
855  
856  
857  
858  
859  
860  
861  
862  
863  
864  
865  
866  
867  
868  
869  
870  
871  
872  
873  
874  
875  
876  
877  
878  
879  
880  
881  
882  
883  
884  
885  
886  
887  
888  
889  
890  
891  
892  
893  
894  
895  
896  
897  
898  
899  
900  
901  
902  
903  
904  
905  
906  
907  
908  
909  
910  
911  
912  
913  
914  
915  
916  
917  
918  
919  
920  
921  
922  
923  
924  
925  
926  
927  
928  
929  
930  
931  
932  
933  
934  
935  
936  
937  
938  
939  
940  
941  
942  
943  
944  
945  
946  
947  
948  
949  
950  
951  
952  
953  
954  
955  
956  
957  
958  
959  
960  
961  
962  
963  
964  
965  
966  
967  
968  
969  
970  
971  
972  
973  
974  
975  
976  
977  
978  
979  
980  
981  
982  
983  
984  
985  
986  
987  
988  
989  
990  
991  
992  
993  
994  
995  
996  
997  
998  
999  
1000

1  
2  
3  
4  
5 A large number of patients in both ethnic groups approached their illness with  
6 an 'adaptive' coping strategy of 'fighting spirit' (Fig 2d). For example, 'I am  
7 determined to beat this disease' (BSA 85/93 (91.4%); BW 170/185 (91.9%)  
8  $p=1.0$ ). There was little ethnic difference in the extent to which patients used  
9 this coping strategy (MW presentation  $p=0.47$ , 3 months  $p=0.57$ , 9 months  
10  $p=0.2$ ).

### 11 12 13 14 15 16 17 18 **Fatalism**

19  
20 *"It's horrible. Why me? My mum died from cancer. My sisters have cancer.*

21  
22 *Why is this happening? I wish I'd never woken up after my operation"*

23  
24  
25 BSA No.125

26  
27  
28  
29 More BSA patients were fatalistic when diagnosed with cancer than BW patients  
30 at baseline assessment (MW:  $p=0.0005$ ). However this was largely based on  
31 one of five Mini MAC indicators, 'I've put myself in the hands of God' (BSA  
32 71/94 (75.5%); BW 60/185(32.4%)  $p=0.0005$ ). There was a gradual decrease in  
33 fatalism in both ethnic groups by nine months although it persisted among BSA  
34 patients (Fig 2e). Those who were fatalistic were more likely to experience  
35 depressive symptoms (MW: HADS D $\geq$ 8  $p=0.024$ ; PHQ-9,  $p=0.003$ ) but not by  
36 the Dep T.  $\geq$ 4 ( $p=0.101$ ).

### 37 38 39 40 41 42 43 44 45 46 47 **Insight and Denial (CIDQ)**

48  
49 *"I'm not ill"*

50  
51  
52 Written at the top of an uncompleted questionnaire by a patient having  
53 chemotherapy for breast cancer following surgery. BW No.127 at presentation  
54  
55  
56  
57  
58  
59  
60

1  
2  
3 *"...part of me still feels there is nothing wrong with me and this is happening to*  
4 *someone else. This is presumably my way of handling it all."* BW No.311 at  
5  
6  
7 nine months  
8  
9

10  
11 Of those who used denial, potentially a maladaptive coping strategy [46] BSA  
12 patients were over-represented, most notably at baseline assessments  
13 (p=0.001). The ethnic gap remained longitudinally (Fig 2f). Of the three tools  
14 assessing depression only PHQ-9 indicated an association between denial and  
15 depression albeit weakly (MW: p= 0.039).  
16  
17  
18  
19  
20  
21  
22  
23  
24

25 To facilitate comparisons with Roy's 2005 [17] study, analysis of the single  
26 indicator 'I don't really believe I have cancer' originating from the MAC  
27 questionnaire was repeated. At baseline 229/278 patients (82%) accepted the  
28 reality of their diagnosis by disagreeing with the statement. Of the 27 patients  
29 who didn't believe that they had cancer, more were BSA (BSA 19/93 (20.2%);  
30 BW 8/185 (4.3%), p=0.0001). Of interest is that 23 patients agreed with this  
31 statement 'sometimes' (BSA 12 (52.2%); BW 11 (47.8%)). There was a strong  
32 trend towards BSA patients who denied their diagnosis to be more depressed at  
33 baseline but sample numbers were too low to warrant analysis at nine months  
34 (Fig 2g).  
35  
36  
37  
38  
39  
40  
41  
42  
43  
44  
45  
46  
47  
48  
49  
50  
51  
52  
53  
54  
55  
56  
57  
58  
59  
60

We considered whether causes of distress listed in the distress thermometer  
checklist explained ethnic differences in depressive symptoms. Cancer  
treatments offered to both groups were similar so did not influence findings.  
Critically BSA patients experienced more distress from physical symptoms of

1  
2  
3 illness and treatment than BW patients. There were 17 physical symptoms  
4 listed. In 13 categories BSA had statistically significant increased symptoms  
5 compared to BW patients. For example, pain (BSA 51/83 (58%), BW 59/180  
6 (32.8%)  $p=0.0001$ ), mouth sores (BSA 21/88 (24.1%), BW 12/179 (6.7%)  
7  $p=0.0001$ ) and fevers (BSA 18/87 (20.7%), BW 5/177(2.8%)  $p=0.0001$ ). At  
8 three months significantly higher percentages of BSA patients reported  
9 problems with pain, mouth sores, nausea, skin, washing and dressing and  
10 getting around as causes for distress which were not reflected in BW patients.  
11 By nine months differences had narrowed with the exception of pain (BSA 19/31  
12 (61.3%) v BW 41/121 (33.9%)  $p=0.009$ ) (Table 4).  
13  
14  
15  
16  
17  
18  
19  
20  
21  
22  
23  
24  
25  
26

## 27 **Discussion**

28  
29 With the exception of our pilot study [17] we are not aware of another  
30 comparison of how BSA and BW patients cope with cancer. It should be of  
31 major concern to health care policy makers in the UK that this study provides  
32 evidence that there is a higher prevalence of depressive symptoms among BSA  
33 patients soon after the cancer diagnosis than BW patients. The percentages  
34 vary depending on the assessment tool used but all showed the same trend.  
35  
36 BSA rates for depression were twice that of BW patients using two tools. 35.1%  
37 of BSA compared to 16.8% of BW patients ( $p=0.001$ ) had depressive symptoms  
38 measured on the HADS D scale ( $\geq 8$ ). This was confirmed on a version of the  
39 PHQ-9 $\geq 10$  developed for India (35.3% BSA v 18.3% BW  $p=0.05$ ). This is a  
40 critical finding since this is almost 6 times higher than reported within the UK  
41 general population using the same assessment tool (6%).[47] Depression rates  
42 for BW patients (HADS D $\geq 8$ , 16.8%; PHQ-9 18.3%) were similar to those  
43  
44  
45  
46  
47  
48  
49  
50  
51  
52  
53  
54  
55  
56  
57  
58  
59  
60

1  
2  
3 reported in a recent meta-analysis of cancer patients (16.3%), being  
4  
5 approximately 2.5 times higher than in the general population.[4] What is  
6  
7 disturbing is the incidence of more severe depression in BSA patients which is  
8  
9 reflected in their HAD-D score  $\geq 11$  (BSA 24.5% v BW 5.9%  $p=0.0001$ ). These  
10  
11 findings supported trends in other studies, notably our pilot study. Using the  
12  
13 threshold HADS  $\geq 10$ , Roy [17] reported BSA 20.7% v BW 10.4% ( $p=0.001$ ) had  
14  
15 moderate depressive symptoms. These concur with other reports which  
16  
17 suggest that ethnic minority cancer patients experience more psychological  
18  
19 distress than patients from host populations.[16, 17, 48, 49] However the BSA  
20  
21 population is heterogeneous. It would be grossly simplistic to assume all BSA  
22  
23 respond psychologically in the same way given the breadth and diversity of their  
24  
25 religious and cultural influences. However Indian Hindus comprised the majority  
26  
27 of our BSA sample and our findings may be of particular relevance to this sub-  
28  
29 group.  
30  
31  
32  
33  
34  
35

36 What is very interesting is that the HADS-D, PHQ-9 and DepT showed higher  
37  
38 levels of depressive symptoms in both ethnic groups at three months after  
39  
40 baseline, this being steeper among BSA patients. Although symptoms  
41  
42 decreased, BSA consistently reported higher rates of depression than BW  
43  
44 patients longitudinally. These findings confirmed our first hypothesis.  
45  
46  
47  
48

49 A counter intuitive finding in this study is the similarity of depressive symptoms  
50  
51 in patients being treated with curative intent (radical) and palliative patients.  
52  
53 Although there were fewer questionnaires returned at three and nine months,  
54  
55 the ratio of radical and palliative patients remained the same (HADS D  $\geq 8$   
56  
57  
58  
59  
60

1  
2  
3 baseline p=0.08, 3 months p=0.58, 9 months p=1.0). In fact this finding is  
4  
5 consistent with a recent meta-analysis.[4]  
6  
7

8  
9 At baseline the rates of fatalism helplessness/hopelessness and domains of  
10 denial were far higher among BSA patients and there was a strong correlation  
11 between these potentially maladaptive coping strategies and the incidence of  
12 depression in both ethnic groups. Helplessness/hopelessness is strongly  
13 associated with depression [50, 20, 51–55] as we found in this study. A similar  
14 pattern was seen in the use of cognitive avoidance. Fatalism too was  
15 associated with higher levels of depressive symptoms as demonstrated on both  
16 the PHQ-9 and HADS which supports research from India [56, 57] and the UK  
17 [58, 59] into the use of potentially maladaptive behaviours.  
18  
19  
20  
21  
22  
23  
24  
25  
26  
27  
28  
29

30  
31 In our previous study [17] denial was significantly related to depression in both  
32 BW and BSA patients. BSA patients were far more likely to agree with the  
33 statement in the MAC questionnaire (Question 38) 'I don't really believe I have  
34 cancer'. In this study a minority of patients denied their diagnosis but again it  
35 was more common among BSA patients using the same indicator until nine  
36 months (MW presentation p=0.0005, 3 months p=0.001, 9 months p=0.2).  
37  
38 Initially this was strongly associated with depression however the sample  
39 numbers were too small to consider longitudinal associations.  
40  
41  
42  
43  
44  
45  
46  
47  
48  
49

50  
51 What is puzzling is that although BSA patients remained more depressed than  
52 BW patients longitudinally, by three and nine months the use of coping  
53 strategies did not explain this. At three months the only difference was in  
54  
55  
56  
57  
58  
59  
60

1  
2  
3 helplessness/hopelessness scores ( $p=0.043$ ) and by nine months the ethnic  
4  
5 differences in the use of coping strategies were insignificant. Interestingly by  
6  
7 nine months the trend towards higher depression among BSA patients  
8  
9 remained. Even taking into account a lag time for the alleviation of depressive  
10  
11 symptoms after less use of maladaptive coping, there remains an incomplete  
12  
13 explanation as to why more BSA patients in particular remain so distressed.  
14  
15 Our hypothesis that a greater use of maladaptive coping strategies would reflect  
16  
17 higher rates of depressive symptoms was therefore only partially confirmed. A  
18  
19 retrospective audit into referral to psycho oncology or prescribing patterns of  
20  
21 psychotropic medication in the two groups did not suggest a difference that  
22  
23 could account for this.  
24  
25  
26  
27  
28

29  
30 We considered whether the burden of physical symptoms explained this ethnic  
31  
32 gap. BSA patients were more likely to report physical symptoms at baseline  
33  
34 and at three months. This was particularly true for pain, nausea, skin concerns,  
35  
36 mouth sores, tingling and feeling swollen. These symptoms peaked at three  
37  
38 months but there was no statistically significant difference in symptomatology  
39  
40 between the two groups by nine months with the exception of pain. However  
41  
42 the ethnic differences in depressive symptoms persisted to nine months.  
43  
44 Possible explanations include the somatisation of physical symptoms being  
45  
46 undetected, inadequate symptom management, non-compliance due to a lack  
47  
48 of literacy and language skills or for a patient preference for traditional  
49  
50 medicines for symptom control purposes. Our findings reflect the greater  
51  
52 symptom burden found in other ethnic minority cancer patients, such as among  
53  
54 Chinese and Hispanic populations [31, 32]. This study supports the original  
55  
56  
57  
58  
59  
60

1  
2  
3 hypothesis that more BSA cancer patients would self-report depressive  
4 symptoms than BW patient over time. Our hypothesis that a greater use of  
5 potentially maladaptive coping strategies would reflect higher rates of  
6 depression among BSA patients was supported but only until the three month  
7 point. A heavier symptom burden among BSA patients does appear to  
8 contribute to depression rates among this ethnic minority compared to the host  
9 population.  
10  
11  
12  
13  
14  
15  
16  
17  
18  
19

## 20 Limitations

21  
22  
23  
24  
25 Limitations to the study are acknowledged. The BSA sample largely represents  
26 cancer patients within the Leicester Indian population and although of interest to  
27 other BSA cancer populations, these findings may not represent them. In  
28 addition there was a large sample of patients with breast cancer, which risks  
29 underrepresentation of those patients with other body site cancers.  
30  
31  
32  
33  
34  
35

36 Difficulties in recruitment and retaining BSA participants by nine months  
37 reduced the sample size.[60] Self-reported questionnaires indicate the  
38 presence of depressive symptoms but given the absence of psychiatric  
39 interviews this is not diagnostic of a depressive disorder.  
40  
41  
42  
43  
44  
45

46  
47 Modulations in patient mood between the three data collection points are not  
48 represented. It is also likely that depressive symptoms are underreported since  
49 anecdotally those who were most distressed often did not feel able to participate  
50 in the study.  
51  
52  
53  
54  
55  
56  
57  
58  
59  
60



### Recommendations

The decreased use of maladaptive coping strategies among BSA patients in the first few months after diagnosis requires investigation, the aim being to reduce the associated distress earlier along the cancer trajectory. Evidence of greater distress among BSA patients caused by a heavier symptom burden than among BW patients also needs further study since several potential causes are reversible by proactive patient assessments during cancer treatment and follow-up.

### Conclusion

Health professionals need to be aware of a greater probability of depressive symptomatology and how this may present clinically, including somatic symptoms, in the first nine months after diagnosis if this ethnic disparity in mental wellbeing is to be addressed.

## References

1. Kennard BD, Stewart SM, Olvera R, et al. Nonadherence in Adolescent Oncology Patients: Preliminary Data on Psychological Risk Factors and Relationships to Outcome. *J Clin Psychol Med S* 2004;**11**:31-39. DOI 0.1023/B:JOCS.0000016267.21912.74.
2. Steginga SK, Campbell A, Ferguson M, et al. Socio-demographic, psychosocial and attitudinal predictors of help seeking after cancer. *Psychooncology* 2008;**17**:997-1005. DOI 10.1002/pon.1317.
3. Satin JR, Linden W, Phillips MJ. Depression as a predictor of disease progression and mortality in cancer patients: a meta-analysis. *Cancer* 2008;**115**:5349-5361.
4. Mitchell AJ, Chan M, Bhatti H, et al. Prevalence of depression, anxiety, and adjustment disorder in oncological, haematological, and palliative-care settings: a meta-analysis of 94 interview-based studies. *Lancet Oncol* 2011;**12**:160-174. DOI:10.1016/S1470-2045(11)70002-X.
5. Hinz A, Krauss O, Hauss JP, et al. Anxiety and depression in cancer patients compared with the general population. *Eur J Cancer Care* 2010;**19**:522-529. DOI 10.1111/j.1365-2354.2009.01088.x.

- 1  
2  
3 6. Weich S, Nazroo J, Sproston K, et al. Common mental disorders and  
4 ethnicity in England: the EMPIRIC study. *Psychol Med* 2004;**34**:1543-  
5 1551.  
6  
7  
8  
9
- 10  
11  
12 7. Shavers VL, Brown ML. Racial and ethnic disparities in the receipt of  
13 cancer treatment. *J Natl Cancer Inst* 2002;**94**:334-57.  
14  
15  
16  
17
- 18  
19 8. Ward E, Jemal A, Cokkinides V, et al. Cancer disparities by race/ethnicity  
20 and socioeconomic status. *CA Cancer J Clin* 2004;**54**:78-93.  
21  
22  
23  
24
- 25 9. All party parliamentary group on cancer (2009) Report of the all party  
26 parliamentary group of cancer's enquiry into inequalities in cancer  
27 available at [www.appq-cancer.uk](http://www.appq-cancer.uk).  
28  
29  
30  
31  
32  
33
- 34 10. Department of Health (2007), Cancer Reform Strategy available at  
35 [http://www.dh.gov.uk/prod\\_consum\\_dh/groups/dh\\_digitalassets/documen](http://www.dh.gov.uk/prod_consum_dh/groups/dh_digitalassets/documents/digitalasset/dh_081007.pdf)  
36 [ts/digitalasset/dh\\_081007.pdf](http://www.dh.gov.uk/prod_consum_dh/groups/dh_digitalassets/documents/digitalasset/dh_081007.pdf), The Stationery Office, UK.  
37  
38  
39  
40  
41  
42
- 43 11. Department of Health (2011) Improving outcomes a strategy for cancer  
44 via  
45 [http://www.dh.gov.uk/prod\\_consum\\_dh/groups/dh\\_digitalassets/documen](http://www.dh.gov.uk/prod_consum_dh/groups/dh_digitalassets/documents/digitalasset/dh_123394.pdf)  
46 [ts/digitalasset/dh\\_123394.pdf](http://www.dh.gov.uk/prod_consum_dh/groups/dh_digitalassets/documents/digitalasset/dh_123394.pdf), Department of Health, London.  
47  
48  
49  
50  
51  
52
- 53  
54 12. Goss E, Lopez AM, Brown CL, Wollins DS, Brawley OQ, Raghavan D.  
55 American Society of Clinical Oncology policy statement: disparities in  
56  
57  
58  
59  
60

1  
2  
3 cancer care. *J Clin Oncol* 2009;**27**:2881-2885, DOI  
4  
5 10.1200/JCO.2008.21.1680.  
6  
7

8  
9  
10 13. US Department of Health and Human Services (2011) President's  
11 Cancer Panel: American's demographic and cultural transformations:  
12 Implications for cancer Washington DC 1-100.  
13  
14

15  
16  
17  
18 14. Department of Health and Human Services (USA) (2011), HHS Action  
19 plan to reduce racial and ethnic health disparities available via  
20  
21 [http://minorityhealth.hhs.gov/npa/files/Plans/HHS/HHS\\_Plan\\_complete.p](http://minorityhealth.hhs.gov/npa/files/Plans/HHS/HHS_Plan_complete.pdf)  
22  
23 [df](http://minorityhealth.hhs.gov/npa/files/Plans/HHS/HHS_Plan_complete.pdf), Department of Health and Human Services, Washington DC.  
24  
25  
26

27  
28  
29 15. Bhopal R. Glossary of terms relating to ethnicity and race: for reflection  
30 and debate. *J Epidemiol Community Health* 58 p. 441-445 DOI:  
31  
32 10.1136/jech.2003.013466.  
33  
34

35  
36  
37  
38 16. Office for National Statistics 2011 census ethnic groups: local authorities  
39 in England and Wales Table KS201EW  
40  
41 <http://www.ons.gov.uk/ons/search/index.html?newquery=KS201EW>.  
42  
43  
44

45  
46  
47 17. Roy R, Symonds RP, Kumar DM, Ibrahim K, Mitchell A, Fallowfield L.  
48 The use of denial in an ethnically diverse British cancer population: a  
49 cross-sectional study. *Br J Cancer* 2005;**92**:1393-1397,  
50  
51 doi:10.1038/sj.bjc.6602523  
52  
53  
54  
55  
56  
57  
58  
59  
60

- 1  
2  
3 18. Lockett T, Butow PN, King MT, Oguchi M, Heading G, Hackl NA, et al. A  
4  
5 review and recommendations for optimal outcome measures of anxiety,  
6  
7 depression and general distress in studies evaluating psychosocial  
8  
9 interventions for English-speaking adults with heterogeneous cancer  
10  
11 diagnoses. *Support Care Cancer* 2010;**18**:1241-1262, DOI  
12  
13 10.1007/s00520-010-0932-8.  
14  
15  
16  
17  
18 19. Carlson LE, Groff SL, Maciejewski O, Bultz B.D. Screening for distress in  
19  
20 lung and breast cancer outpatients: a randomized controlled trial. *J Clin*  
21  
22 *Oncol* 2010;**28**:4884-4891, DOI 0.1200/JCO.2009.27.3698.  
23  
24  
25  
26  
27 20. Akechi T, Okuyama T, Sugawara Y, Nakano T, Shima Y Uchitomi Y  
28  
29 Major depression, adjustment disorders, and post-traumatic stress  
30  
31 disorder in terminally ill cancer patients: associated and predictive  
32  
33 factors. *J Clin Oncol* 2004;**22**: 1957-1965, DOI  
34  
35 10.1200/JCO.2004.08.149.  
36  
37  
38  
39  
40 21. Stark D, Kiely M, Smith A, Velikova G, House A Selby P. Anxiety  
41  
42 Disorders in Cancer Patients: Their Nature, Associations, and Relation to  
43  
44 Quality of Life. *J Clin Oncol* 2002;**20**(14):3137-3148.  
45  
46  
47  
48  
49 22. Clarke JA, Inu, TS, Silliman RA, Bokhour BG, Krasnow SH, Robinson RA  
50  
51 et al. Patients' perceptions of quality of life after treatment for early  
52  
53 prostate cancer. *J Clin Oncol* 2003;**21**:3777-3784.  
54  
55  
56  
57  
58  
59  
60

- 1  
2  
3 23. Hoyer M, Johansson B, Nordin K, Bergkvist L, Ahlgren J, Lidin-Linqvist A  
4  
5 et al. Health-related quality of life among women with breast cancer-a  
6  
7 population-based study. *Acta Oncologica* 2011;**50**(7):1015-1026.  
8  
9  
10  
11  
12 24. Lazarus RS, Folkman S, Adams S. *Stress, appraisal and coping*,  
13  
14 Springer, New York; 1984.  
15  
16  
17  
18 25. Moos RH, Holahan CJ. Dispositional and contextual perspectives on  
19  
20 coping: toward an integrative framework. *J Clin Psychol*  
21  
22 2003;**59**(12):1387-1403.  
23  
24  
25  
26  
27 26. Hopwood P, Stephens RJ. Depression in patients with lung cancer:  
28  
29 prevalence and risk factors derived from quality-of-life data. *J Clin Oncol*  
30  
31 2000;**18**(4):893-903.  
32  
33  
34  
35  
36 27. Breen SJ, Baravelli CM, Schofield PE, Jeffor M, Yates PM, Aranda SK. Is  
37  
38 symptom burden a predictor of anxiety and depression in patients with  
39  
40 cancer about to commence chemotherapy? *MJA* 2009;**190**(7):s99-s104  
41  
42  
43  
44  
45 28. Shi Q, Smith TG, Michonski JD, Stein KD, Kaw C, Cleeland CS.  
46  
47 Symptom Burden in Cancer Survivors 1 Year After Diagnosis. *Cancer*  
48  
49 2011;**117**:2779–90, 10.1002/cncr.26146.  
50  
51  
52  
53  
54 29. Kroenke K, Johns SA, Theobald D, Wu J, Tu W. Somatic symptoms in  
55  
56 cancer patients trajectory over 12 months and impact on functional status  
57  
58  
59  
60

1  
2  
3 and disability. *Support Care Cancer* 2013;**21**:765-773, DOI  
4  
5 10.1007/s00520-012-1578-5.  
6  
7

8  
9  
10 30. Lam WWT, Bonanno GA, Mancini AD, Ho S, Chan M, Hung WK, et al.  
11 Trajectories of psychological distress among Chinese women diagnosed  
12 with breast cancer. *Psycho Oncol* 2010;**19**:1044-1051,  
13  
14 DOI10.1002/pon.1658.  
15  
16  
17

18  
19  
20  
21 31. Fu OS, Crew KD, Jacobson JS, Greenlee H, Yu G, Campbell J, et al.  
22 Ethnicity and persistent symptom burst in breast cancer survivors J  
23  
24 Cancer Surviv 2009;**3**: 241-250, DOI 10.1007/s11764-009-0100-7.  
25  
26  
27

28  
29  
30 32. Yoon J, Malin JL, Tisnado DM, Tao ML, Adams JL, Timmer MJ et al.  
31 Symptom management after breast cancer treatment: is it influenced by  
32  
33 patient characteristics? *Breast Cancer Res Treat* 2008;**108**(1):69-77.  
34  
35  
36

37  
38 33. Zigmond AS, Snaith RP. The hospital anxiety and depression scale. *Acta*  
39  
40  
41 *Psychiatr Scand* 1983;**67**:361-370.  
42  
43

44  
45 34. Mitchell AJ, Baker-Glenn EA, Park B, Granger L, Symonds P. Can the  
46  
47 Distress Thermometer be improved by additional mood domains? Part II.  
48  
49 What is the optimal combination of Emotion Thermometers? *Psycho-*  
50  
51 *oncology* 2010;**19**:134-140, DOI 10.1002/pon.1557.  
52  
53  
54  
55  
56  
57  
58  
59  
60

- 1  
2  
3 35. Roth AJ, Kornblith AB, Batel-Copel L, Peabody E, Scher HI, Holland JC.  
4  
5 Rapid screening for psychologic distress in men with prostate carcinoma:  
6  
7 a pilot study. *Cancer* 1998;**82**:1904-1908.  
8  
9  
10  
11  
12 36. Brislin RW. Back-translation for cross-cultural research. *Journal of Cross-*  
13  
14 *cultural Psychology* 1970;**1**:185-216, doi:  
15  
16 10.1177/135910457000100301.  
17  
18  
19  
20  
21 37. Kochhar PH, Rajadhyaksha SS, Suvarna VR. Translation and validation  
22  
23 of brief patient health questionnaire against DSM IV as a tool to diagnose  
24  
25 major depressive disorder in Indian patients. *J Postgrad Med*  
26  
27 2007;**53**:102-107.  
28  
29  
30  
31  
32 38. Watson M, Law M, Dossantos M, Greer S, Baruch J, Bliss JM. The Mini-  
33  
34 Mac; Further development of the mental adjustment to cancer scale. *J*  
35  
36 *Psychosoc Oncol* 1994;**12**:33-46.  
37  
38  
39  
40  
41 39. Von Elm E, Altman DG, Egger M, Pocock SJ, Gøtzsche C,  
42  
43 Vandenberghe JP. The strengthening the Reporting of Observational  
44  
45 Studies in Epidemiology (STROBE) Statement Epidemiology  
46  
47 2007;**18**(6):800-804.  
48  
49  
50  
51  
52 40. Snaith RP. The Hospital Anxiety and Depression Scale. *Health Qual Life*  
53  
54 *Outcomes* 2003;**1**:29.  
55  
56  
57  
58  
59  
60



- 1  
2  
3 41. Morse R, Kendell K, Barton S. Screening for depression in people with  
4  
5 cancer: the accuracy of the hospital anxiety and depression scale. *Clin*  
6  
7 *Eff Nurs* 2005;**9**:188-196.  
8  
9
- 10  
11 42. Bjelland I, Dahl AA, Haug TT, Neckelmann D. The validity of the Hospital  
12  
13 Anxiety and Depression Scale. An updated literature review. *J*  
14  
15 *Psychosomatic Res* 2002;**52**(2):69-77.  
16  
17  
18  
19
- 20  
21 43. Kroenke K, Spitzer RL, Williams JBW. The PHQ-9 validity of a brief  
22  
23 depression severity measure. *J Gen Intern Med* 2001;**16**:605-613.  
24  
25  
26
- 27 44. National Comprehensive Cancer Network 2011, December 10th 2010-  
28  
29 last update, *NCCN guidelines: distress management* [Homepage of  
30  
31 National Comprehensive Cancer Network], [Online].  
32  
33 [http://www.nccn.org/professionals/physician\\_gls/f\\_guidelines.asp](http://www.nccn.org/professionals/physician_gls/f_guidelines.asp) [2011,  
34  
35 9/ 25].  
36  
37  
38  
39
- 40 45. Office for National Statistics 2011, "*Neighbourhood Statistics 'Summary*  
41  
42 *Statistics', citing indices of deprivation, 2007, UK Department for*  
43  
44 *Communities and Local Government* [Homepage of Office for National  
45  
46 Statistics], [Online]. <http://www.neighbourhood.statistics.gov.uk/> [2007-  
47  
48 2011].  
49  
50  
51  
52
- 53 46. Lazarus RS. Coping theory and research: past, present and future.  
54  
55 *Psychosom Med* 1993;**55**(3):234-247.  
56  
57  
58  
59  
60

- 1  
2  
3 47. National Institute for Health and Clinical Excellence (NICE) 2011,  
4  
5 February 2010-last update, Clinical knowledge summaries (CKS) clinical  
6  
7 topics. Depression; Available via  
8  
9 [http://www.cks.nhs.uk/depression/management/scenario\\_bereavement/vi](http://www.cks.nhs.uk/depression/management/scenario_bereavement/vi)  
10  
11 [ew\\_full\\_scenario#-402794](http://www.cks.nhs.uk/depression/management/scenario_bereavement/vi) [2012, 26/6].  
12  
13  
14  
15  
16 48. Ashing-Giwa KT, Tejero JS, Kim J, Padilla GV, Hellemann G. Examining  
17  
18 predictive models of HRQOL in a population-based, multiethnic sample  
19  
20 of women with breast carcinoma. *Qual Life Res* 2007;**16**:413-428, DOI  
21  
22 10.1007/s11136-006-9138-4.  
23  
24  
25  
26  
27 49. Ell K, Sanchez K, Vourlekis B, Lee PJ, Dwight-Johnson M, Lagomasino I  
28  
29 et al. Depression, correlates of depression and receipt of depression care  
30  
31 among low-income women with breast or gynecologic cancer. *J Clin*  
32  
33 *Oncol* 2005;**23**:3052-3060, DOI 10.1200/JCO.2005.08.041  
34  
35  
36  
37  
38 50. Osborne RH, Elsworth GR, Hopper JL. Age-specific norms and  
39  
40 determinants of anxiety and depression in 731 women with breast cancer  
41  
42 recruited through a population-based cancer registry. *Eur J Cancer*  
43  
44 2003;**39**:755-762.  
45  
46  
47  
48  
49 51. Schou I, Ekeberg O, Ruland CM, Sandvik L, Karesen R. Pessimism as a  
50  
51 predictor of emotional morbidity one year following breast cancer  
52  
53 surgery. *Psychooncology* 2004;**13**:309-320. DOI 10.1002/pon.747.  
54  
55  
56  
57  
58  
59  
60

1  
2  
3 52. Brothers BM, Andersen BL. Hopelessness as a predictor of depressive  
4 symptoms for breast cancer patients coping with recurrence.

5  
6  
7 *Psychooncology* 2009;**18**:267-275, DOI 10.1002/pon.1394.  
8  
9

10  
11 53. Lo C, Zimmermann C, Rydall A, Walsh A, Jones JM, Moore MJ et al.  
12 Longitudinal Study of Depressive Symptoms in Patients with Metastatic  
13 Gastrointestinal and Lung Cancer. *J Clin Oncol* 2010;**28**:3084, DOI  
14  
15 10.1200/JCO.2009.26.9712.  
16  
17  
18  
19

20  
21 54. Grassi L, Travado L, Gil F, Sabato S, Rossi E, Tomamichel M et al.  
22 Hopelessness and related variables among cancer patients in the  
23 Southern European Psycho-Oncology Study (SEPOS). *Psychosomatics*  
24  
25 2010;**51**:201-207, DOI 10.1176/appi.psy.51.3.201.  
26  
27  
28  
29

30  
31 55. Johansson M, Ryden A, Finizia C. Mental adjustment to cancer and its  
32 relation to anxiety, depression, HRQL and survival in patients with  
33 laryngeal cancer - A longitudinal study. *BMC Cancer* 2011;**11**:283, DOI  
34  
35 10.1186/1471-2407-11-283.  
36  
37  
38  
39  
40  
41  
42  
43  
44

45 56. Chaturvedi SK, Chandra PS, Channabasavanna SM, Anantha N, Reddy  
46 BKM, Sharma S. Levels of anxiety and depression in patients receiving  
47 radiotherapy in India. *Psychooncology* 1996;**5**:343-346,  
48  
49 DOI: 10.1002/(SICI)1099-1611(199612).  
50  
51  
52  
53  
54  
55  
56  
57  
58  
59  
60

1  
2  
3 57. Kishore J, Ahmad I, Kaur R, Mohanta PK. Beliefs and perceptions about  
4  
5 cancers among patients attending radiotherapy OPD in Delhi, India.  
6  
7 *Asian Pac J Cancer Prev* 2008;**9**:155-158.  
8  
9

10  
11  
12 58. Szczepura A, Price C, Gumber A. Breast and bowel cancer screening  
13  
14 uptake patterns over 15 years for UK South Asian ethnic minority  
15  
16 populations corrected for differences in socio-demographic  
17  
18 characteristics. *BMC Public Health* 2008;**8**:346.  
19  
20

21  
22  
23 59. Miles A, Rainbow S, von Wagner C. Cancer Fatalism and Poor Self-  
24  
25 Rated Health Mediate the Association between Socioeconomic Status  
26  
27 and Uptake of Colorectal Cancer Screening in England. *Cancer*  
28  
29 *Epidemiol Biomarkers Prev* 2011;**20**:2132-2140, DOI 10.1158/1055-  
30  
31 9965.EPI-11-0453.  
32  
33

34  
35  
36 60. Symonds RP, Lord K, Mitchel AJ, Raghavan D. Recruitment of ethnic  
37  
38 minorities into clinical trials: experience from the front lines, *Br J Cancer*,  
39  
40 2012;**107**:1017-1021.  
41  
42  
43  
44  
45  
46  
47  
48  
49  
50  
51  
52  
53  
54  
55  
56  
57  
58  
59  
60

1  
2  
3  
4  
5  
6  
7 **Are depressive symptoms increased anxiety and**  
8  
9 **depression more common** among British South Asian  
10  
11 **compared to British White cancer patients?: a cross**  
12  
13 **sectional survey study.**  
14  
15  
16

17  
18 Karen Lord<sup>1</sup>, Kausher Ibrahim<sup>1</sup>, Sawan Kumar<sup>1</sup>, Alex J. Mitchell<sup>1,2</sup>, Nicky Rudd<sup>1</sup>,  
19  
20 R Paul. Symonds<sup>2</sup>  
21  
22

23  
24 <sup>1</sup>Department of Oncology, University Hospitals of Leicester NHS Trust,  
25  
26 Leicester Royal Infirmary, Leicester LE1 5WW UK  
27  
28

29  
30 <sup>2</sup>Department of Cancer Studies and Molecular Medicine, University of Leicester,  
31  
32 Osborne Building, Leicester, Leicester Royal Infirmary LE1 5WW UK  
33  
34

35  
36  
37  
38 Corresponding author –

39  
40 R Paul Symonds  
41 University of Leicester  
42 Department of Cancer Studies & Molecular Medicine  
43 Osborne Building  
44 Leicester Royal Infirmary  
45 Leicester  
46 LE1 5WW  
47 UK  
48 Email [rps8@le.ac.uk](mailto:rps8@le.ac.uk)  
49 Tel 0116 258 6294  
50 Fax 0116 258 7599  
51

52  
53 **Key words** Cancer, ethnicity, South Asian, anxiety, depression

54  
55 **Word count** [4459](#)  
56  
57

1  
2  
3  
4  
5  
6  
7  
8 **3964**  
9

## 10 **Abstract**

### 11 **Objectives**

12  
13  
14 This cross sectional ~~survey study~~ investigated whether there were ethnic  
15 differences in ~~depressive symptoms anxiety and depression~~ among British South  
16 Asian (BSA) cancer patients compared to British White (BW) patients ~~during~~  
17 ~~nine months following presentation at a UK Cancer Centre in Leicestershire.~~  
18 We ~~examined associations between depressed mood considered how~~ coping  
19 strategies ~~and the burden of symptoms were used and whether physical~~  
20 ~~symptoms affected mood.~~  
21  
22  
23  
24  
25  
26  
27

### 28 **Design**

29  
30 ~~Questionnaires were administered to 94 BSA and 185 BW recently diagnosed~~  
31 ~~cancer patients at baseline at three and nine months. — Questionnaire-based~~  
32 ~~study of newly diagnosed cancer patients interviewed soon after diagnosis and~~  
33 ~~at 3 and 9 month intervals. 53.8% of the BSA sample were born in the Indian~~  
34 ~~sSub-Ccontinent, 33.% in Africa and 12.9% in the UK. Three screening tools for~~  
35 ~~depression were used to counter concerns about ethnic bias and validity in~~  
36 ~~linguistic translation. —The Hospital Anxiety and Depression Scale (HADS),~~  
37 ~~Patient Health Questionnaire (PHQ9) (both validated in Gujarati), —Mini-MAC and~~  
38 ~~Emotion Thermometers (including the D-distress T thermometer and checklist),~~  
39 ~~Mini-MAC and were used. —Patients also completed~~ the newly developed  
40 ~~Cancer Insight and Denial questionnaire were completed, — and Cancer Beliefs/~~  
41 ~~Physician/Patient Trust questionnaire.~~  
42  
43  
44  
45  
46  
47  
48  
49  
50  
51  
52

### 53 **Setting**

54  
55  
56  
57  
58  
59  
60

Leicestershire Cancer Centre, UK.

## Participants

94 BSA and 185 BW ~~recently~~newly diagnosed cancer patients.

## Results

BSA self reported significantly higher rates of depressive symptoms ~~on~~ compared to BW patients longitudinally ~~e.g.~~ (HADS D $\geq$ 8: presentation: BSA 35.1% v BW 16.8% p=0.001; 3 months BSA 45.6% v BW 20.8% p=0.001; 9 months BSA 40.6% v BW 15.3% p=0.004). ~~A similar ethnic difference was detected in rates of anxiety until 9 months (HADS  $\geq$ 8 at presentation BSA 54.3% v BW 36.2% p=0.006; 3 months BSA 47.4% v BW 32.6%; 9 months BSA 40.6% v BW 28.2% p=0.25).~~ BSA patients used potentially maladaptive coping strategies ~~more frequently far more~~ than BW patients at baseline. ~~(In particular~~ hopelessness/helplessness p=0.005, fatalism p=0.0005, avoidance p=0.005; ~~and agreement with the CIDQ denial statement 'I do not really believe I have cancer' p=0.0005).~~ ~~were all more common in BSA patients.~~ BSA patients experienced more physical symptoms (DT checklist) which correlated with ethnic differences in depressive symptoms especially at three months. ~~An increase in cancer burden or treatment associated symptoms may have contributed to a peak in depression at 3 months.~~

## Conclusion

Health professionals need to be aware of a greater probability of depressive symptomatology and how this may present clinically, including somatic symptoms, in the first nine months after diagnosis if this ethnic disparity in mental wellbeing is to be addressed.

1  
2  
3  
4  
5  
6  
7 | High rates of anxiety and depression were present longitudinally among BSA  
8 | cancer patients when compared to BW patients.  
9  
10  
11  
12  
13  
14  
15  
16  
17  
18  
19  
20  
21  
22  
23  
24  
25  
26  
27  
28  
29  
30  
31  
32  
33  
34  
35  
36  
37  
38  
39  
40  
41  
42  
43  
44  
45  
46  
47  
48  
49  
50  
51  
52  
53  
54  
55  
56  
57  
58  
59  
60

For peer review only



## Article summary

### Article Focus

- We investigated whether there were differences in depressive symptoms anxiety and depression among British South Asian (BSA) cancer patients compared to British White (BW) over a nine9 month period.
- To limit try to avoid cultural bias we used multiple 8 questionnaires including HADS and a version of the PHQ-9 developed for India.
- We considered how coping strategies were used and whether physical symptoms affected mood.

### Key Messages

- BSA had twice the self-reported rates s of anxiety and of depressive symptoms depression than BW patients and five5 times the incidence of severe depression.
- These Differences persist for nine9 months after presentation.
- BSA patients used potentially maladaptive coping strategies far more than BW patients at baseline assessment.
- BSA patients appear to experience a heavier physical symptom burden than BW patients.

### Strengths and Limitations

This is the first comparison of how BSA and BW patients cope with cancer. We have used multiple assessment tools including a version of the PHQ-9 developed for India. We have demonstrated statistically very significant

1  
2  
3  
4  
5  
6 differences in the rates ~~s-of anxiety and of depressive symptoms-depression~~  
7  
8 between the two groups and marked differences in coping style.  
9

10 BSA clinical staff were involved in the study. In spite of this we had difficulty  
11 recruiting and retaining BSA patients ~~and retention~~, especially by by nine  
12 months ~~\_was low\_~~. Changes in mood between the three data collection points  
13  
14 are not represented. It is also likely that the rates of ~~anxiety and depressive~~  
15  
16 symptoms are under-reported since anecdotally those who were most  
17  
18 distressed often did not feel able to participate in this study. Self-reported  
19  
20 questionnaires indicate the presence of depressive symptoms but given the  
21  
22 absence of psychiatric interviews this is not diagnostic of a depressive disorder.  
23  
24  
25  
26  
27  
28  
29  
30  
31  
32  
33  
34  
35  
36  
37  
38  
39  
40  
41  
42  
43  
44  
45  
46  
47  
48  
49  
50  
51  
52  
53  
54  
55  
56  
57  
58  
59  
60

## Introduction

Depression is one of the strongest determinants of health related quality of life and it also influences medical care and participation in treatment.[1, 2] It may also be linked with other serious outcomes including mortality.[3] The point prevalence of major depression at any time in the first two years following a cancer diagnosis is 14.9% ~~by~~ via DSMIV criteria.[4] This is two to four times that observed in the general population using equivalent criteria.[5] An under researched area is the incidence of ~~psychological distress including anxiety and~~ depression in ethnic minority patients. Some research suggests that UK ethnic minorities may be more vulnerable to mental illness within the general population than the majority host population[6] leaving the largely unproven ~~impression~~ ~~that~~ that they also suffer more distress when diagnosed with cancer. However ethnic minorities may be less likely to receive high quality care.[7, 8] Inequalities in access to care, receipt of treatment and mortality are particularly striking among ethnic minorities, the elderly and those with mental ill health ~~in~~ both ~~the UK [9, 10, 11] (all party (9) and DoH cancer reform strategy 2007/ (9,10) [12,13] and the USA [12, 13, 14] (sides of the Atlantic, Goss 2009, Dept of health and human resources, Presidents panel 2011, [12,13] 9-11) where it is a governmental aspiration to r~~ ~~Removal of~~ such disparities. ~~Uk [10 and 11], USA (14) — is a priority, both of UK [12, 13] and US government [14]~~

~~The UK British South Asian (BSA) population is a large ethnic minority country, Britain (Bhopal, 2004 not in LW reference list late addition).— In England and Wales (total population 56.1 million) those classified as Indians [15] are in the~~

majority accounting for 1,412,958, Pakistan 1,124,511 and Bangladesh 447,201.[16] (~~ONS 2011 not in LW reference list~~) Most of the Indians born in Africa became refugees, being expelled by Idi Amin and others in East African states

The city of Leicester has one of the highest concentrations of this population (total population: 329,836: Indian 93,000, Pakistani, 8,000, Bangladeshi, 3,600) which contrast with the surrounding county (total population: 650,489: Indian 54,000, Pakistani, 2,100, Bangladeshi, 2,300).[16] ONS 2011 same as above same as previous ref see comment) accounting for approximately 33%, predominantly of Gujarati decent originally from western India. We define 'British South Asian (BSA)' as a person whose ancestry is in the Indian subcontinent, and who identifies with, or is identified with, their host country, Britain. A previous pilot study showed a significantly higher incidence in symptoms of depression amongst BSA patients in Leicester and local counties compared to British White (BW) patients via HADS D  $\geq 10$  (BSA 20.7%; BW 10.4% p=0.001).[17] Depression Anxiety and depression wasere associated with certain coping styles, particularly the use of denial in both BSA and BW patients but was employed more frequently by BSA patients.

The findings of our pilot study [17] Roy, 2005] 16 were consistent with the few publications reporting the incidence of depression or distress in ethnic minority cancer patients. The largest is a meta-analysis of 21 papers which found that US Hispanic patients were significantly more distressed (p=0.0001) and depressed (p=0.04) than the majority population.[168]

1  
2  
3  
4  
5  
6  
7  
8 Similar findings were reported from Canada with more distress amongst ethnic  
9 minorities (E and SE Asia, South Asian, [First NationAboriginals](#)) compared to  
10 the majority population (European, Canadian, British p=0.0001). Greater  
11  
12 distress was also found among those with lower income  
13  
14  
15  
16 (p=0.001).[\[1879\]Lockett](#)

17  
18  
19  
20 ~~This study addressed~~ ~~Here we aimed to address~~ how the UK's largest ethnic  
21 minority population (BSA) cope with cancer, in comparison to the host  
22 population, by analysing data from a sample of those attending the  
23  
24 Leicestershire Cancer Centre.  
25  
26  
27

28  
29  
30 Feeling distressed or low in mood are initial emotional responses to a diagnosis  
31 of cancer, and is part of normal adjustment, if of short duration. If, however  
32 distress persists it can have a harmful effect on the mental wellbeing of the  
33 individual risking depressive symptoms [17, 20]([Akechi et al. 2001\(19\)](#), [Roy et](#)  
34 [al. 2005\(16\)](#), )and reduction in compromise of their quality of life.[21, 22, 23]  
35 ([Stark et al. 2002,\(20\)](#) [Clarke et al. 2003\(21\)](#), [Hoyer et al. 2011\(22\)](#)).  
36  
37  
38  
39  
40  
41  
42

43 The Transactional Model of Stress and Coping requires an assessment of  
44 personality traits within the context of their environment.[24] ([Lazarus, Folkman](#)  
45 & [Adams 1984](#))23. For cancer patients this environment- includes their beliefs  
46  
47 about cancer, their level of social support, proficiency in host languages, level of  
48 literacy, degree of disability, co-morbidities, spiritual beliefs, cultural background  
49 and economic circumstances.[25] ([Moes, Holahan 2003](#))24.  
50  
51  
52  
53  
54

1  
2  
3  
4  
5  
6  
7  
8 The symptom burden on cancer patients can influence coping with a close  
9 interrelationship with psychological wellbeing. –Fatigue and disabilities  
10 independently predicted depression among lung cancer patients commencing  
11 treatment [26](Hopwood, 2000)25 and has been observed in pre-  
12 chemotherapy patients with curative cancer.[27](Breen, 2009)26. A high  
13 symptom burden can persist over time. 1 in 4 patients (n=4903) had a high  
14 symptom burden 1 year post diagnosis with depression, fatigue and pain having  
15 the greatest impact on their quality of life.[28](Shi, 2011)27. Similarly a high  
16 symptom burden at 12 months was reported among patients referred for control  
17 of pain and depression (n=405).[29]Kroenke, 2013)28. Among Chinese breast  
18 cancer patients (n=285) less distress from physical symptoms immediately after  
19 surgery-early post surgery predicted psychological resilience. The study  
20 suggested that ineffective symptom control during treatment increased a  
21 women's risk of persistent psychological distress longitudinally-. The value of  
22 pre-operative interventions was highlighted.[30]Lam,2009)29.

23  
24  
25  
26  
27  
28  
29  
30  
31  
32  
33  
34  
35  
36  
37  
38  
39 Of particular concern are reports of higher symptom burden in ethnic minorities  
40 such as among Hispanic women post-chemotherapy for breast cancer [31](Fu,  
41 2009)30 and greater 'unmet need' for symptom control was implicated among  
42 Black and Spanish speaking Hispanic women with breast cancer than White  
43 women.[32](Yoon J, 2008)31

44  
45  
46  
47  
48  
49  
50  
51 We report the longitudinal incidence of depressive symptoms among a sample  
52 of BSA and BW patients. Coping styles and the burden of patient problems  
53  
54

1  
2  
3  
4  
5  
6 were examined to determine if they were implicated in depressive symptoms.

7  
8 problems

9  
10 **Hypotheses**

11 On the basis of our literature review and pilot studies we hypothesized that  
12 more BSA cancer patients would self report depressive symptoms than BW  
13 patients over time. We further hypothesized that both a greater use of  
14 potentially maladaptive coping strategies and a heavier symptom burden, would  
15 reflect higher rates of depressive symptoms.

16  
17  
18  
19  
20  
21  
22  
23  
24 ~~We report the longitudinal incidence of anxiety and depression in both groups.~~  
25 ~~Initial assessment took place as soon as possible after diagnosis and 3 and 9~~  
26 ~~months later. Coping styles were also examined to determine if patterns of~~  
27 ~~maladaptive coping changed with time. Greater understanding of how patients~~  
28 ~~from ethnic minorities cope with cancer is a pre-requisite to eliminating~~  
29 ~~inequalities.~~

30  
31  
32  
33  
34  
35  
36  
37 **Methods**

38  
39  
40  
41 **Hypotheses**

42 ~~On the basis of our literature review and pilot studies we hypothesized that~~  
43 ~~longitudinally more BSA cancer patients would self report symptoms of anxiety~~  
44 ~~and depression than BW patients. We further hypothesized that a greater use~~  
45 ~~of maladaptive coping strategies would reflect higher rates of anxiety and~~  
46 ~~depression.~~

## Study procedures

279 patients, who were aware they had cancer, were recruited at the Leicestershire Cancer Centre between September 2007 and January 2010 at their first or second appointment. Patients were recruited by either an English speaking clinical nurse specialist or one of two radiographers, who between them spoke English, Gujarati and Hindi and Urdu. None were involved in the clinical care of the patients and all received training in 'Good Clinical Practice' and in the principles of informed consent. The Leicestershire, Northamptonshire and Rutland Ethics Committee approved the study. Eligible patients were aged 18-85 with a confirmed diagnosis of cancer with evidence of being informed of the diagnosis. They were identified by the nurse specialist via the cancer registry with ethnicity confirmed by their surname and by hospital records.

Prior to their attendance eligible patients were sent an introductory-letter outlining the study and inviting them to participate. All correspondence and questionnaires were available in English, Gujarati and Hindi. Consent was sought requesting patients complete three sets of questionnaires in writing, the first immediately as soon as possible, then at three months and nine month intervals. (Table 1)

~~Patients were recruited by either an English speaking clinical nurse specialist or one of two radiographers, who between them spoke English, Gujarati and Hindi.~~

## Questionnaires

Patients completed the Hospital Anxiety and Depression Scale (HADS) Zigmond 1983 [3318] and The Emotion Thermometers [3419] (Mitchell 2010) which



1  
2  
3  
4  
5  
6 includesincorporates the Distress Thermometer [235]0 and depression  
7  
8 thermometeralongside thermometers for anxiety (Anx-T) and depression (Dep  
9 T). A problem checklist, included on the thermometer, identified the patient's  
10 symptom burden.(Roth, 1998-35) All are validated but were not initially  
11 available in Gujarati or Hindi. Therefore A commercial company we undertook  
12 an iterative back-translation process as described by Brislin.[36],1970. a  
13 translation via the back-to-back method.[3621] Brislin 1970. A version of the  
14 Patient Health Questionnaire (PHQ-9), which was already validated into Gujarati  
15 and Hindi having been adapted for use in India, was the third questionnaire  
16 used.[237]2 Several tools were used to address the concern that some  
17 weretools are ethnically biased.

18  
19  
20  
21  
22  
23  
24  
25  
26  
27  
28  
29  
30 An adaptive coping strategy (fighting spirit) and potentially maladaptive  
31 strategies (hopelessness/helplessness, fatalism, anxiety preoccupation and  
32 cognitive avoidance) were Coping strategies were assessed via the Mini-MAC  
33 scale.[3823].Watson 1994 and the locally developed Cancer Insight and  
34 Denial questionnaire (CIDQ). The CIDQ included question 38 from the original  
35 MAC questionnaire to assesselicit the use of denial. The Brief Illness  
36 Perception Questionnaire [24] and the Physician/Patient Trust/ Cancer Beliefs  
37 Questionnaire [25] considered how patients interpreted cancer. The vast  
38 majority of participants chose to complete the first questionnaires at home,  
39 returning them by post. Subsequent questionnaires were posted to participants.

40  
41  
42  
43  
44  
45  
46  
47  
48  
49 Personal statements illustrating how patients coped were generated by two  
50 qualitative questions, "how would you describe your current illness", and "what  
51 does having cancer mean to you?"  
52  
53  
54

## Statistical analysis

Reference was made to the 'Strobe' statement for observational studies.<sup>[39]</sup> (Von Elm, 2007). Depressive symptoms were assessed by We used the following scales and cut off thresholds. HADS A and HADS D, 7v8, ET Thermometers 3v4 and PHQ-9 9v10. In addition cut off scores of HADS  $\geq 11$  and PHQ-9  $\geq 15$  and  $\geq 20$  were used to indicate high severity for depressive symptoms.

The revised classification of the original HADS identified the severity of depressive symptoms (normal 0-7, mild 8-10, moderate 11-14 and severe 15-21).<sup>[40]</sup> Zigmund, Snaith, 1992, Snaith 2003]. - A threshold of  $\geq 11$  identified patients with moderate symptoms, however following the recommendation to have a lower threshold for cancer patients than in general practice,  $\geq 8$  was selected for HADS D.<sup>[41]</sup> Morse et al 2005]. This is supported by a review of 747 papers using HADS where the best balance between sensitivity and specificity was achieved most often when using the cut-off  $\geq 8$ , (Cronbach's alpha coefficient, 0.80).<sup>[42]</sup> Bjelland et al, 2003]. Threshold scores of  $\geq 10$ ,  $\geq 15$ ,  $\geq 20$  for PHQ-9 were in accordance with the original recommended scores.<sup>[43]</sup> Kroenke, Spitzer & Williams, 2001]. - The current recommended threshold for the DT is  $\geq 4$  and this is retained in the ET <sup>[44]</sup> NCCN (National Comprehensive Cancer Network) 2011] and this analysis. A prior power analysis based on our pilot studies determined 86 participants were required for each ethnic group.

1  
2  
3  
4  
5  
6  
7  
8 –Graphs denote 95% confidence intervals. Summary scores for selected  
9 coping strategies were from the Mini-MAC and the denial indicators in the CIDQ  
10 questionnaire. Reference was made to individual indicators. Longitudinal data  
11 at baselinepresentation and at three3 and nine9 months is reported.  
12  
13  
14  
15  
16

17  
18 Computation of frequencies, percentages and arithmetic median was conducted  
19 to identify patterns in the data. Mann Whitney tests for continuous variables  
20 detected differences between the ethnic groups and the direction of these  
21 relationships. Spearman's Rank Order Tests (rho) explored correlations  
22 between depressive symptoms (HADS D as a continuous variable) and  
23 deprivation. [45](Office for National Statistics, 2011). We report analysis by  
24 age, gender, deprivation, tumour site, place of birth and ethnicity.  
25  
26  
27  
28  
29  
30  
31

32  
33 Chi<sup>2</sup> described the relationship between categorical variables. The extent to  
34 which patients used each coping strategy and how its use changed  
35 longitudinally is described. Associations between each strategy and anxiety  
36 and depressive symptoms on is-are reported. Qualitative data was recorded  
37 verbatim. When in Gujarati it was translated to English. Analysis was  
38 performed via SPSS v 18.  
39  
40  
41  
42  
43  
44  
45

## 46 47 48 **Results**

49 94 BSA patients were recruited-. The BSA sample largely represents cancer  
50 patients within the Leicester Indian population and although of interest to other  
51 BSA cancer populations, these findings may not be representative. – 53.8%  
52  
53  
54  
55  
56

1  
2  
3  
4  
5  
6 were born in the Indian sSub-Ccontinent, 33% in Africa of Indian descent and  
7  
8 12.9% in the UK. with approximately 33% born in Africa. 4Hindus accounted for  
9  
10 53.2%, Muslims 25.5% and 17% Sikh. 185 BW patients were recruited.

11 Several cancer sites are represented. The largest cohort was 114 breast  
12  
13 cancer patients. The educational attainment, religion and place of birth ~~record~~  
14  
15 were self-reported by participants. The demographic characteristics of this  
16  
17 sample showed significant differences between ethnic groups in terms of their  
18  
19 socio-economic status and educational attainment. These details and the  
20  
21 patient's sex, age, cancer site and treatment intent are listed in Table 24.  
22  
23  
24  
25  
26  
27  
28  
29  
30  
31  
32  
33  
34  
35  
36  
37  
38  
39  
40  
41  
42  
43  
44  
45  
46  
47  
48  
49  
50  
51  
52  
53  
54  
55  
56  
57  
58  
59  
60

### Demographics and depressive symptoms

Age was not associated with depression among BSA patients (rho: HADS D, (p=0.62). Older BW patients were less likely to be depressed (rho: HADS D (p=0.03). There was no statistical difference based on gender with females having a higher mean depression score than males at baseline (HADS D; females 4 (range 0-18) IQR 1,7) (males 3 (range 0-20) IQR 1,6) p=0.46.

67.4% patients received radical treatment with the aim of cure or long term control of disease and 32.6% received palliative treatment given with no expectation of cure. Unexpectedly there was no evidence that receiving palliative as opposed to radical (curative intent) treatment influenced a difference in depressive symptoms (HADS D $\geq$ 8 presentation p=0.088, 3 months p=0.588 9 months p=1.0). Those with lung cancer, who generally have a poor prognosis, had the highest median depression score via HADS D of 5 (IQR 3,7, scale 0-21). The lowest score was attributed to people with prostate cancer (Md 1 (IQR 0,5) (Supp. Table 1).

Data on educational attainment was recoded into two groups with those patients reaching educational level of 15/16 removed. This represented groups at either end of educational attainment. Those educated at the highest level had notably less depressive symptoms than those with either no formal education or only until up to the age of 11 (HADS D  $\geq$ 8, Lowest Ed. 14/30 (46.7%); Highest Ed. 18/97 (18.6%) p=0.004. However these results should be treated with caution given the educational systems of India and the UK are different. For example "Some patients had listing no formal education but spoke fluently up to five

1  
2  
3  
4  
5  
6 languages.- Individual results in patients who reported little formal education  
7 were consistent across assessment tools suggesting adequate  
8 comprehension.” (p18)  
9

10  
11  
12  
13  
14 There was no significant difference in depressive symptoms between those  
15 BSA patients originating from Africa compared to the Indian Sub continent at  
16 baseline (-MW: Africa 31/80 Md 4 (2,9) Indian Sub Continent Md 5.5 (2,11) Z=-  
17 1.184 p=0.23). Neither was there a significant difference in the experience of  
18 symptoms frequently associated with depression such as (pain (p=0.23), sleep  
19 disturbances (p=0.91) and fatigue (p=0.52).  
20  
21

22  
23  
24  
25  
26  
27  
28 Since socio-economic deprivation is closely associated with being a member of  
29 an ethnic minority we considered the extent to which deprivation influenced the  
30 strength of the relationship between ethnicity and depressive symptoms.  
31

32  
33  
34 Although there was a strong association between ethnicity and deprivation (MW  
35 r=0.503, p=0.0005)- deprivation The latter had minimal influence on the strength  
36 of the relationship between ethnicity and depression when comparing Pearson  
37 product-moment correlations (PCC) with partial correlation calculations (Table  
38 3).  
39  
40  
41  
42

#### 43 **Anxiety and Depressive symptomson at baseline-early after diagnosis**

44  
45  
46  
47 All three assessment tools showed approximately double the incidence of  
48 depression in BSA patients compared to BW patients (Fig 1a and suppl. Table  
49 2). Severe depression was also more common in the BSA groups as  
50 demonstrated using a higher HADS score  $\geq 11$  (BSA 23/94 (24.5%) BW 11/185  
51  
52  
53  
54  
55

(5.9%)  $p=0.001$ ). A similar trend was seen using a higher PHQ-9 threshold ~~off score~~ ( $\geq 15$ ) BSA 13/85 (15%) BW 10/173 (5%)  $p=0.04$ . ~~Again significantly higher levels of anxiety were seen in BSA patients (HADS-A  $\geq 8$  BSA 54.3% v BW 36.2%  $p=0.006$ ) especially severe anxiety (HADS-A  $\geq 11$  BSA 34% v BW 18.9%  $p=0.008$ ). The ethnic difference was reproduced via the AnxT $\geq 4$  albeit inclusive of more patients (BSA 67.5% v BW 52.2%  $p=0.02$ ) (Fig 1b).~~

### Longitudinal trends in depressive symptoms ~~anxiety and depression~~

All tools indicated how more vulnerable BSA patients were in contrast to BW patients. HADS D  $\geq 8$  suggested significantly higher rates of depressive symptoms among BSA patients longitudinally than BW patients (Fig 1**be**). All three assessment tools indicated a slight decrease in depressive symptoms among BSA patients at three months. Depression rates had not fallen lower than those at presentation by nine months although the ethnic difference remained (Fig 1c & 1d).

~~Rates of anxiety appeared to subside for both ethnic groups over time although more BSA patients remained anxious than BW patients at 3 months (HADS A  $\geq 8$   $p=0.04$ ) (Fig 1e). The difference had gone by 9 months ( $p=0.254$ ). The Anxiety Thermometer  $\geq 4$  echoed this trend (3 months ( $p=0.13$ ), 9 months ( $p=0.17$ )) (Fig 1f).~~

### **Influence of deprivation**

~~Since socio-economic deprivation is closely associated with being a member of an ethnic minority we considered the extent to which deprivation influenced the strength of the relationship between ethnicity and anxiety and depression.~~

1  
2  
3  
4  
5  
6  
7  
8 Although there was a strong association between ethnicity and deprivation (MW  
9  $r=0.503$ ,  $p=0.0005$ ), the latter had minimal influence on the strength of the  
10 relationship between ethnicity and depression when comparing Pearson  
11 product moment correlations (PCC) with partial correlation calculations. (HADS  
12 D:  $-.274$ ;  $p=.0005$ ) partial correlation ( $-.235$ ,  $p=0.001$ ) and via PHQ-9 (PCC  
13  $-.257$ ,  $p=0.0005$ ) partial correlation ( $-.208$ ,  $p=0.001$ ). There was a weak  
14 association between ethnicity and anxiety (HADS A  $-.147$   $p=0.014$ ). Although  
15 deprivation did influence the strength of that relationship to the extent that it  
16 became insignificant ( $-.093$   $p=0.123$ ), the difference between the correlations  
17 was minimal, results supported by findings via Anx-T (PCC  $-.087$   $p=0.158$ )  
18 partial correlation ( $-.083$ ,  $p=0.179$ ).  
19  
20  
21  
22  
23  
24  
25  
26  
27  
28  
29  
30  
31

### 32 Coping Strategies

33 BSA patients used ~~maladaptive~~ coping strategies ~~differently more than~~ BW  
34 patients particularly early after diagnosis when ~~greater use of potentially~~  
35 ~~maladaptive strategies were~~ ~~they were~~ associated with higher rates of ~~anxiety~~  
36 ~~depressive symptoms and depression~~ (~~Suppl tables 3, 4 & 5~~).  
37  
38  
39  
40  
41  
42

### 43 Hopelessness/ helplessness (Mini MAC)

44 *"its an awful thing to happen....feeling hopeless"*  
45  
46  
47

48 BSA patient [No.16](#) soon after diagnosis [No.16](#)  
49  
50  
51  
52  
53  
54  
55  
56  
57  
58  
59  
60



1  
2  
3  
4  
5  
6 Although initially the majority of patients did not express helplessness nor  
7  
8 hopelessness, BSA patients were far more likely to do so ( $p=0.0005$ ). For  
9  
10 example, more BSA patients than BW patients agreed with the statement 'I feel  
11  
12 completely at a loss about what to do' (BSA 31 (33%); BW 23(12.4%)  
13  
14  $p=0.0005$ ). Across the study period BSA patients had higher  
15  
16 helplessness/hopelessness scores than BW patients although ~~its~~-use  
17  
18 decreased over time for both groups (Fig 2a). Helplessness/hopelessness is  
19  
20 sometimes considered to be a substitute for depression so it was not surprising  
21  
22 that over time ~~as one sample~~ more patients (BSA and BW combined) ~~who~~-felt  
23  
24 helplessness/hopelessness ~~and also~~ -acknowledged depressive symptoms  
25  
26 (MW: PHQ-9  $\geq 10$  v 11/HADS D  $\geq 7$  v 8  $p=0.0005$ ). ~~Helplessness/hopelessness~~  
27  
28 ~~was also associated with a higher incidence of anxiety (MW: HADS A 7 v 8,~~  
29  
30  ~~$p=0.0005$ ).~~  
31  
32  
33  
34  
35

### 36 Anxiety preoccupation

37  
38 *"Cancer has totally changed my life. I am worried, anxious about my treatment*  
39  
40 *and what lies ahead as this is the second occasion I am going through this"*  
41  
42 BSA No.103.  
43  
44

45 There was a negligible ethnic difference in the use of anxiety preoccupation.

46  
47 Over time this strategy was used less (Fig 2b). ~~Individual indicators suggested~~  
48  
49 ~~that BW patients appeared far more apprehensive than BSA patients (BSA~~  
50  
51 ~~47/93 (50.5%); BW 135/185 (73%)  $p=0.0005$ ), more upset about having cancer~~  
52  
53 ~~(BSA 58/94 (61.7%); BW 149/185 (80.5%)  $p=0.001$ ) and more likely to describe~~  
54  
55  
56  
57  
58  
59  
60

1  
2  
3  
4  
5  
6 themselves as a 'little frightened' (BSA 65/94 (69.1%), BW 149/185 (80.5%)  
7  
8  $p=0.048$ . It appears paradoxical therefore that BSA patients self reported  
9  
10 greater anxiety via a single indicator (BSA 46/94 (48.9%) BW 60/185 (32.4%)  
11  
12  $\text{Chi}^2 p=0.011$ ). Longitudinally there remained little ethnic difference in patients  
13  
14 who were preoccupied with anxiety (3 months  $p=0.751$ , 9 months  $p=0.926$ ).

15  
16 It was

17  
18 Anxiety preoccupation was strongly associated with depression (HADS D and  
19  
20 PHQ-9,  $p=0.0005$ ). Given the overlap of phenomena between anxiety  
21  
22 preoccupation (the strategy) and anxiety (the outcome) there was predictably a  
23  
24 strong association between them (HADS A  $r=0.63$ ,  $p=0.0005$ ). These patients  
25  
26 were also more likely to report at greater risk of becoming depressive  
27  
28 symptomsed longitudinally (PHQ-9: presentation  $p=0.0005$ , 3 months  $p=0.0005$ ,  
29  
30 9 months  $p=0.0005$ ).

### 31 32 33 **Cognitive avoidance**

34  
35  
36 Cancer is "...something that I put to the back of my mind and don't let it  
37  
38 interfere with my day to day life"- BW No.118

39  
40  
41 Initially BSA patients used cognitive avoidance to cope more than BW patients  
42  
43 (MW:  $p=0.0005$ ) (Fig 2c). For example, 'I deliberately push all thoughts of  
44  
45 cancer out of my mind' (BSA 61/93 (65.6%); BW 63/185 (34.4%),  $p=0.0005$ ).

46  
47 Over time this ethnic difference continued but was only statistically  
48  
49 significant/notable at baseline/presentation as illustrated by a comparison of  
50  
51 median scores (Fig 2c). At baseline/Soon after diagnosis, as one sample, those  
52  
53 who used cognitive avoidance were more likely to have symptoms of  
54  
55

depression (MW: PHQ-9  $p=0.007$ ; HADS D  $\geq 8$   $p=0.001$ ; Dep.T  $\geq 4$   $p=0.002$ ),  
~~and anxiety (HADS A  $\geq 8$   $p=0.0005$ / Anx.T.  $\geq 4$   $p=0.002$ ).~~ Over time avoidant  
 patients ~~did not~~ continued to be ~~anxious (HADS A 3 months  $p=0.016$ , 9 months  
 $p=0.026$ ) but not~~ depressed (HADS D; 3 months  $p=0.2$ ; 9 months  $p=0.14$ ).

### Fighting Spirit

(I see cancer) *"as a challenge...a temporary state....a hurdle to get over"*

BW patient No.172

*"It means I have a fight on my hands but I'm determined to get better"*

BW No.354

A large number of patients in both ethnic groups approached their illness with  
 an 'adaptive' coping strategy of 'fighting spirit' (Fig 2d). For example, 'I am  
 determined to beat this disease' ((BSA 85/93 (91.4%) ~~(n=93)~~; BW 170/185  
 (91.9%) ~~(n=185)~~  $p=1.0$ ). There was little ethnic difference in the extent to which  
 patients used this coping strategy (MW presentation  $p=0.47$ , 3 months  $p=0.57$ ,  
 9 months  $p=0.2$ ). ~~Furthermore there was no consistent association with anxiety  
 (HADS A  $p=0.8$ , 3 months  $p=0.4$ , 9 months  $p=0.6$ ) or depression as one sample  
 for example (PHQ-9 presentation  $p=0.3$ , 3 months  $p=0.2$ , 9 months  $p=0.7$ ).~~

### Fatalism

*"It's horrible. Why me? My mum died from cancer. My sisters have cancer.*

*Why is this happening? I wish I'd never woken up after my operation"*

BSA No.125

1  
2  
3  
4  
5  
6 ~~At presentation~~ More BSA patients were fatalistic when diagnosed with cancer  
7  
8 than BW patients at baseline assessment (MW:  $p=0.0005$ ). ~~H~~ However this was  
9  
10 largely based on one of five Mini MAC indicators, 'I've put myself in the hands  
11  
12 of God' (BSA 71/94 (75.5%); BW 60/185(32.4%)  $p=0.0005$ ). There was a  
13  
14 gradual decrease in fatalism in both ethnic groups by nine months although it  
15  
16 persisted among BSA patients (Fig 2e). Those who were fatalistic were more  
17  
18 likely to experience depressive symptoms ~~(via two tools (MW PHQ-9  $p=0.003$ ;~~  
19  
20 (MW: HADS D $\geq$ 8  $p=0.024$ ; PHQ-9,  $p=0.003$ )) but not by the Dep T.  $\geq$ 4  
21  
22 ( $p=0.101$ ). ~~Anxiety too was associated with fatalism (HADS A MW:  $p=0.011$ ).~~  
23  
24 ~~Again AnxT did not support these findings ( $p=0.164$ ).~~

### Insight and Denial (CIDQ)

31  
32 *"I'm not ill"*

33  
34 Written at the top of an uncompleted questionnaire BIPQ by a patient having  
35  
36 chemotherapy for breast cancer following surgery. BW No.127 at presentation

37  
38  
39 *"...part of me still feels there is nothing wrong with me and this is happening to*  
40  
41 *someone else. This is presumably my way of handling it all."* BW No.311 at

42  
43 nine months

44  
45  
46  
47 Of those who used denial, potentially a maladaptive coping strategy  
48  
49 [46](Lazarus, 1993) as a means of coping, BSA patients were over-  
50  
51 represented, most notably at baseline assessment ~~soon after diagnosis~~  
52  
53 ( $p=0.001$ ). The ethnic gap remained longitudinally (Fig 2f). Of the three tools

1  
2  
3  
4  
5  
6 assessing depression only PHQ-9 indicated an association between denial and  
7  
8 depression albeit weakly (MW:  $p=0.039$ ). ~~There was a similar difficulty in~~  
9  
10 ~~generating firm conclusions about the relationship between denial and anxiety.~~  
11  
12 ~~The median scores using HADS A and AnxT suggested a tendency towards~~  
13  
14 ~~being more anxious when using denial.~~

15  
16  
17  
18 To facilitate comparisons with Roy's 2005 [175] study, analysis of the single  
19  
20 indicator 'I don't really believe I have cancer' originating from the MAC  
21  
22 questionnaire was repeated. At ~~baseline presentation~~ 229/278 patients (82%)  
23  
24 accepted the reality of their diagnosis by disagreeing with the statement. Of the  
25  
26 27 patients who didn't believe that they had cancer, more were BSA (BSA 19/93  
27  
28 (20.2%); BW 8/185 (4.3%),  $p=0.0001$ ). Of interest is that 23 patients agreed  
29  
30 with this statement 'sometimes' (BSA 12 (52.2%); BW 11 (47.8%)). There was  
31  
32 a strong trend towards BSA patients who denied their diagnosis to be more  
33  
34 ~~anxious and~~ depressed ~~at baseline~~ but sample numbers were too low to  
35  
36 ~~warrant analysis assess statistically~~ at ~~nine~~9 months (Fig 2g).

37  
38  
39 We considered whether causes of distress ~~listed in~~ via the distress thermometer  
40  
41 checklist explained ethnic differences in ~~anxiety and~~ depressive ~~symptoms~~.  
42  
43 Cancer treatments offered to both groups were similar so did not influence  
44  
45 findings. Critically BSA patients experienced more distress from physical  
46  
47 symptoms of illness and treatment than BW patients. ~~There were 17 physical~~  
48  
49 ~~symptoms listed. In 13 categories BSA had statistically significant increased~~  
50  
51 ~~symptoms compared to In 13 out of 17 symptoms BSA patients returned higher~~  
52  
53 ~~scores than~~ BW patients ~~at presentation~~. For example, pain (BSA 51/83 (58%)).  
54  
55

1  
2  
3  
4  
5  
6 BW 59/180 (32.8%) p=0.0001), mouth sores (BSA 21/88 (24.1%)<sub>1</sub>, BW 12/179  
7 (6.7%) p=0.0001) and fevers (BSA 18/87 (20.7%)<sub>2</sub>; BW 5/177(2.8%) p=0.0001).

8  
9  
10 At ~~3~~three months significantly higher percentages of BSA patients reported  
11 problems with pain, mouth sores, nausea, skin, washing and dressing and  
12 getting around as causes for distress which were not reflected in BW patients.  
13  
14

15  
16 By ~~nine~~9 months differences had narrowed with the exception of pain (BSA  
17 19/31 (61.3%) v BW 41/121 (33.9%) p=0.009) (Table 4).  
18  
19

## 20 21 22 Discussion

23  
24 With the exception of our pilot study [17] (—) we are not aware of another  
25 comparison of how BSA and BW patients cope with cancer. To our knowledge  
26 a comparison of how BSA and BW patients cope with cancer has not previously  
27 been reported. It should be of major concern to health care policy makers in the  
28 UK that this study provides evidence that there is a higher prevalence of anxiety  
29 and depressive symptoms among BSA patients soon after the cancer  
30 diagnosis than BW patients. The percentages vary depending on the  
31 assessment tool used but all showed the same trend. BSA rates for depression  
32 were twice that of BW patients using two tools. For example on the HADS-D  $\geq 8$   
33 scale 35.1% of BSA compared to 16.8% of BW patients (p=0.001) had at least  
34 moderate depressive symptoms measured on the HADS D scale ( $\geq 8$ ). on  
35 (score  $\geq 8$ ). This was confirmed on a version of the PHQ-9  $\geq 10$  developed for  
36 India (35.3% BSA v 18.3% BW p=0.05). This is a critical finding since this is  
37 almost 6 times higher than reported within the UK general population using the  
38 same assessment tool (6%).<sup>[2647]</sup> Depression rates for BW patients (PHQ-9  
39 18.3%, (-HADS D  $\geq 8$ , 16.8%; PHQ-9 18.3%)) were similar to those reported in a  
40  
41  
42  
43  
44  
45  
46  
47  
48  
49  
50  
51  
52  
53  
54  
55  
56  
57  
58  
59  
60

1  
2  
3  
4  
5  
6 recent meta-analysis of cancer patients (16.3%), being approximately 2.5 times  
7  
8 higher than in the general population.[4] What is ~~disturbing-most striking~~ is the  
9  
10 incidence of ~~more severe~~ severe depression in BSA patients which is reflected in  
11  
12 their HAD-D score  $\geq 11$  (BSA 24.5% v BW 5.9%  $p=0.0001$ ). ~~This was confirmed~~  
13  
14 ~~on a version of the PHQ-9  $\geq 10$  developed for India (35.3% BSA v 18.3% BW~~  
15  
16  ~~$p=0.05$ ). However differences were not just confined to depression. Significantly~~  
17  
18 ~~higher levels of anxiety were seen in BSA patients (HADS-A  $\geq 8$  BSA 54.3% v~~  
19  
20 ~~36.2% BW  $p=0.006$ ) including severe anxiety (HADS-A  $\geq 11$  BSA 34% v 18.9%~~  
21  
22  ~~$p=0.008$ ). Patients also exhibited more anxiety with rates far higher than in the~~  
23  
24 ~~general population (DSMIV-5 15%).[27]~~

25  
26  
27 These findings supported trends in other studies, notably ~~our~~ pilot study.  
28  
29 Using the ~~threshold cut-off~~ (HADS  $\geq 10$ ), Roy [175] reported BSA 20.7% v BW  
30  
31 10.4% ( $p=0.001$ ) had ~~moderate~~ severe depressive symptoms. ~~With a slightly~~  
32  
33 ~~higher cut-off ( $\geq 11$ ) our study findings at presentation again pointed to a~~  
34  
35 ~~significant difference (BSA 34% v BW 18.9%  $p=0.008$ ).[15]~~ These concur with  
36  
37 other reports which suggest that ethnic minority cancer patients experience  
38  
39 more psychological distress than patients from host populations.[16, 17, 428,  
40  
41 429] ~~However the BSA population is heterogeneous heterogeneous. It would~~  
42  
43 ~~be grossly simplistic to assume all BSA that sub-populations within this 'label'~~  
44  
45 ~~respond psychologically in the same way given the breadth and diversity of~~  
46  
47 ~~their religious and cultural influences. Ethnic minorities are however not~~  
48  
49 ~~heterogeneous. There are for example variations in baseline common mental~~  
50  
51 ~~disorders in the UK among some BSA groups.[6]~~ However ~~Indian Hindus~~  
52  
53  
54  
55  
56  
57  
58  
59  
60

1  
2  
3  
4  
5  
6 ~~comprised the majority of over 50% of~~ our BSA sample and our findings may be  
7 of particular relevance to this sub-group.  
8 ~~—were Indian Hindus.~~

14 What is very interesting is that the HADS-D, PHQ-9 and DepT showed higher  
15 levels of depressive ~~symptoms~~ in both ethnic groups at ~~3~~ three months after  
16 ~~baseline presentation~~, this being steeper among BSA patients. Although  
17 ~~symptoms decreased rates fell back~~, BSA consistently reported higher rates of  
18 depression than BW patients longitudinally. ~~The decline in the prevalence of~~  
19 ~~anxiety was consistent in both groups over time but the ethnic difference~~  
20 ~~persisted.~~—These findings confirmed our first hypothesis.

29 A counter intuitive finding in this study is the similarity of ~~anxiety and depressive~~  
30 ~~symptoms~~ in patients being treated with curative intent (radical) and palliative  
31 patients. Although there ~~were~~ a fewer ~~less~~ questionnaires returned at poorer  
32 ~~rate of return of questionnaires at three~~ 3 and ~~nine~~ 9 months, the ratio of radical  
33 and palliative patients remained the same (HADS D  $\geq 7$  ~~v8~~ baseline presentation  
34  $p=0.08$ , 3 months  $p=0.58$ , 9 months  $p=1.0$ ). In fact this finding is consistent with  
35 a recent meta-analysis.[4]

45 ~~Previously we had considered whether there were differences in knowledge~~  
46 ~~about cancer and levels of trust in doctors between BSA and BW patients. High~~  
47 ~~levels of trust were found in both groups and differences in knowledge about~~  
48 ~~cancer did not explain the increased psychological morbidity.[25, 30] However~~



1  
2  
3  
4  
5  
6 of particular interest were the marked differences in coping styles between the  
7  
8 two groups of patients.  
9

10  
11 At ~~baseline presentation~~ the rates of fatalism helplessness/hopelessness and  
12 domains of denial were far higher among BSA patients and there was a strong  
13  
14 correlation between these ~~potentially maladaptive~~ coping strategies and the  
15  
16 incidence of ~~anxiety and~~ depression in both ethnic groups.  
17  
18

19 Helplessness/hopelessness is strongly associated with ~~anxiety and~~ depression  
20  
21 [\[50, 20, 51–55\]](#) as we found globally, findings replicated in this study. [\[31–37\]](#) A  
22  
23 similar pattern was seen in the use of cognitive avoidance. Fatalism too was  
24  
25 associated with higher levels of ~~anxiety and~~ ~~depressive symptoms~~ as  
26  
27 demonstrated on both the PHQ-9 and HADS which supports research from  
28  
29 India [\[5638, 3957\]](#) and ~~maladaptive behaviours in~~ the UK. [\[58, 59\]](#) into the use  
30  
31 of ~~potentially maladaptive behaviours~~. [40, 41\]](#)  
32  
33

34  
35 In our previous study [\[175\]](#) denial was significantly related to depression in both  
36  
37 BW and BSA patients. BSA patients were far more likely to agree with the  
38  
39 statement in the MAC questionnaire (Question 38) 'I don't really believe I have  
40  
41 cancer'. In this study a minority of patients denied their diagnosis but again it  
42  
43 was more common among BSA patients ~~using via~~ the same indicator until ~~9~~ nine  
44  
45 months (MW presentation p=0.0005, 3 months p=0.001, 9 months p=0.2).  
46

47 Initially this was strongly associated with ~~anxiety and~~ depression however the  
48  
49 sample numbers were too small to consider longitudinal associations.  
50  
51  
52  
53  
54  
55  
56  
57  
58  
59  
60

1  
2  
3  
4  
5  
6  
7  
8  
9  
10  
11  
12  
13  
14  
15  
16  
17  
18  
19  
20  
21  
22  
23  
24  
25  
26  
27  
28  
29  
30  
31  
32  
33  
34  
35  
36  
37  
38  
39  
40  
41  
42  
43  
44  
45  
46  
47  
48  
49  
50  
51  
52  
53  
54  
55  
56  
57  
58  
59  
60

What is puzzling is that although BSA patients remained more depressed ~~and~~ ~~anxious~~ than BW patients longitudinally, by ~~3~~three and ~~9~~nine months the use of coping strategies did not explain this. At three months the only difference was in helplessness/hopelessness scores (-p=0.043) and by nine months the ethnic differences in the use of coping strategies were insignificant. Interestingly- by nine ~~With the exception of helplessness/hopelessness at 3 months (p=0.043) the ethnic differences in use of coping strategies are insignificant months but~~ the trend towards higher ~~anxiety and~~ depression among BSA patients remained. Even taking into account a lag time for the alleviation of depressive symptoms ~~of anxiety and depression~~ after less use of maladaptive coping, there remains an incomplete explanation as to why more BSA patients in particular remain so distressed. Our ~~second~~ hypothesis that a greater use of maladaptive coping strategies would reflect higher rates of depressive symptoms was therefore only partially confirmed. A retrospective audit into referral to psycho oncology or prescribing patterns of psychotropic medication in the two groups did not suggest a difference that could account for this.

We considered whether the burden of physical symptoms explained this ethnic gap. BSA patients were more likely to report physical symptoms at baseline and at three months. This was particularly true for BSA patients experienced significantly more ~~pain, nausea, skin concerns, mouth sores, tingling and feeling swollen. These symptoms peaked at three months but there was no statistically significant difference in symptomatology between the two groups by nine months with the exception of pain significantly increased in BSA patients by nine months.~~ However the ethnic differences in depressive symptoms

1  
2  
3  
4  
5  
6 ~~persisted~~persisted to nine months. ~~at 3 months,~~ which may account for the peak  
7  
8 in depression particularly among BSA patients at that time but the ethnic  
9  
10 difference in anxiety and depression persisted with only one symptom (pain)  
11  
12 indicating an ethnic difference at 9 months. Possible explanations include the  
13  
14 somatisation of physical symptoms being undetected, inadequate symptom  
15  
16 management, non-compliance due to a lack of literacy and language skills or  
17  
18 for a patient preference for traditional medicines for symptom control purposes.  
19  
20 The somatisation of physical symptoms notwithstanding, this is insufficient  
21  
22 evidence to explain the difference. Our findings reflect the greater symptom  
23  
24 burden found in other ethnic minority cancer patients, such as among Chinese  
25  
26 and Hispanic populations [31, 32Yoon, 2008, Fu 2009].

27  
28  
29  
30 ~~T~~his study supports the original hypothesis that more BSA cancer patients  
31  
32 would self-report depressive symptoms than BW patient over time. Our  
33  
34 hypothesis that a greater use of potentially maladaptive coping strategies would  
35  
36 ~~refe~~lectreflect higher rates of depression among BSA patients was supported  
37  
38 but only until the three month point. A heavier symptom burden among BSA  
39  
40 patients does appear to contribute to depression rates among this ethnic  
41  
42 minority compared to the host population.

43  
44  
45 We wonder whether greater involvement of the General Practitioner (GP) at a  
46  
47 very early stage may reduce anxiety and depression in BSA patients given the  
48  
49 difference between BW and BSA patients' preferences for the source of  
50  
51 information about their cancer. In an earlier study 66.2% of BSA compared to  
52  
53 5.1% BW wrote that they would prefer to receive their cancer diagnosis from  
54  
55

1  
2  
3  
4  
5  
6 their GP ( $p=0.001$ ).<sup>[42]</sup> In this study 49.5% of BSA patients' preferred source of  
7  
8 sensitive information was their GP compared to 16.9% of BW patients  
9  
10 ( $p=0.0001$ ). The main reason why the GP is the preferred source of information  
11  
12 is that the majority of BSA patients prefer to discuss their illness in their mother  
13  
14 tongue.<sup>[42]</sup> Of note is that 89% of BSA patients in this series were registered  
15  
16 with a BSA GP.

### 17 Limitations

18  
19  
20  
21 Limitations to the study are acknowledged. The BSA sample largely represents  
22  
23 cancer patients within the Leicester Indian population and although of interest to  
24  
25 other BSA cancer populations, these findings may not represent them. In  
26  
27 addition there was a large sample of patients with breast cancer, which risks  
28  
29 underrepresentation of those patients with other body site cancers.  
30  
31 Difficulties in recruitment and retaining BSA participants by nine months  
32  
33 reduced the sample size.<sup>[60]</sup> (Symonds, 2012) was no 32. Self reportedSelf-  
34  
35 reported questionnaires indicate the presence of depressive symptoms but  
36  
37 given the absence of psychiatric interviews this is not diagnostic of a depressive  
38  
39 disorder.

40  
41  
42  
43 -Modulations in patient mood between the three data collection points are not  
44  
45 represented. It is also likely that depressive symptoms are underreported since  
46  
47 anecdotally those who were most distressed often did not feel able to participate  
48  
49 in the study.

### 50 **Recommendations**

1  
2  
3  
4  
5  
6 The decreased use of maladaptive coping strategies among BSA patients in the  
7 first few months after diagnosis requires investigation, the aim being to reduce  
8 the associated distress earlier along the cancer trajectory. Evidence of greater  
9 distress among BSA patients caused by a heavier symptom burden than among  
10 BW patients also needs further study since several potential causes are  
11 reversible by proactive patient assessments during cancer treatment and follow-  
12 up.  
13  
14  
15  
16  
17  
18  
19

## 20 21 22 **Conclusion**

23 Health professionals need to be aware of a greater probability of depressive  
24 symptomatology and how this may present clinically, including somatic  
25 symptoms, in the first nine months after diagnosis if this ethnic disparity in  
26 mental wellbeing is to be addressed.  
27  
28  
29  
30  
31

32  
33 ~~The nature of coping strategies among BSA patients in the first few months after~~  
34 ~~diagnosis requires investigation, the aim being to reduce the associated distress~~  
35 ~~as early as possible along the cancer trajectory. Further investigation into the~~  
36 ~~role of the GP in partnership to support patients, particularly for BSA patients, is~~  
37 ~~advised.~~  
38  
39  
40  
41  
42

43  
44  
45 ~~This study provides evidence of worryingly high levels of anxiety and depression~~  
46 ~~among the largest ethnic minority in the UK. Further investigation is required if~~  
47 ~~this disparity is to be reduced.~~  
48  
49  
50  
51  
52  
53  
54

## References

1. Kennard BD, Stewart SM, Olvera R, et al. Nonadherence in Adolescent Oncology Patients: Preliminary Data on Psychological Risk Factors and Relationships to Outcome. *J Clin Psychol Med S* 2004;**11**:31-39. DOI [0.1023/B:JOCS.0000016267.21912.74](https://doi.org/10.1023/B:JOCS.0000016267.21912.74).
2. Steginga SK, Campbell A, Ferguson M, et al. Socio-demographic, psychosocial and attitudinal predictors of help seeking after cancer. *Psychooncology* 2008;**17**:997-1005. DOI [10.1002/pon.1317](https://doi.org/10.1002/pon.1317).
3. Satin JR, Linden W, Phillips MJ. Depression as a predictor of disease progression and mortality in cancer patients: a meta-analysis. *Cancer* 2008;**115**:5349-5361.
4. Mitchell AJ, Chan M, Bhatti H, et al. Prevalence of depression, anxiety, and adjustment disorder in oncological, haematological, and palliative-care settings: a meta-analysis of 94 interview-based studies. *Lancet Oncol* 2011;**12**:160-174. DOI:[10.1016/S1470-2045\(11\)70002-X](https://doi.org/10.1016/S1470-2045(11)70002-X).
5. Hinz A, Krauss O, Hauss JP, et al. Anxiety and depression in cancer patients compared with the general population. *Eur J Cancer Care* 2010;**19**:522-529. DOI [10.1111/j.1365-2354.2009.01088.x](https://doi.org/10.1111/j.1365-2354.2009.01088.x).

- 1  
2  
3  
4  
5  
6  
7  
8  
9  
10  
11  
12  
13  
14  
15  
16  
17  
18  
19  
20  
21  
22  
23  
24  
25  
26  
27  
28  
29  
30  
31  
32  
33  
34  
35  
36  
37  
38  
39  
40  
41  
42  
43  
44  
45  
46  
47  
48  
49  
50  
51  
52  
53  
54  
55  
56  
57  
58  
59  
60
6. [Weich S, Nazroo J, Sproston K, et al. Common mental disorders and ethnicity in England: the EMPIRIC study. \*Psychol Med\* 2004;\*\*34\*\*:1543-1551.](#)
  7. [Shavers VL, Brown ML. Racial and ethnic disparities in the receipt of cancer treatment. \*J Natl Cancer Inst\* 2002;\*\*94\*\*:334-57.](#)
  8. [Ward E, Jemal A, Cokkinides V, et al. Cancer disparities by race/ethnicity and socioeconomic status. \*CA Cancer J Clin\* 2004;\*\*54\*\*:78-93.](#)
  9. [All party parliamentary group on cancer \(2009\) Report of the all party parliamentary group of cancer's enquiry into inequalities in cancer available at \[www.appq-cancer.uk\]\(http://www.appq-cancer.uk\).](#)
  10. [Department of Health \(2007\). Cancer Reform Strategy available at \[http://www.dh.gov.uk/prod\\\_consum\\\_dh/groups/dh\\\_digitalassets/documents/digitalasset/dh\\\_081007.pdf\]\(http://www.dh.gov.uk/prod\_consum\_dh/groups/dh\_digitalassets/documents/digitalasset/dh\_081007.pdf\), The Stationery Office, UK.](#)
  11. [Department of Health \(2011\) Improving outcomes a strategy for cancer via \[http://www.dh.gov.uk/prod\\\_consum\\\_dh/groups/dh\\\_digitalassets/documents/digitalasset/dh\\\_123394.pdf\]\(http://www.dh.gov.uk/prod\_consum\_dh/groups/dh\_digitalassets/documents/digitalasset/dh\_123394.pdf\), Department of Health, London.](#)
  12. [Goss E, Lopez AM, Brown CL, Wollins DS, Brawley OQ, Raghavan D. American Society of Clinical Oncology policy statement: disparities in](#)

1  
2  
3  
4  
5  
6 [cancer care. \*J Clin Oncol\* 2009;27:2881-2885, DOI](#)

7  
8 [10.1200/JCO.2008.21.1680.](#)

9  
10  
11 [13. US Department of Health and Human Services \(2011\) President's](#)

12 [Cancer Panel: American's demographic and cultural transformations:](#)

13 [Implications for cancer Washington DC 1-100.](#)

14  
15  
16 [14. Department of Health and Human Services \(USA\) \(2011\), HHS Action](#)

17 [plan to reduce racial and ethnic health disparities available via](#)

18 [http://minorityhealth.hhs.gov/npa/files/Plans/HHS/HHS\\_Plan\\_complete.p](#)

19 [df, Department of Health and Human Services, Washington DC.](#)

20  
21  
22 [15. Bhopal R. Glossary of terms relating to ethnicity and race: for reflection](#)

23 [and debate. \*J Epidemiol Community Health\* 58 p. 441-445 DOI:](#)

24 [10.1136/jech.2003.013466.](#)

25  
26  
27 [16. Office for National Statistics 2011 census ethnic groups: local authorities](#)

28 [in England and Wales Table KS201EW](#)

29 [http://www.ons.gov.uk/ons/search/index.html?newquery=KS201EW.](#)

30  
31  
32 [17. Roy R, Symonds RP, Kumar DM, Ibrahim K, Mitchell A, Fallowfield L.](#)

33 [The use of denial in an ethnically diverse British cancer population: a](#)

34 [cross-sectional study. \*Br J Cancer\* 2005;92:1393-1397,](#)

35 [doi:10.1038/sj.bjc.6602523](#)



- 1  
2  
3  
4  
5  
6  
7  
8  
9  
10  
11  
12  
13  
14  
15  
16  
17  
18  
19  
20  
21  
22  
23  
24  
25  
26  
27  
28  
29  
30  
31  
32  
33  
34  
35  
36  
37  
38  
39  
40  
41  
42  
43  
44  
45  
46  
47  
48  
49  
50  
51  
52  
53  
54  
55  
56  
57  
58  
59  
60
18. [Lockett T, Butow PN, King MT, Oguchi M, Heading G, Hackl NA, et al. A review and recommendations for optimal outcome measures of anxiety, depression and general distress in studies evaluating psychosocial interventions for English-speaking adults with heterogeneous cancer diagnoses. \*Support Care Cancer\* 2010;\*\*18\*\*:1241-1262, DOI \[10.1007/s00520-010-0932-8\]\(#\).](#)
19. [Carlson LE, Groff SL, Maciejewski O, Bultz B.D. Screening for distress in lung and breast cancer outpatients: a randomized controlled trial. \*J Clin Oncol\* 2010;\*\*28\*\*:4884-4891, DOI \[0.1200/JCO.2009.27.3698\]\(#\).](#)
20. [Akechi T, Okuyama T, Sugawara Y, Nakano T, Shima Y Uchitomi Y Major depression, adjustment disorders, and post-traumatic stress disorder in terminally ill cancer patients: associated and predictive factors. \*J Clin Oncol\* 2004;\*\*22\*\*: 1957-1965, DOI \[10.1200/JCO.2004.08.149\]\(#\).](#)
21. [Stark D, Kiely M, Smith A, Velikova G, House A Selby P. Anxiety Disorders in Cancer Patients: Their Nature, Associations, and Relation to Quality of Life. \*J Clin Oncol\* 2002;\*\*20\*\*\(14\):3137-3148.](#)
22. [Clarke JA, Inu, TS, Silliman RA, Bokhour BG, Krasnow SH, Robinson RA et al. Patients' perceptions of quality of life after treatment for early prostate cancer. \*J Clin Oncol\* 2003;\*\*21\*\*:3777-3784.](#)

- 1  
2  
3  
4  
5  
6  
7  
8  
9  
10  
11  
12  
13  
14  
15  
16  
17  
18  
19  
20  
21  
22  
23  
24  
25  
26  
27  
28  
29  
30  
31  
32  
33  
34  
35  
36  
37  
38  
39  
40  
41  
42  
43  
44  
45  
46  
47  
48  
49  
50  
51  
52  
53  
54  
55  
56  
57  
58  
59  
60
23. [Hoyer M, Johansson B, Nordin K, Bergkvist L, Ahlgren J, Lidin-Linqvist A et al. Health-related quality of life among women with breast cancer-a population-based study. \*Acta Oncologica\* 2011;\*\*50\*\*\(7\):1015-1026.](#)
24. [Lazarus RS, Folkman S, Adams S. \*Stress, appraisal and coping\*. Springer, New York; 1984.](#)
25. [Moos RH, Holahan CJ. Dispositional and contextual perspectives on coping: toward an integrative framework. \*J Clin Psychol\* 2003;\*\*59\*\*\(12\):1387-1403.](#)
26. [Hopwood P, Stephens RJ. Depression in patients with lung cancer: prevalence and risk factors derived from quality-of-life data. \*J Clin Oncol\* 2000;\*\*18\*\*\(4\):893-903.](#)
27. [Breen SJ, Baravelli CM, Schofield PE, Jeffor M, Yates PM, Aranda SK. Is symptom burden a predictor of anxiety and depression in patients with cancer about to commence chemotherapy? \*MJA\* 2009;\*\*190\*\*\(7\):s99-s104](#)
28. [Shi Q, Smith TG, Michonski JD, Stein KD, Kaw C, Cleeland CS. Symptom Burden in Cancer Survivors 1 Year After Diagnosis. \*Cancer\* 2011;\*\*117\*\*:2779–90, 10.1002/cncr.26146.](#)
29. [Kroenke K, Johns SA, Theobald D, Wu J, Tu W. Somatic symptoms in cancer patients trajectory over 12 months and impact on functional status](#)

1  
2  
3  
4  
5  
6  
7 [and disability. \*Support Care Cancer\* 2013;\*\*21\*\*:765-773, DOI](#)  
8 [10.1007/s00520-012-1578-5.](#)

9  
10  
11  
12 [30. Lam WWT, Bonanno GA, Mancini AD, Ho S, Chan M, Hung WK, et al.](#)  
13 [Trajectories of psychological distress among Chinese women diagnosed](#)  
14 [with breast cancer. \*Psycho Oncol\* 2010;\*\*19\*\*:1044-1051,](#)  
15 [DOI10.1002/pon.1658.](#)

16  
17  
18  
19  
20  
21  
22 [31. Fu OS, Crew KD, Jacobson JS, Greenlee H, Yu G, Campbell J, et al.](#)  
23 [Ethnicity and persistent symptom burst in breast cancer survivors J](#)  
24 [Cancer Surviv 2009;\*\*3\*\*: 241-250, DOI 10.1007/s11764-009-0100-7.](#)

25  
26  
27  
28  
29  
30  
31 [32. Yoon J, Malin JL, Tisnado DM, Tao ML, Adams JL, Timmer MJ et al.](#)  
32 [Symptom management after breast cancer treatment: is it influenced by](#)  
33 [patient characteristics? \*Breast Cancer Res Treat\* 2008;\*\*108\*\*\(1\):69-77.](#)

34  
35  
36  
37  
38  
39  
40 [33. Zigmond AS, Snaith RP. The hospital anxiety and depression scale. \*Acta\*](#)  
41 [Psychiatr Scand 1983;\*\*67\*\*:361-370.](#)

42  
43  
44  
45  
46  
47  
48  
49  
50  
51  
52  
53  
54  
55  
56  
57  
58  
59  
60 [34. Mitchell AJ, Baker-Glenn EA, Park B, Granger L, Symonds P. Can the](#)  
[Distress Thermometer be improved by additional mood domains? Part II.](#)  
[What is the optimal combination of Emotion Thermometers? \*Psycho-\*](#)  
[oncology 2010;\*\*19\*\*:134-140, DOI 10.1002/pon.1557.](#)

- 1  
2  
3  
4  
5  
6  
7  
8  
9  
10  
11  
12  
13  
14  
15  
16  
17  
18  
19  
20  
21  
22  
23  
24  
25  
26  
27  
28  
29  
30  
31  
32  
33  
34  
35  
36  
37  
38  
39  
40  
41  
42  
43  
44  
45  
46  
47  
48  
49  
50  
51  
52  
53  
54  
55  
56  
57  
58  
59  
60
35. Roth AJ, Kornblith AB, Batel-Copel L, Peabody E, Scher HI, Holland JC.  
[Rapid screening for psychologic distress in men with prostate carcinoma:  
a pilot study. \*Cancer\* 1998;\*\*82\*\*:1904-1908.](#)
36. Brislin RW. [Back-translation for cross-cultural research. \*Journal of Cross-  
cultural Psychology\* 1970;\*\*1\*\*:185-216, doi:  
\[10.1177/135910457000100301.\]\(#\)](#)
37. Kochhar PH, Rajadhyaksha SS, Suvarna VR. [Translation and validation  
of brief patient health questionnaire against DSM IV as a tool to diagnose  
major depressive disorder in Indian patients. \*J Postgrad Med\*  
\*2007\*;\*\*53\*\*:102-107.](#)
38. Watson M, Law M, Dossantos M, Greer S, Baruch J, Bliss JM. [The Mini-  
Mac: Further development of the mental adjustment to cancer scale. \*J\*  
\*Psychosoc Oncol\* 1994;\*\*12\*\*:33-46.](#)
39. Von Elm E, Altman DG, Egger M, Pocock SJ, Gotschep C,  
[Vandenbrouche JP. The strengthening the Reporting of Observational  
Studies in Epidemiology \(STROBE\) Statement Epidemiology  
\*2007\*;\*\*18\*\*\(6\):800-804.](#)
40. [Snaith RP. The Hospital Anxiety and Depression Scale. \*Health Qual Life\*  
\*Outcomes\* 2003;\*\*1\*\*:29.](#)

- 1  
2  
3  
4  
5  
6  
7  
8  
9  
10  
11  
12  
13  
14  
15  
16  
17  
18  
19  
20  
21  
22  
23  
24  
25  
26  
27  
28  
29  
30  
31  
32  
33  
34  
35  
36  
37  
38  
39  
40  
41  
42  
43  
44  
45  
46  
47  
48  
49  
50  
51  
52  
53  
54  
55  
56  
57  
58  
59  
60
41. Morse R, Kendell K, Barton S. Screening for depression in people with cancer: the accuracy of the hospital anxiety and depression scale. *Clin Eff Nurs* 2005;**9**:188-196.
42. Bjelland I, Dahl AA, Haug TT, Neckelmann D. The validity of the Hospital Anxiety and Depression Scale. An updated literature review. *J Psychosomatic Res* 2002;**52**(2):69-77.
43. Kroenke K, Spitzer RL, Williams JBW. The PHQ-9 validity of a brief depression severity measure. *J Gen Intern Med* 2001;**16**:605-613.
44. National Comprehensive Cancer Network 2011, December 10th 2010-last update, *NCCN guidelines: distress management* [Homepage of National Comprehensive Cancer Network], [Online]. [http://www.nccn.org/professionals/physician\\_gls/f\\_guidelines.asp](http://www.nccn.org/professionals/physician_gls/f_guidelines.asp) [2011, 9/ 25].
45. Office for National Statistics 2011, "*Neighbourhood Statistics 'Summary Statistics', citing indices of deprivation, 2007, UK Department for Communities and Local Government* [Homepage of Office for National Statistics], [Online]. <http://www.neighbourhood.statistics.gov.uk/> [2007-2011].
46. Lazarus RS. Coping theory and research: past, present and future. *Psychosom Med* 1993;**55**(3):234-247.

- 1  
2  
3  
4  
5  
6  
7  
8  
9  
10  
11  
12  
13  
14  
15  
16  
17  
18  
19  
20  
21  
22  
23  
24  
25  
26  
27  
28  
29  
30  
31  
32  
33  
34  
35  
36  
37  
38  
39  
40  
41  
42  
43  
44  
45  
46  
47  
48  
49  
50  
51  
52  
53  
54  
55  
56  
57  
58  
59  
60
47. [National Institute for Health and Clinical Excellence \(NICE\) 2011, February 2010-last update, Clinical knowledge summaries \(CKS\) clinical topics. Depression; Available via \[http://www.cks.nhs.uk/depression/management/scenario\\\_bereavement/vi\]\(http://www.cks.nhs.uk/depression/management/scenario\_bereavement/vi\) \[ew\\\_full\\\_scenario#-402794\]\(http://www.cks.nhs.uk/depression/management/scenario\_bereavement/vi\) \[2012, 26/6\].](#)
48. [Ashing-Giwa KT, Tejero JS, Kim J, Padilla GV, Hellemann G. Examining predictive models of HRQOL in a population-based, multiethnic sample of women with breast carcinoma. \*Qual Life Res\* 2007;\*\*16\*\*:413-428, DOI \[10.1007/s11136-006-9138-4\]\(https://doi.org/10.1007/s11136-006-9138-4\).](#)
49. [Eil K, Sanchez K, Vourlekis B, Lee PJ, Dwight-Johnson M, Lagomasino I et al. Depression, correlates of depression and receipt of depression care among low-income women with breast or gynecologic cancer. \*J Clin Oncol\* 2005;\*\*23\*\*:3052-3060, DOI \[10.1200/JCO.2005.08.041\]\(https://doi.org/10.1200/JCO.2005.08.041\)](#)
50. [Osborne RH, Elsworth GR, Hopper JL. Age-specific norms and determinants of anxiety and depression in 731 women with breast cancer recruited through a population-based cancer registry. \*Eur J Cancer\* 2003;\*\*39\*\*:755-762.](#)
51. [Schou I, Ekeberg O, Ruland CM, Sandvik L, Karesen R. Pessimism as a predictor of emotional morbidity one year following breast cancer surgery. \*Psychooncology\* 2004;\*\*13\*\*:309-320. DOI \[10.1002/pon.747\]\(https://doi.org/10.1002/pon.747\).](#)

1  
2  
3  
4  
5  
6  
7  
8  
9  
10  
11  
12  
13  
14  
15  
16  
17  
18  
19  
20  
21  
22  
23  
24  
25  
26  
27  
28  
29  
30  
31  
32  
33  
34  
35  
36  
37  
38  
39  
40  
41  
42  
43  
44  
45  
46  
47  
48  
49  
50  
51  
52  
53  
54  
55  
56  
57  
58  
59  
60

52. [Brothers BM, Andersen BL. Hopelessness as a predictor of depressive symptoms for breast cancer patients coping with recurrence. \*Psychooncology\* 2009;\*\*18\*\*:267-275, DOI 10.1002/pon.1394.](#)

53. [Lo C, Zimmermann C, Rydall A, Walsh A, Jones JM, Moore MJ et al. Longitudinal Study of Depressive Symptoms in Patients with Metastatic Gastrointestinal and Lung Cancer. \*J Clin Oncol\* 2010;\*\*28\*\*:3084, DOI 10.1200/JCO.2009.26.9712.](#)

54. [Grassi L, Travado L, Gil F, Sabato S, Rossi E, Tomamichel M et al. Hopelessness and related variables among cancer patients in the Southern European Psycho-Oncology Study \(SEPOS\). \*Psychosomatics\* 2010;\*\*51\*\*:201-207, DOI 10.1176/appi.psy.51.3.201.](#)

55. [Johansson M, Ryden A, Finizia C. Mental adjustment to cancer and its relation to anxiety, depression, HRQL and survival in patients with laryngeal cancer - A longitudinal study. \*BMC Cancer\* 2011;\*\*11\*\*:283, DOI 10.1186/1471-2407-11-283.](#)

56. [Chaturvedi SK, Chandra PS, Channabasavanna SM, Anantha N, Reddy BKM, Sharma S. Levels of anxiety and depression in patients receiving radiotherapy in India. \*Psychooncology\* 1996;\*\*5\*\*:343-346, DOI: 10.1002/\(SICI\)1099-1611\(199612\).](#)

1  
2  
3  
4  
5  
6  
7  
8  
9  
10  
11  
12  
13  
14  
15  
16  
17  
18  
19  
20  
21  
22  
23  
24  
25  
26  
27  
28  
29  
30  
31  
32  
33  
34  
35  
36  
37  
38  
39  
40  
41  
42  
43  
44  
45  
46  
47  
48  
49  
50  
51  
52  
53  
54  
55  
56  
57  
58  
59  
60

57. [Kishore J, Ahmad I, Kaur R, Mohanta PK. Beliefs and perceptions about cancers among patients attending radiotherapy OPD in Delhi, India. \*Asian Pac J Cancer Prev\* 2008;\*\*9\*\*:155-158.](#)

58. [Szczepura A, Price C, Gumber A. Breast and bowel cancer screening uptake patterns over 15 years for UK South Asian ethnic minority populations corrected for differences in socio-demographic characteristics. \*BMC Public Health\* 2008;\*\*8\*\*:346.](#)

59. [Miles A, Rainbow S, von Wagner C. Cancer Fatalism and Poor Self-Rated Health Mediate the Association between Socioeconomic Status and Uptake of Colorectal Cancer Screening in England. \*Cancer Epidemiol Biomarkers Prev\* 2011;\*\*20\*\*:2132-2140, DOI 10.1158/1055-9965.EPI-11-0453.](#)

60. [Symonds RP, Lord K, Mitchel AJ, Raghavan D. Recruitment of ethnic minorities into clinical trials: experience from the front lines, \*Br J Cancer\*, 2012;\*\*107\*\*:1017-1021.](#)

#### **References**

[Akechi T, Okuyama T, Sugawara Y, Nakano T, Shima Y Uchitomi Y \(2004\) Major depression, adjustment disorders, and post-traumatic stress disorder in terminally ill cancer patients: associated and predictive factors. \*J Clin Oncol\* \*\*22\*\*:1957-1965, DOI-10.1200/JCO.2004.08.149](#)



1  
2  
3  
4  
5  
6 [All party parliamentary group on cancer \(2009\) Report of the all party](#)  
7 [parliamentary group of cancer's enquiry into inequalities in cancer available at](#)  
8 [www.appg-cancer.uk](#)  
9

10  
11  
12  
13  
14 [Ashing-Giwa KT, Tejero JS, Kim J, Padilla GV, Hellemann G \(2007\) Examining](#)  
15 [predictive models of HRQOL in a population-based, multiethnic sample of](#)  
16 [women with breast carcinoma. \*Qual Life Res\* 16: 413-428. DOI](#)  
17 [10.1007/s11136-006-9138-4](#)  
18  
19

20  
21  
22  
23  
24  
25  
26 [Bhopal R, 2003, "Glossary of terms relating to ethnicity and race: for reflection](#)  
27 [and debate" \*Journal of Epidemiology & Community Health\* 58 p. 441-445](#)  
28 [DOI: 10.1136/jech.2003.013466](#)  
29

30  
31  
32  
33  
34  
35 [Brislin, R.W. 1970, "Back-translation for crosscultural research", \*Journal of\*](#)  
36 [Cross-Cultural Psychology](#), vol. 1, pp. 185-216.  
37  
38

39  
40  
41  
42  
43 [Broadbent E, Petrie KJ, Main J, Weinman J \(2006\) The brief illness perception](#)  
44 [questionnaire. \*J Psychosom Res\* 60: 631-637. DOI](#)  
45 [10.1016/j.jpsychores.2005.10.020](#)  
46  
47

Formatted: Indent: Left: 0", First line: 0"

Formatted: Line spacing: Double

Formatted: Line spacing: Double

Formatted: Indent: Left: 0", First line: 0"

Formatted: Indent: Left: 0", First line: 0"

1  
2  
3  
4  
5  
6 [Brothers BM, Andersen BL \(2009\) Hopelessness as a predictor of depressive](#)  
7 [symptoms for breast cancer patients coping with recurrence. \*Psycho-oncology\*](#)  
8 [18: 267-275, DOI 10.1002/pon.1394](#)  
9

Formatted: Indent: Left: 0", First line: 0"

10  
11  
12  
13  
14 [Carlson LE, Groff SL, Maciejewski O, Bultz B-D \(2010\) Screening for distress in](#)  
15 [lung and breast cancer outpatients: a randomized controlled trial. \*J Clin Oncol\*](#)  
16 [28: 4884-4891, DOI 0.1200/JCO.2009.27.3698](#)  
17

Formatted: Adjust space between Latin and Asian text, Adjust space between Asian text and numbers

18  
19  
20  
21  
22 [Chaturvedi SK, Chandra PS, Channabasavanna SM, Anantha N, Reddy BKM,](#)  
23 [Sharma S \(1996\) Levels of anxiety and depression in patients receiving](#)  
24 [radiotherapy in India. \*Psychooncology\* 5: 343-346, DOI: 10.1002/\(SICI\)1099-](#)  
25 [1611\(1996\)12](#)  
26

Formatted: Indent: Left: 0", First line: 0"

27  
28  
29  
30  
31  
32 [Department of Health \(2011\) Improving outcomes a strategy for cancer via](#)  
33 [http://www.dh.gov.uk/prod\\_consum\\_dh/groups/dh\\_digitalassets/documents/digit](#)  
34 [alasset/dh\\_123394.pdf, Department of Health, London](#)  
35

Formatted: Indent: Left: 0", First line: 0"

36  
37  
38  
39  
40  
41 [Department of Health \(2007\), Cancer Reform Strategy available at](#)  
42 [http://www.dh.gov.uk/prod\\_consum\\_dh/groups/dh\\_digitalassets/documents/digit](#)  
43 [alasset/dh\\_081007.pdf, The Stationery Office, UK](#)  
44

Formatted: Indent: Left: 0", First line: 0"

45  
46  
47 [Department of Health and Human Services \(USA\) \(2011b\), HHS Action plan to](#)  
48 [reduce racial and ethnic health disparities available via](#)  
49 [http://minorityhealth.hhs.gov/npa/files/Plans/HHS/HHS\\_Plan\\_complete.pdf,](#)  
50  
51 [Department of Health and Human Services, Washington DC](#)  
52  
53

1  
2  
3  
4  
5  
6  
7  
8 [Eli K, Sanchez K, Vourlekis B, Lee PJ, Dwight Johnson M, Lagomasino I,](#)  
9 [Muderspach L, Russell C \(2005\) Depression, correlates of depression and](#)  
10 [receipt of depression care among low-income women with breast or](#)  
11 [gynecologic cancer. \*J Clin Oncol\* \*\*23\*\*: 3052-3060, DOI](#)  
12 [10.1200/JCO.2005.08.041](#)

13  
14  
15  
16  
17  
18  
19  
20 [Goss E, Lopez AM, Brown CL, Wollins DS, Brawley OQ, Raghavan D \(2009\)](#)  
21 [American Society of Clinical Oncology policy statement: disparities in cancer](#)  
22 [care. \*J Clin Oncol\* \*\*27\*\*: 2881-2885, DOI 10.1200/JCO.2008.21.1680](#)

23  
24  
25  
26  
27  
28 [Grassi L, Travado L, Gil F, Sabato S, Rossi E, Tomamichel M, Marmai L,](#)  
29 [Biancosino B, Nanni MG, Group TS \(2010\) Hopelessness and related variables](#)  
30 [among cancer patients in the Southern European Psycho-Oncology Study](#)  
31 [\(SEPOS\). \*Psychosomatics\* \*\*51\*\*: 201-207, DOI 10.1176/appi.psy.51.3.201](#)

32  
33  
34  
35  
36  
37 [Hinz A, Krauss O, Hauss JP, Hockel M, Kortmann RD, Stolzenburg JU, Schwarz](#)  
38 [R \(2010\) Anxiety and depression in cancer patients compared with the general](#)  
39 [population. \*Eur J Cancer Care\* \*\*19\*\*: 522-529,](#)  
40 [DOI 10.1111/j.1365-2354.2009.01088.x](#)

41  
42  
43  
44  
45  
46  
47 [Johansson M, Ryden A, Finizia C \(2011\) Mental adjustment to cancer and its](#)  
48 [relation to anxiety, depression, HRQL and survival in patients with laryngeal](#)  
49 [cancer – A longitudinal study. \*BMC Cancer\* \*\*11\*\*: 283, DOI 10.1186/1471-2407-](#)  
50 [11-283](#)

Formatted: Indent: Left: 0", First line: 0"

Formatted: Adjust space between Latin and Asian text, Adjust space between Asian text and numbers

Formatted: Indent: Left: 0", First line: 0"

Formatted: Indent: Left: 0", First line: 0"

1  
2  
3  
4  
5  
6  
7  
8  
9  
10  
11  
12  
13  
14  
15  
16  
17  
18  
19  
20  
21  
22  
23  
24  
25  
26  
27  
28  
29  
30  
31  
32  
33  
34  
35  
36  
37  
38  
39  
40  
41  
42  
43  
44  
45  
46  
47  
48  
49  
50  
51  
52  
53  
54  
55  
56  
57  
58  
59  
60

[Kennard BD, Stewart SM, Olvera R, Bawdon RE, O hAilin A, Lewis CP Winick NJ \(2004\) Nonadherence in Adolescent Oncology Patients: Preliminary Data on Psychological Risk Factors and Relationships to Outcome. \*J Clin Psychol Med S\* \*\*11\*\*: 1: 31-39, DOI 0.1023/B:JOCS.0000016267.21912.74](#)

Formatted: Indent: Left: 0", First line: 0"

[King M, Nazareth I, Levy G, Walker C, Morris R, Weich S, Bellon-Saameno JA, Moreno B, Svab I, Rotar D, Rifel J, Maarros H, Aluoja A, Kalda R, Neeleman J, Geerlings MI, Xavier M, de Almeida MC, Correa B, Torres-Gonzalez F \(2008\) Prevalence of common mental disorders in general practice attendees across Europe. \*Br J Psychiatry\* \*\*192\*\*: 362-367, DOI 10.1192/bjp.bp.107.039966](#)

Formatted: Indent: Left: 0", First line: 0"

[Kishore J, Ahmad I, Kaur R, PKM \(2008\) Beliefs and perceptions about cancers among patients attending radiotherapy OPD in Delhi, India. \*Asian Pac J Cancer Prev\* \*\*9\*\*: 155-158.](#)

Formatted: Indent: Left: 0", First line: 0"

[Kochhar PH, Rajadhyaksha SS, Suvama VR \(2007\) Translation and validation of brief patient health questionnaire against DSM IV as a tool to diagnose major depressive disorder in Indian patients. \*J Postgrad Med\* \*\*53\*\*: 102-107.](#)

Formatted: Indent: Left: 0", First line: 0"

[Kroenke, K., Spitzer, R.L. & Williams, J.B.W. 2001, "The PHQ-9 validity of a brief depression severity measure", \*Journal of general internal medicine\*, vol. 16, pp. 605-613.](#)

Formatted: Indent: Left: 0", First line: 0",  
Line spacing: Double

Formatted: Indent: Left: 0", First line: 0"

1  
2  
3  
4  
5  
6 [Lo C, Zimmermann C, Rydall A, Walsh A, Jones JM, Moore MJ, Shepherd FA,](#)  
7 [Gagliese L, Rodin G \(2010\) Longitudinal Study of Depressive Symptoms in](#)  
8 [Patients with Metastatic Gastrointestinal and Lung Cancer. \*J Clin Oncol\* \*\*28\*\*:](#)  
9 [3084, DOI 10.1200/JCO.2009.26.9712](#)

Formatted: Indent: Left: 0", First line: 0"

14  
15  
16  
17  
18 [Lockett T, Butow PN, King MT, Oguchi M, Heading G, Hackl NA, Rankin N,](#)  
19 [Price MA \(2010\) A review and recommendations for optimal outcome](#)  
20 [measures of anxiety, depression and general distress in studies evaluating](#)  
21 [psychosocial interventions for English speaking adults with heterogeneous](#)  
22 [cancer diagnoses. \*Support Care Cancer\* \*\*18\*\*: 1241-1262, DOI 10.1007/s00520-](#)  
23 [010-0932-8](#)

Formatted: Indent: Left: 0", First line: 0"

29  
30  
31 [Miles A, Rainbow S, von Wagner C \(2011\) Cancer Fatalism and Poor Self-](#)  
32 [Rated Health Mediate the Association between Socioeconomic Status and](#)  
33 [Uptake of Colorectal Cancer Screening in England. \*Cancer Epidemiol\*](#)  
34 [Biomarkers Prev](#) **20**: 2132-2140, DOI 10.1158/1055-9965.EPI.11.0453

Formatted: Indent: Left: 0", First line: 0"

37  
38  
39  
40  
41 [Mitchell AJ \(2007\) Pooled results from 38 analyses of the accuracy of distress](#)  
42 [thermometer and other ultra-short methods of detecting cancer-related mood](#)  
43 [disorders. \*J Clin Oncol\* \*\*25\*\*: 4670-4681, DOI 10.1200/JCO.2006.10.0438](#)

Formatted: Indent: Left: 0", First line: 0"

46  
47  
48  
49 [Mitchell AJ, Baker Glenn EA, Park B, Granger L, Symonds P \(2010\) Can the](#)  
50 [Distress Thermometer be improved by additional mood domains? Part II. What](#)

1  
2  
3  
4  
5  
6 [is the optimal combination of Emotion Thermometers? \*Psychooncology\* \*\*19\*\*:](#)  
7  
8 [134-140, DOI 10.1002/pon.1557](#)

Formatted: Indent: Left: 0", First line: 0"

11 [Mitchell AJ, Chan M, Bhatti H, Halton M, Grassi L, Johansen C, Meader N](#)  
12 [\(2011\) Prevalence of depression, anxiety, and adjustment disorder in](#)  
13 [oncological, haematological, and palliative care settings: a meta-analysis of 94](#)  
14 [interview based studies. \*Lancet Oncol\* \*\*12\*\*: 160-174, DOI:10.1016/S1470-](#)  
15 [2045\(11\)70002-X](#)

Formatted: Indent: Left: 0", First line: 0"

21 [Mitchell AJ, Meader N, Symonds P \(2010\) Diagnostic validity of the Hospital](#)  
22 [Anxiety and Depression Scale \(HADS\) in cancer and palliative settings: a meta-](#)  
23 [analysis. \*J Affect Disord\* \*\*126\*\*: 335-348, DOI 10.1016/j.jad.2010.01.067](#)

Formatted: Indent: Left: 0", First line: 0"

29 [Mitchell AJ, Vaze A, Rao S \(2009\) Clinical diagnosis of depression in primary](#)  
30 [care: a meta-analysis. \*Lancet\* \*\*374\*\*: 609-619, DOI 10.1016/S0140-](#)  
31 [6736\(09\)60879-5](#)

Formatted: Indent: Left: 0", First line: 0"

37 [Morse R, Kendell K, Barton S \(2005\) Screening for depression in people](#)  
38 [with cancer: the accuracy of the hospital anxiety and depression scale.](#)  
39 [Clin Eff Nurs \*\*9\*\*: 188-196 DOI 10.1016/j.cein.2006.08.012](#)

Formatted: Adjust space between Latin and Asian text, Adjust space between Asian text and numbers

Formatted: Indent: Left: 0", First line: 0"

45 [Muthu Kumar D, Symonds RP, Sundar S, Ibrahim K, Savelyich BS, Miller E](#)  
46 [\(2004\) Information needs of Asian and White British cancer patients and their](#)  
47 [families in Leicestershire: a cross-sectional survey. \*Br J Cancer\* \*\*90\*\*: 1474-1478,](#)  
48 [doi:10.1038/sj.bjc.6601774](#)

1  
2  
3  
4  
5  
6  
7  
8 [National Comprehensive Cancer Network 2011, December 10th 2010 last](#)  
9 [update, NCCN guidelines: distress management \[Homepage of National](#)  
10 [Comprehensive Cancer Network\], \[Online\].](#)

11  
12  
13  
14 [http://www.nccn.org/professionals/physician\\_gls/f\\_guidelines.asp](http://www.nccn.org/professionals/physician_gls/f_guidelines.asp) [2011, 9/ 25].

15  
16  
17  
18 [National Institute for Health and Clinical Excellence \(NICE\) 2011, February](#)  
19 [2010 last update, Clinical knowledge summaries \(CKS\) clinical topics:](#)

20  
21 [Depression; Available via](#)

22 [http://www.cks.nhs.uk/depression/management/scenario\\_bereavement/view\\_full](http://www.cks.nhs.uk/depression/management/scenario_bereavement/view_full_scenario#_402794)  
23 [scenario#\\_402794](#) [2012, 26/6].

24  
25  
26  
27  
28  
29  
30 [Office for National Statistics 2011, "Neighbourhood Statistics 'Summary](#)  
31 [Statistics', citing indices of deprivation, 2007, UK Department for Communities](#)  
32 [and Local Government \[Homepage of Office for National Statistics\], \[Online\].](#)

33  
34  
35 <http://www.neighbourhood.statistics.gov.uk/> [2007-2011].

36  
37  
38  
39 [Osborne RH, Elsworth GR, Hopper JL \(2003\) Age-specific norms and](#)  
40 [determinants of anxiety and depression in 731 women with breast cancer](#)  
41 [recruited through a population-based cancer registry. \*Eur J Cancer\* \*\*39\*\*: 755-](#)  
42 [762.](#)

43  
44  
45  
46  
47  
48  
49 [US Department of Health and Human Services \(2011a\) President's Cancer](#)  
50 [Panel: American's demographic and cultural transformations: Implications for](#)  
51 [cancer Washington DC 1-100](#)

Formatted: Indent: Left: 0", First line: 0"

Formatted: Indent: Left: 0", First line: 0"

Formatted: Indent: First line: 0"

1  
2  
3  
4  
5  
6  
7  
8 [Roth AJ, Kornblith AB, Batel-Copel L, Peabody E, Scher HI, Holland JC \(1998\)](#)  
9 [Rapid screening for psychologic distress in men with prostate carcinoma: a pilot](#)  
10 [study. \*Cancer\* \*\*82\*\*: 1904-1908.](#)  
11  
12

Formatted: Indent: Left: 0", First line: 0"

13  
14  
15  
16 [Roy R, Symonds RP, Kumar DM, Ibrahim K, Mitchell A, Fallowfield L \(2005\)](#)  
17 [The use of denial in an ethnically diverse British cancer population: a cross-](#)  
18 [sectional study. \*Br J Cancer\* \*\*92\*\*: 1393-1397, doi:10.1038/sj.bjc.6602523](#)  
19  
20  
21

Formatted: Indent: Left: 0", First line: 0"

22  
23  
24 [Satin JR, Linden W, Phillips MJ \(2009\) Depression as a predictor of disease](#)  
25 [progression and mortality in cancer patients: a meta-analysis. \*Cancer\* \*\*115\*\*:](#)  
26 [5349-5361](#)  
27  
28

Formatted: Indent: Left: 0", First line: 0"

29  
30  
31 [Schou I, Ekeberg O, Ruland CM, Sandvik L, Karesen R \(2004\) Pessimism as a](#)  
32 [predictor of emotional morbidity one year following breast cancer surgery.](#)  
33  [\*Psychooncology\* \*\*13\*\*: 309-320, DOI 10.1002/pon.747](#)  
34  
35  
36

Formatted: Indent: Left: 0", First line: 0"

37  
38  
39 [Snaith, R.P. 2003, "The Hospital Anxiety and Depression Scale", \*Health and\*](#)  
40  [\*Quality of Life Outcomes\*, \*\*1\*\*, pp. 29.](#)  
41  
42  
43

Formatted: Indent: Left: 0", First line: 0",  
Line spacing: Double

44  
45  
46  
47 [Steginga SK, Campbell A, Ferguson M, Beeden A, Walls M, Cairns W, Dunn J](#)  
48 [\(2008\) Socio-demographic, psychosocial and attitudinal predictors of help](#)  
49 [seeking after cancer. \*Psychooncology\* \*\*17\*\*: 997-1005, DOI 10.1002/pon.1317](#)  
50  
51  
52

Formatted: Indent: Left: 0", First line: 0"



1  
2  
3  
4  
5  
6 [Symonds RP, Lord K, Mitchell AJ, Raghavan D \(2012\) Recruitment of ethnic](#)  
7 [minorities into clinical trials: experience from the front lines. \*Br J Cancer\* \*\*107\*\*:](#)  
8 [1017-1021](#)

9  
10  
11  
12  
13  
14 [Szezepura A, Price C, Gumber A \(2008\) Breast and bowel cancer screening](#)  
15 [uptake patterns over 15 years for UK South-Asian ethnic minority populations](#)  
16 [corrected for differences in socio-demographic characteristics. \*BMC Public\*](#)  
17 [Health \*\*8\*\*: 346](#)

18  
19  
20  
21  
22  
23  
24 [Von Elm, E, Altman, DG, Egger M et al. \(2007\) The strengthening the](#)  
25 [Reporting of Observational Studies in Epidemiology \(STROBE\) Statement](#)  
26 [Epidemiology \*\*18\*\* \(6\) p. 800-804](#)

27  
28  
29  
30  
31  
32 [Watson M, Law M, Dossantos M, Greer S, Baruch J, Bliss JM \(1994\) The Mini-](#)  
33 [Mac: Further development of the mental adjustment to cancer scale. \*J\*](#)  
34 [Psychosoc Oncol \*\*12\*\*: 33-46](#)

35  
36  
37  
38  
39  
40  
41 [Weich S, Nazroo J, Sproston K, McManus S, Blanchard M, Erens B, Karlsen S,](#)  
42 [King M, Lloyd K, Stansfeld S, Tyrer P \(2004\) Common mental disorders and](#)  
43 [ethnicity in England: the EMPIRIC study. \*Psychol Med\* \*\*34\*\*: 1543-1551](#)

44  
45  
46  
47 [Zigmond AS, Snaith RP \(1983\) The hospital anxiety and depression scale. \*Acta\*](#)  
48 [Psychiatr Scand \*\*67\*\*: 361-370](#)

1  
2  
3  
4  
5  
6  
7  
8 1. Kennard BD, Stewart SM, Olvera R, et al. Nonadherence in Adolescent  
9  
10 Oncology Patients: Preliminary Data on Psychological Risk Factors and  
11  
12 Relationships to Outcome. *J Clin Psychol Med S* 2004;**11**:1:31-39. DOI  
13  
14 0.1023/B:JOGS.0000016267.21912.74

Formatted: No bullets or numbering

15  
16  
17  
18 2. Steginga SK, Campbell A, Ferguson M, et al. Socio-demographic,  
19  
20 psychosocial and attitudinal predictors of help seeking after cancer.  
21  
22 *Psychooncology* 2008;**17**:997-1005. DOI 10.1002/pon.1317

Formatted: No bullets or numbering

23  
24  
25  
26 3. Satin JR, Linden W, Phillips MJ. Depression as a predictor of disease  
27  
28 progression and mortality in cancer patients: a meta-analysis. *Cancer*  
29  
30 2008;**115**:5349-5361.

Formatted: No bullets or numbering

31  
32  
33  
34 4. Mitchell AJ, Chan M, Bhatti H, et al. Prevalence of depression, anxiety,  
35  
36 and adjustment disorder in oncological, haematological, and palliative care  
37  
38 settings: a meta-analysis of 94 interview-based studies. *Lancet Oncol*  
39  
40 2011;**12**:160-174. DOI:10.1016/S1470-2045(11)70002-X

Formatted: No bullets or numbering

41  
42  
43  
44 5. Hinz A, Krauss O, Hauss JP, et al. Anxiety and depression in cancer  
45  
46 patients compared with the general population. *Eur J Cancer Care*  
47  
48 2010;**19**:522-529. DOI 10.1111/j.1365-2354.2009.01088.x

Formatted: No bullets or numbering

49  
50  
51  
52 6. Weich S, Nazroo J, Sproston K, et al. Common mental disorders and  
53  
54 ethnicity in England: the EMPIRIC study. *Psychol Med* 2004;**34**:1543-1551.

Formatted: No bullets or numbering

1  
2  
3  
4  
5  
6  
7  
8 7. Shavers VL, Brown ML. Racial and ethnic disparities in the receipt of  
9 cancer treatment. *J Natl Cancer Inst* 2002;**94**:334-57.

Formatted: No bullets or numbering

11  
12  
13  
14 8. Ward E, Jemal A, Cokkinides V, et al. Cancer disparities by race/ethnicity  
15 and socioeconomic status. *CA Cancer J Clin* 2004;**54**:78-93.

Formatted: Normal, No bullets or numbering

17  
18  
19  
20 9. Goss E, Lopez AM, Brown CL, et al. American Society of Clinical  
21 Oncology policy statement: disparities in cancer care. *J Clin Oncol*  
22 **2009**;**27**:2881-2885. DOI 10.1200/JCO.2008.21.1680

Formatted: No bullets or numbering, Adjust space between Latin and Asian text, Adjust space between Asian text and numbers

23  
24  
25  
26  
27  
28 10. US Department of Health and Human Services (2011) President's  
29 Cancer Panel: American's demographic and cultural transformations:  
30 Implications for cancer Washington DC 1-100

Formatted: No bullets or numbering

31  
32  
33  
34  
35  
36 11. All party parliamentary group on cancer (2009) Report of the all party  
37 parliamentary group of cancer's enquiry into inequalities in cancer available at  
38 [www.appg-cancer.uk](http://www.appg-cancer.uk)

Formatted: No bullets or numbering

39  
40  
41  
42  
43 12. Department of Health (2007), Cancer Reform Strategy available at  
44 [http://www.dh.gov.uk/prod\\_consum\\_dh/groups/dh\\_digitalassets/documents/digitalasset/dh\\_081007.pdf](http://www.dh.gov.uk/prod_consum_dh/groups/dh_digitalassets/documents/digitalasset/dh_081007.pdf), The Stationery Office, UK

Formatted: No bullets or numbering

45  
46  
47  
48  
49  
50  
51 13. Department of Health (2011) Improving outcomes a strategy for cancer  
52 via

Formatted: No bullets or numbering

1  
2  
3  
4  
5  
6 [http://www.dh.gov.uk/prod\\_consum\\_dh/groups/dh\\_digitalassets/documents/digitalasset/dh\\_123394.pdf](http://www.dh.gov.uk/prod_consum_dh/groups/dh_digitalassets/documents/digitalasset/dh_123394.pdf), Department of Health, London

11  
12 14.— Department of Health and Human Services (USA) (2011), HHS Action  
13 plan to reduce racial and ethnic health disparities available via  
14 [http://minorityhealth.hhs.gov/npa/files/Plans/HHS/HHS\\_Plan\\_complete.pdf](http://minorityhealth.hhs.gov/npa/files/Plans/HHS/HHS_Plan_complete.pdf),  
15 Department of Health and Human Services, Washington DC

16  
17  
18 15.— Roy R, Symonds RP, Kumar DM, et al. The use of denial in an ethnically  
19 diverse British cancer population: a cross-sectional study. *Br J Cancer*  
20 2005;**92**:1393-1397. doi:10.1038/sj.bjc.6602523

21  
22  
23 16.— Lockett T, Butow PN, King MT, et al. A review and recommendations for  
24 optimal outcome measures of anxiety, depression and general distress in  
25 studies evaluating psychosocial interventions for English-speaking adults with  
26 heterogeneous cancer diagnoses. *Support Care Cancer* 2010;**18**:1241-1262.  
27 DOI 10.1007/s00520-010-0932-8

28  
29  
30 17.— Carlson LE, Groff SL, Maciejewski O, et al. Screening for distress in lung  
31 and breast cancer outpatients: a randomized-controlled trial. *J Clin Oncol*  
32 2010;**28**:4884-4891. DOI 0.1200/JCO.2009.27.3698

33  
34  
35 18.— Zigmond AS, Snaith RP. The hospital anxiety and depression scale. *Acta*  
36 *Psychiatr Scand* 1983;**67**:361-370.

Formatted: No bullets or numbering

1  
2  
3  
4  
5  
6 19.— Mitchell AJ, Baker Glenn EA, Park B, et al. Can the Distress  
7  
8 Thermometer be improved by additional mood domains? Part II. What is the  
9  
10 optimal combination of Emotion Thermometers? *Psycho-oncology* 2010;**19**:134-  
11  
12 140. DOI 10.1002/pon.1557  
13

Formatted: No bullets or numbering

14  
15  
16 20.— Roth AJ, Kornblith AB, Batel-Copel L, et al. Rapid screening for  
17  
18 psychologic distress in men with prostate carcinoma: a pilot study. *Cancer*  
19  
20 1998;**82**:1904-1908.  
21

Formatted: No bullets or numbering

22  
23  
24 21.— Brislin RW. Back translation for cross-cultural research. *Journal of Cross-*  
25  
26 *cultural Psychology* 1970;**1**:185-216. doi: 10.1177/135910457000100304  
27

Formatted: No bullets or numbering

28  
29  
30 22.— Kochhar PH, Rajadhyaksha SS, Suvarna VR. Translation and validation  
31  
32 of brief patient health questionnaire against DSM-IV as a tool to diagnose major  
33  
34 depressive disorder in Indian patients. *J Postgrad Med* 2007;**53**:102-107.  
35

Formatted: No bullets or numbering

36  
37  
38 23.— Watson M, Law M, Dossantos M, et al. The Mini-Mac: Further  
39  
40 development of the mental adjustment to cancer scale. *J Psychosoc Oncol*  
41  
42 1994;**12**:33-46.  
43

Formatted: No bullets or numbering

44  
45  
46 24.— Broadbent E, Petrie KJ, Main J, et al. The brief illness perception  
47  
48 questionnaire. *J Psychosom Res* 2006;**60**:631-637. DOI  
49  
50 10.1016/j.jpsychores.2005.10.020  
51

Formatted: No bullets or numbering

1  
2  
3  
4  
5  
6 25.— Lord K, Ibrahim K, Kumar S, et al. Measuring trust in healthcare  
7 professionals a study of ethnically diverse UK cancer patients. *Clin Oncol*  
8 *2012;24*:13-21. DOI: 10.1016/j.clon.2011.05.010  
9  
10  
11  
12

Formatted: No bullets or numbering

13  
14 26.— National Institute for Health and Clinical Excellence (NICE) 2011,  
15 February 2010 last update, Clinical knowledge summaries (CKS) clinical topics.  
16 Depression; Available via  
17 [http://www.cks.nhs.uk/depression/management/scenario\\_bereavement/view\\_full](http://www.cks.nhs.uk/depression/management/scenario_bereavement/view_full_scenario#_402794)  
18 [scenario#\\_402794](http://www.cks.nhs.uk/depression/management/scenario_bereavement/view_full_scenario#_402794) [2012, 26/6].  
19  
20  
21  
22  
23

Formatted: No bullets or numbering

24  
25  
26 27.— King M, Nazareth I, Levy G, et al. Prevalence of common mental  
27 disorders in general practice attendees across Europe. *Br J Psychiatry*  
28 *2008;192*:362-367. DOI 10.1192/bjp.bp.107.039966  
29  
30  
31  
32

Formatted: No bullets or numbering

33  
34 28.— Ashing-Giwa KT, Tejero JS, Kim J, et al. Examining predictive models of  
35 HRQOL in a population-based, multiethnic sample of women with breast  
36 carcinoma. *Qual Life Res* 2007;*16*:413-428. DOI 10.1007/s11136-006-9138-4  
37  
38  
39  
40

Formatted: No bullets or numbering

41 29.— Eli K, Sanchez K, Vourlekis B, et al. Depression, correlates of depression  
42 and receipt of depression care among low-income women with breast or  
43 gynecologic cancer. *J Clin Oncol* 2005;*23*:3052-3060. DOI  
44 [10.1200/JCO.2005.08.041](https://doi.org/10.1200/JCO.2005.08.041)  
45  
46  
47  
48  
49  
50  
51  
52  
53  
54  
55

Formatted: No bullets or numbering

1  
2  
3  
4  
5  
6 30.—Lord K, Mitchell AJ, Ibrahim K, et al. The beliefs and knowledge of  
7 patients newly diagnosed with cancer in a UK ethnically diverse population. *Clin*  
8 *Oncol* 2012;**24**:4-12. DOI 10.1016/j.clon.2011.05.008  
9  
10  
11

Formatted: No bullets or numbering

12  
13  
14 31.—Osborne RH, Elsworth GR, Hopper JL. Age-specific norms and  
15 determinants of anxiety and depression in 731 women with breast cancer  
16 recruited through a population based cancer registry. *Eur J Cancer*  
17 *2003*;**39**:755-762.  
18  
19  
20  
21

Formatted: No bullets or numbering

22  
23  
24 32.—Akechi T, Okuyama T, Sugawara Y, et al. Major depression, adjustment  
25 disorders, and post-traumatic stress disorder in terminally ill cancer patients:  
26 associated and predictive factors. *J Clin Oncol* 2004;**22**:1957-1965. DOI  
27 10.1200/JCO.2004.08.149  
28  
29  
30  
31

Formatted: No bullets or numbering

32  
33  
34 33.—Schou I, Ekeberg O, Ruland CM, et al. Pessimism as a predictor of  
35 emotional morbidity one year following breast cancer surgery. *Psychooncology*  
36 *2004*;**13**:309-320. DOI 10.1002/pon.747  
37  
38  
39  
40

Formatted: No bullets or numbering

41  
42 34.—Brothers BM, Andersen BL. Hopelessness as a predictor of depressive  
43 symptoms for breast cancer patients coping with recurrence. *Psycho-oncology*  
44 *2009*;**18**:267-275. DOI 10.1002/pon.1394  
45  
46  
47  
48

Formatted: No bullets or numbering

49  
50 35.—Lo C, Zimmermann C, Rydall A, et al. Longitudinal Study of Depressive  
51 Symptoms in Patients with Metastatic Gastrointestinal and Lung Cancer. *J Clin*  
52 *Oncol* 2010;**28**:3084. DOI 10.1200/JCO.2009.26.9712  
53  
54

Formatted: No bullets or numbering

36. Grassi L, Travado L, Gil F, et al. Hopelessness and related variables among cancer patients in the Southern European Psycho-Oncology Study (SEPOS). *Psychosomatics* 2010;**51**:201-207. DOI 10.1176/appi.psy.51.3.201

Formatted: No bullets or numbering

37. Johansson M, Ryden A, Finizia C. Mental adjustment to cancer and its relation to anxiety, depression, HRQL and survival in patients with laryngeal cancer—A longitudinal study. *BMC Cancer* 2011;**11**:283. DOI 10.1186/1471-2407-11-283

Formatted: No bullets or numbering

38. Chaturvedi SK, Chandra PS, Channabasavanna SM, et al. Levels of anxiety and depression in patients receiving radiotherapy in India. *Psychooncology* 1996;**5**:343-346. DOI: 10.1002/(SICI)1099-1611(199612)

Formatted: No bullets or numbering

39. Kishore J, Ahmad I, Kaur R, PKM. Beliefs and perceptions about cancers among patients attending radiotherapy OPD in Delhi, India. *Asian Pac J Cancer Prev* 2008;**9**:155-158.

Formatted: No bullets or numbering

40. Szczepura A, Price C, Gumber A. Breast and bowel cancer screening uptake patterns over 15 years for UK South-Asian ethnic minority populations corrected for differences in socio-demographic characteristics. *BMC Public Health* 2008;**8**:346.

Formatted: Indent: Left: 0", First line: 0"

Formatted: No bullets or numbering

41. Miles A, Rainbow S, von Wagner C. Cancer Fatalism and Poor Self-Rated Health Mediate the Association between Socioeconomic Status and

Formatted: Adjust space between Latin and Asian text, Adjust space between Asian text and numbers

Formatted: No bullets or numbering



1  
2  
3  
4  
5  
6  
7  
8  
9  
10  
11  
12  
13  
14  
15  
16  
17  
18  
19  
20  
21  
22  
23  
24  
25  
26  
27  
28  
29  
30  
31  
32  
33  
34  
35  
36  
37  
38  
39  
40  
41  
42  
43  
44  
45  
46  
47  
48  
49  
50  
51  
52  
53  
54  
55  
56  
57  
58  
59  
60

~~Uptake of Colorectal Cancer Screening in England. *Cancer Epidemiol Biomarkers Prev* 2011;**20**:2132-2140. DOI 10.1158/1055-9965.EPI-11-0453~~

42. ~~Muthu Kumar D, Symonds RP, Sundar S, et al. Information needs of Asian and White British cancer patients and their families in Leicestershire: a cross-sectional survey. *Br J Cancer* 2004;**90**:1474-1478. doi:10.1038/sj.bjc.6601774~~

Formatted: No bullets or numbering

Formatted: Indent: Left: 0", First line: 0"

**Fig 1a-1d: Longitudinal comparison of depressive symptoms in BSA and BW patients**

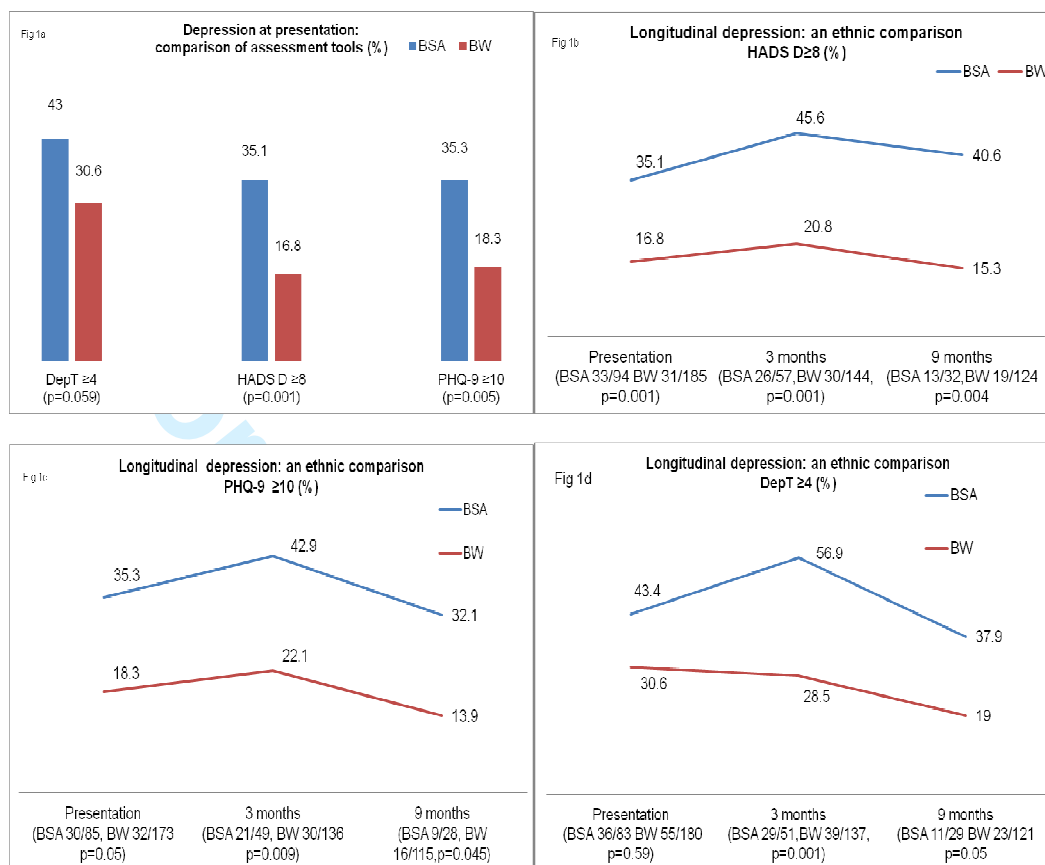

Fig 2a-g Longitudinal ethnic differences in coping strategies

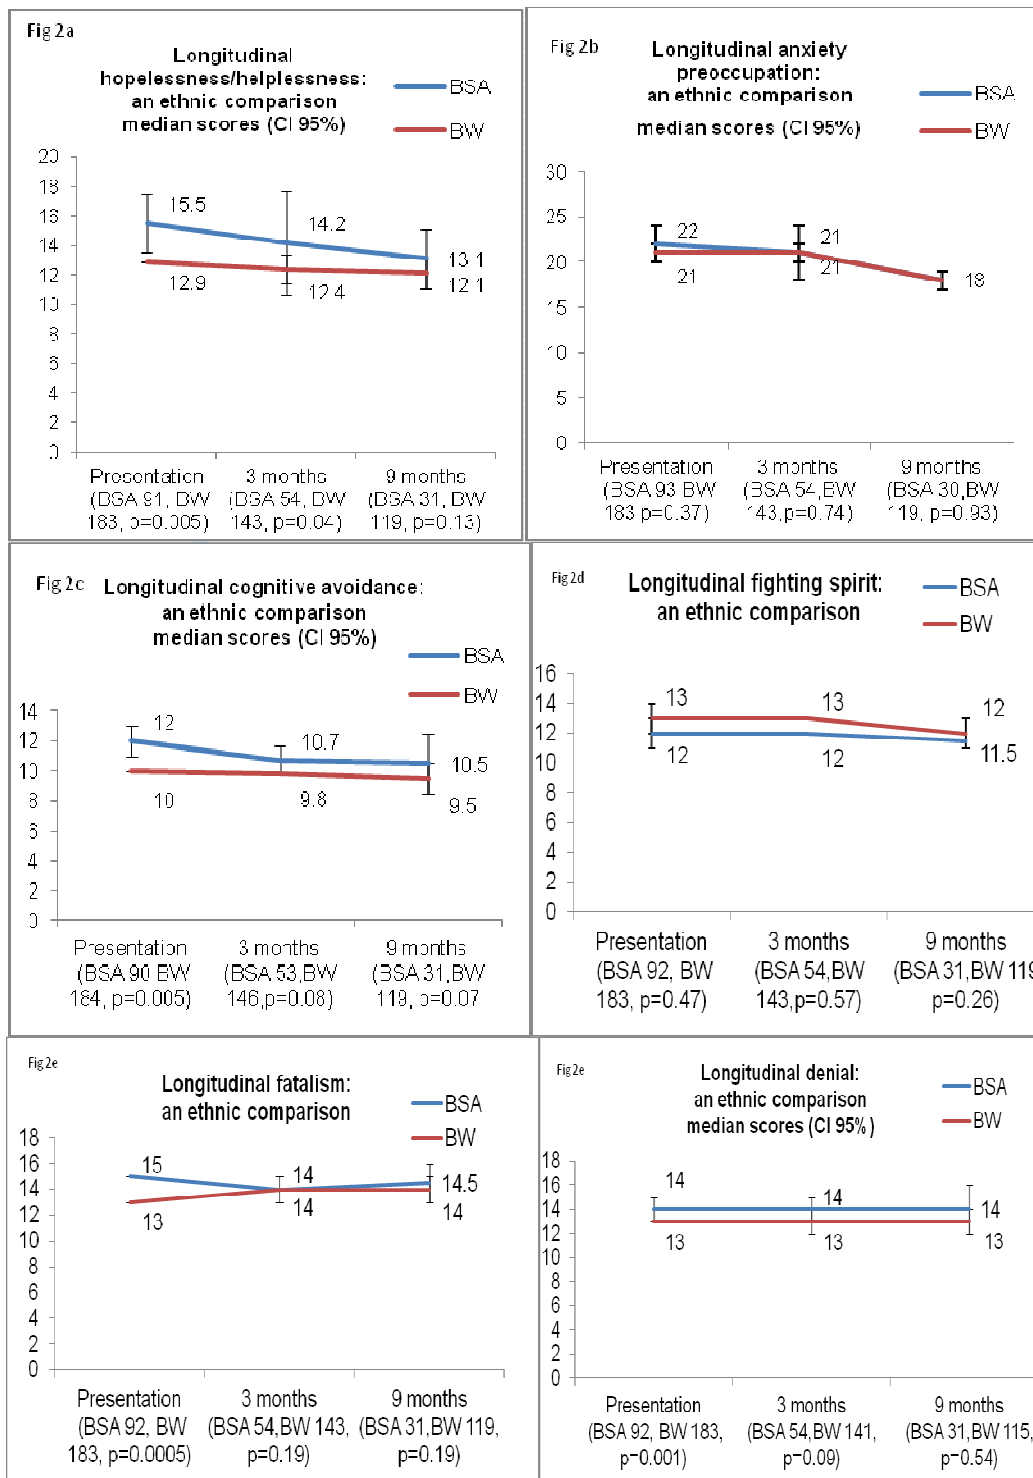

Note: 95% CI was zero for some median scores

Fig 2a-g Longitudinal ethnic differences in coping strategies

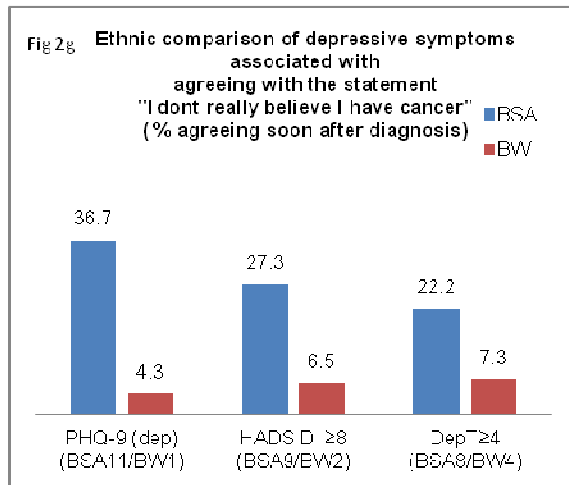

**Supp. Table 1: Longitudinal associations between treatment intent and depression**

| HADS-D<br>7v8 |          |            | n=  | ≤7  | %    | ≥8 | %    | p value |
|---------------|----------|------------|-----|-----|------|----|------|---------|
|               | Baseline | Radical    | 188 | 151 | 80.3 | 37 | 19.7 |         |
|               |          | Palliative | 91  | 64  | 70.3 | 27 | 29.7 | 0.088   |
|               | 3 months | Radical    | 136 | 96  | 70.6 | 40 | 29.4 |         |
|               |          | Palliative | 65  | 49  | 75.4 | 16 | 24.6 | 0.588   |
|               | 9 months | Radical    | 111 | 88  | 79.3 | 23 | 20.7 |         |
|               |          | Palliative | 45  | 36  | 80   | 9  | 20   | 1.0     |

Suppl. Table 2: Ethnic differences in depressive symptoms

| Mann Whitney U Test    |           |     | n=  | Mean Rank Score | Md(IQR)   | U      | Z      | r     | Sig.   |
|------------------------|-----------|-----|-----|-----------------|-----------|--------|--------|-------|--------|
| PHQ-9                  | Baseline. | BSA | 85  | 156.95          | 7(3:12)   |        |        |       |        |
|                        |           | BW  | 173 | 116.01          | 4(2:8)    | 5019   | -4.158 | -0.29 | 0.0005 |
|                        | 3months   | BSA | 49  | 112.64          | 9(5:12)   |        |        |       |        |
|                        |           | BW  | 136 | 85.92           | 5(2:8)    | 2369   | -3.003 | 0-.22 | 0.003  |
|                        | 9 months  | BSA | 28  | 84.32           | 4 (2:10)  |        |        |       |        |
|                        |           | BW  | 115 | 69.00           | 3(1:7.5)  | 1265   | -1.767 | -0.14 | 0.077  |
| HADS-D                 | Baseline  | BSA | 94  | 166.43          | 5(2:10)   |        |        |       |        |
|                        |           | BW  | 185 | 126.57          | 3(1:6)    | 6211   | -3.919 | -0.23 | 0.0005 |
|                        | 3months   | BSA | 57  | 125.31          | 6.5(4:10) |        |        |       |        |
|                        |           | BW  | 144 | 91.38           | 4(2:7)    | 2718.5 | -3.742 | -0.26 | 0.0005 |
|                        | 9 months  | BSA | 32  | 98.47           | 6(2:9)    |        |        |       |        |
|                        |           | BW  | 124 | 73.35           | 3(1:7.5)  | 1345   | -2.825 | -0.25 | 0.005  |
| Depression Thermometer | Baseline  | BSA | 84  | 147.51          | 3(0:6)    |        |        |       |        |
|                        |           | BW  | 180 | 125.50          | 1(0:4)    | 6299.5 | -2.249 | -0.13 | 0.024  |
|                        | 3months   | BSA | 51  | 119.72          | 4.5(1:6)  |        |        |       |        |
|                        |           | BW  | 138 | 85.87           | 1(0:3)    | 2258.5 | -3.877 | -0.30 | 0.0005 |
|                        | 9 months  | BSA | 30  | 90.35           | 1(0:5)    |        |        |       |        |
|                        |           | BW  | 120 | 71.85           | 0(0:2)    | 1354.5 | -2.237 | -0.18 | 0.025  |

1  
2  
3  
4  
5  
6  
7  
8  
9  
10  
11  
12  
13  
14  
15  
16  
17  
18  
19  
20  
21  
22  
23  
24  
25  
26  
27  
28  
29  
30  
31  
32  
33  
34  
35  
36  
37  
38  
39  
40  
41  
42  
43  
44  
45  
46  
47  
48  
49

**Suppl. Table 3: Longitudinal associations between coping strategies and depression (HADS D)**

| Mann Whitney U Test HADS D 7v8 |                    |          | n=  | Mean Rank Score | Median (IQR)  | U         | Z      | r    | p-value |
|--------------------------------|--------------------|----------|-----|-----------------|---------------|-----------|--------|------|---------|
| H/H                            | Baseline           | ND       | 211 | 119.09          | 12(10:15)     |           |        |      |         |
|                                |                    | D        | 63  | 199.17          | 17.5(14:21.5) | 2761.5    | -7.065 | 0.42 | 0.0005  |
|                                | 3m                 | ND       | 145 | 83.79           | 11(9:15.5)    |           |        |      |         |
|                                |                    | D        | 52  | 141.41          | 16.5(11:19)   | 1564.5    | -6.303 | 0.4  | 0.0005  |
|                                | 9m                 | ND       | 117 | 65.87           | 11(9:15)      |           |        |      |         |
|                                |                    | D        | 31  | 107.08          | 16(14:18)     | 803.5     | -4.802 | 0.39 | 0.0005  |
|                                | Cog. Avoidance     | Baseline | ND  | 210             | 128.22        | 10(9:12)  |        |      |         |
|                                |                    | D        | 62  | 164.56          | 11(10:13)     | 4770.5    | -3.227 | 0.19 | 0.001   |
|                                | 3m                 | ND       | 144 | 95.41           | 10(8:12)      |           |        |      |         |
|                                |                    | D        | 52  | 107.05          | 11(10:13)     | 3299.5    | -1.278 | 0.09 | 0.201   |
|                                | 9m                 | ND       | 117 | 71.86           | 10(8:12)      |           |        |      |         |
|                                |                    | D        | 31  | 84.45           | 11(9:12)      | 1505      | -1.464 | 0.12 | 0.143   |
| Fatalism                       | Baseline           | ND       | 211 | 132.59          | 14(12:16)     |           |        |      |         |
|                                |                    | D        | 64  | 155.85          | 15.5(13:17)   | 5609.5    | -2.062 | 0.12 | 0.039   |
|                                | 3m                 | ND       | 145 | 96.07           | 14(12:15)     |           |        |      |         |
|                                |                    | D        | 52  | 107.16          | 14(13:17)     | 3345.5    | -1.211 | 0.08 | 0.226   |
|                                | 9m                 | ND       | 117 | 73.19           | 14(12:15)     |           |        |      |         |
|                                |                    | D        | 30  | 77.17           | 14(13:16)     | 1660      | -.459  | 0.03 | 0.646   |
|                                | Anx. Preoccupation | Baseline | ND  | 212             | 121.09        | 20(17:23) |        |      |         |
|                                |                    | D        | 64  | 196.18          | 25(22.5:27.5) | 3092.5    | -6.610 | 0.39 | 0.0005  |
|                                | 3m                 | ND       | 145 | 83.76           | 18(15:20.5)   |           |        |      |         |
|                                |                    | D        | 52  | 141.41          | 24(22:26)     | 1559.5    | -6.278 | 0.44 | 0.0005  |
|                                | 9m                 | ND       | 117 | 76.65           | 18(15:21)     |           |        |      |         |
|                                |                    | D        | 30  | 103.08          | 23(18:26)     | 882.5     | -4.203 | 0.34 | 0.0005  |

|                 |          |    |     |        |              |        |        |      |       |
|-----------------|----------|----|-----|--------|--------------|--------|--------|------|-------|
| Fighting Spirit | Baseline | ND | 212 | 138.95 | 13(12:14)    |        |        |      |       |
|                 |          | D  | 63  | 134.80 | 13(11:14)    | 6476.5 | -.368  | 0.02 | 0.713 |
|                 | 3m       | ND | 145 | 104.56 | 13(10:14)    |        |        |      |       |
|                 |          | D  | 52  | 83.51  | 12(11:13)    | 2964.5 | -2.309 | 0.16 | 0.021 |
|                 | 9m       | ND | 117 | 76.65  | 12(11:14)    |        |        |      |       |
|                 |          | D  | 31  | 66.40  | 12(10:13)    | 1562.5 | -1.192 | 0.09 | 0.233 |
| Denial          | Baseline | ND | 211 | 138.33 | 13 (12:15)   |        |        |      |       |
|                 |          | D  | 64  | 136.90 | 14 (12:16)   | 6681.5 | -.127  | 0.07 | 0.899 |
|                 | 3m       | ND | 141 | 94.36  | 13(11.50:15) |        |        |      |       |
|                 |          | D  | 54  | 107.5  | 14(11:16)    | 3294   | -1.466 | 0.10 | 0.143 |
|                 | 9m       | ND | 114 | 75.29  | 13(12:16)    |        |        |      |       |
|                 |          | D  | 30  | 61.92  | 13(10:14)    | 1392.5 | -1.573 | 0.13 | 0.116 |

D= depressive symptoms HADS ≤7

ND = depressive symptoms HADS ≥8



1  
2  
3  
4  
5  
6  
7  
8  
9  
10  
11  
12  
13  
14  
15  
16  
17  
18  
19  
20  
21  
22  
23  
24  
25  
26  
27  
28  
29  
30  
31  
32  
33  
34  
35  
36  
37  
38  
39  
40  
41  
42  
43  
44  
45  
46  
47  
48  
49

Suppl. Table 4: Longitudinal associations between coping strategies and depression via PHQ-9

| Mann Whitney U Test (PHQ-9 9v10) |          |    | n=     | Mean Rank Score (MRS) | Median (IQR) | U      | Z      | r      | p-value |
|----------------------------------|----------|----|--------|-----------------------|--------------|--------|--------|--------|---------|
| Hopelessness /Helplessness       | Baseline | ND | 193    | 112.38                | 12(10:15.5)  |        |        |        |         |
|                                  |          | D  | 62     | 176.61                | 17(13:21)    | 2969   | -5.987 | 0.37   | 0.0005  |
|                                  | 3months  | ND | 134    | 76.02                 | 11(8:14)     |        |        |        |         |
|                                  |          | D  | 49     | 135.69                | 17(16:19)    | 1142   | -6.808 | 0.5    | 0.0005  |
|                                  | 9months  | ND | 116    | 63.98                 | 11(9:15.5)   |        |        |        |         |
|                                  | D        | 23 | 100.37 | 16.5(11:19)           | 635.5        | -3.998 | 0.34   | 0.0005 |         |
| Cognitive Avoidance              | Baseline | ND | 192    | 120.03                | 10(9:12)     |        |        |        |         |
|                                  |          | D  | 61     | 148.93                | 11(10:13)    | 4518.5 | -2.712 | 0.16   | 0.007   |
|                                  | 3months  | ND | 134    | 90.10                 | 10(8:12)     |        |        |        |         |
|                                  |          | D  | 49     | 97.20                 | 11(10:12)    | 3028   | -.810  | 0.06   | 0.418   |
|                                  | 9months  | ND | 116    | 67.15                 | 10(8:12)     |        |        |        |         |
|                                  | D        | 23 | 84.37  | 11(10:13)             | 1003.5       | -1.886 | 0.16   | 0.059  |         |
| Fatalism                         | Baseline | ND | 205    | 123.64                | 14(12:16)    |        |        |        |         |
|                                  |          | D  | 53     | 152.18                | 15(13:17)    | 4740.5 | -2.474 | 0.15   | 0.013   |
|                                  | 3months  | ND | 134    | 88.95                 | 14(12:16)    |        |        |        |         |
|                                  |          | D  | 49     | 100.35                | 14(13:16)    | 2874   | -1.297 | 0.09   | 0.15    |
|                                  | 9months  | ND | 116    | 67.81                 | 14(12:15)    |        |        |        |         |
|                                  | D        | 23 | 81.07  | 15(13:19)             | 1079.5       | -1.451 | 0.12   | 0.147  |         |
| Anx. Preoccupation.              | Baseline | ND | 194    | 113.58                | 20(17:23)    |        |        |        |         |
|                                  |          | D  | 62     | 175.19                | 24.5 (21:27) | 3119   | -5.987 | 0.37   | 0.0005  |
|                                  | 3months  | ND | 134    | 78.86                 | 19(16:23)    |        |        |        |         |
|                                  |          | D  | 49     | 127.94                | 24(21:27)    | 1522   | -5.559 | 0.4    | 0.0005  |
|                                  | 9months  | ND | 116    | 62.86                 | 18(15:20.5)  |        |        |        |         |
|                                  | D        | 23 | 106    | 24(22:26)             | 506          | -4.704 | 0.4    | 0.0005 |         |

|                 |          |    |     |        |              |        |        |       |       |
|-----------------|----------|----|-----|--------|--------------|--------|--------|-------|-------|
| Fighting Spirit | Baseline | ND | 194 | 130.87 | 13(12:14)    |        |        |       |       |
|                 |          | D  | 62  | 121.08 | 13(11:14)    | 5554   | -.916  | -0.05 | 0.359 |
|                 | 3months  | ND | 134 | 94.60  | 12(11:14)    |        |        |       |       |
|                 |          | D  | 49  | 84.90  | 12(11:13)    | 2935   | -1.109 | 0.08  | 0.268 |
|                 | 9months  | ND | 116 | 70.43  | 12(10:14)    |        |        |       |       |
|                 |          | D  | 23  | 67.85  | 13(11:13)    | 1284.5 | -.283  | 0.02  | 0.777 |
| Denial (CIDQ)   | Baseline | ND | 194 | 124.49 | 14 (12:15)   |        |        |       |       |
|                 |          | D  | 62  | 141.05 | 14.5 (12:17) | 5236   | -1.542 | -0.09 | 0.123 |
|                 | 3months  | ND | 130 | 87.52  | 13(12:15)    |        |        |       |       |
|                 |          | D  | 49  | 96.58  | 14(12:15)    | 2862.5 | -1.051 | 0.07  | 0.293 |
|                 | 9months  | ND | 114 | 68.82  | 12(11.50:15) |        |        |       |       |
|                 |          |    | 23  | 69.89  | 13(11:16)    | 1290.5 | -.119  | 0.01  | 0.905 |

ND = depressive symptoms PHQ-9  $\geq 10$

D= depressive symptoms PHQ-9  $\leq 9$

**Suppl. Table 5: Longitudinal associations between coping strategies and depressive symptoms via DepT.**

| Mann Whitney                |          |    | n=  | Mean Rank Score (MRS) | Md(IQR)     | U      | Z      | r      | p-value |
|-----------------------------|----------|----|-----|-----------------------|-------------|--------|--------|--------|---------|
| <b>DepT. 3v4</b>            |          |    |     |                       |             |        |        |        |         |
| Hopelessness / helplessness | Baseline | ND | 170 | 108.52                | 12(9:15)    |        |        |        |         |
|                             |          | D  | 92  | 173.96                | 16.5(13:19) | 3913.5 | -6.698 | 0.41   | 0.0005  |
|                             | 3months  | ND | 118 | 81.49                 | 12(9:16)    |        |        |        |         |
|                             |          | D  | 68  | 114.34                | 15(12:19)   | 2595   | -4.022 | 0.29   | 0.0005  |
| Cognitive Avoidance.        | 9months  | ND | 113 | 66.51                 | 11.5(9:15)  |        |        |        |         |
|                             |          | D  | 34  | 98.88                 | 15(12:17)   | 1075   | -3.905 | 0.32   | 0.0005  |
|                             | Baseline | ND | 169 | 120.10                | 10(8:12)    |        |        |        |         |
|                             |          | D  | 91  | 149.81                | 11(10:12)   | 5932.5 | -3.067 | 0.19   | 0.002   |
| Fatalism                    | 3months  | ND | 117 | 90.51                 | 10(9:15)    |        |        |        |         |
|                             |          | D  | 68  | 97.29                 | 11(9:12)    | 3686.5 | -.838  | 0.06   | 0.402   |
|                             | 9months  | ND | 113 | 73.92                 | 10(8:12)    |        |        |        |         |
|                             |          | D  | 34  | 74.26                 | 10(8:12)    | 1912   | -.042  | 0.0003 | 0.967   |
| Anx. Preoccupation.         | Baseline | ND | 170 | 125.88                | 14(12:16)   |        |        |        |         |
|                             |          | D  | 92  | 141.88                | 14(13:16)   | 6865   | -1.641 | 0.1    | 0.101   |
|                             | 3months  | ND | 118 | 88.49                 | 13(12:15)   |        |        |        |         |
|                             |          | D  | 68  | 102.19                | 14(12.5:16) | 3421   | -1.684 | 0.12   | 0.092   |
| Anx. Preoccupation.         | 9months  | ND | 113 | 72.94                 | 13(12:16)   |        |        |        |         |
|                             |          | D  | 34  | 77.53                 | 14(13:16)   | 1801   | -.555  | 0.04   | 0.579   |
|                             | Baseline | ND | 171 | 103.12                | 20(17:22)   |        |        |        |         |
|                             |          | D  | 92  | 185.68                | 24(22:27)   | 2927.5 | -8.412 | 0.52   | 0.0005  |
| Anx. Preoccupation.         | 3months  | ND | 119 | 75.85                 | 19(17:22)   |        |        |        |         |
|                             |          | D  | 68  | 125.76                | 24(21:27)   | 1886   | -6.079 | 0.44   | 0.0005  |
|                             | 9months  | ND | 114 | 66.54                 | 20(17:23)   |        |        |        |         |

|                 |          |    |     |        |             |        |        |       |        |
|-----------------|----------|----|-----|--------|-------------|--------|--------|-------|--------|
|                 |          | D  | 34  | 101.19 | 24(21:27)   | 1030.5 | -4.145 | 0.34  | 0.0005 |
| Fighting Spirit | Baseline | ND | 171 | 132.79 | 13(11:14)   |        |        |       |        |
|                 |          | D  | 92  | 130.53 | 13(11.5:14) | 7731   | -0.232 | 0.01  | 0.817  |
|                 | 3months  | ND | 119 | 93.64  | 13(11:14.5) |        |        |       |        |
|                 |          | D  | 68  | 94.63  | 13(11:14)   | 4003   | -.122  | 0.008 | 0.903  |
|                 | 9months  | ND | 114 | 77.39  | 13(11:15)   |        |        |       |        |
|                 |          | D  | 34  | 64.81  | 12(11:14)   | 1608.5 | -1.518 | 0.12  | 0.129  |
| Denial (CIDQ)   | Baseline | ND | 172 | 132.44 | 14(12:15)   |        |        |       |        |
|                 |          | D  | 92  | 132.61 | 13.5(12:16) | 7901.5 | -0.018 | 0.001 | 0.986  |
|                 | 3months  | ND | 119 | 90.95  | 13(12:15)   |        |        |       |        |
|                 |          | D  | 68  | 99.34  | 13(12:16)   | 3683   | -1.026 | 0.06  | 0.305  |
|                 | 9months  | ND | 115 | 76.65  | 13(12:15)   |        |        |       |        |
|                 |          | D  | 34  | 69.41  | 13(11:15)   | 1765   | -.865  | 0.07  | 0.387  |

ND= depressive symptoms DepT  $\leq$ 3

D= depressive symptoms DepT  $\geq$ 4



**Are depressive symptoms more common among British South Asian compared to British White cancer patients?: a cross sectional survey.**

|                                    |                                                                                                                                                                                                                                                                                                                                                                                                                                                                        |
|------------------------------------|------------------------------------------------------------------------------------------------------------------------------------------------------------------------------------------------------------------------------------------------------------------------------------------------------------------------------------------------------------------------------------------------------------------------------------------------------------------------|
| Journal:                           | <i>BMJ Open</i>                                                                                                                                                                                                                                                                                                                                                                                                                                                        |
| Manuscript ID:                     | bmjopen-2013-002650.R2                                                                                                                                                                                                                                                                                                                                                                                                                                                 |
| Article Type:                      | Research                                                                                                                                                                                                                                                                                                                                                                                                                                                               |
| Date Submitted by the Author:      | 08-May-2013                                                                                                                                                                                                                                                                                                                                                                                                                                                            |
| Complete List of Authors:          | Lord, Karen; University Hospitals of Leicester NHS Trust, Oncology<br>Ibrahim, Kausher; University Hospitals of Leicester NHS Trust, Oncology<br>Kumar, Sawan; University Hospitals of Leicester NHS Trust, Oncology<br>Mitchell, Alex; University of Leicester, Cancer Studies and Molecular<br>Medicine<br>Rudd, Nicky; University Hospitals of Leicester NHS Trust, Oncology<br>Symonds, Raymond; University of Leicester, Cancer Studies and Molecular<br>Medicine |
| <b>Primary Subject<br>Heading</b>: | Oncology                                                                                                                                                                                                                                                                                                                                                                                                                                                               |
| Secondary Subject Heading:         | Mental health, Palliative care                                                                                                                                                                                                                                                                                                                                                                                                                                         |
| Keywords:                          | MENTAL HEALTH, Adult oncology < ONCOLOGY, Adult palliative care < PALLIATIVE CARE, Ethnicity, Depression                                                                                                                                                                                                                                                                                                                                                               |
|                                    |                                                                                                                                                                                                                                                                                                                                                                                                                                                                        |

SCHOLARONE™  
Manuscripts

Only

1  
2  
3  
4  
5  
6 **Are depressive symptoms more common among British**  
7  
8  
9 **South Asian compared to British White cancer**  
10  
11 **patients? a cross sectional survey**  
12  
13

14  
15  
16  
17 Karen Lord<sup>1</sup>, Kausher Ibrahim<sup>1</sup>, Sawan Kumar<sup>1</sup>, Alex J. Mitchell<sup>1,2</sup>, Nicky Rudd<sup>1</sup>,  
18  
19 R Paul. Symonds<sup>2</sup>  
20  
21

22  
23  
24 <sup>1</sup>Department of Oncology, University Hospitals of Leicester NHS Trust,  
25  
26 Leicester Royal Infirmary, Leicester LE1 5WW UK  
27  
28

29  
30 <sup>2</sup>Department of Cancer Studies and Molecular Medicine, University of Leicester,  
31  
32 Osborne Building, Leicester, Leicester Royal Infirmary LE1 5WW UK  
33  
34  
35  
36  
37  
38

39 Corresponding author –  
40

41 R Paul Symonds  
42 University of Leicester  
43 Department of Cancer Studies & Molecular Medicine  
44 Osborne Building  
45 Leicester Royal Infirmary  
46 Leicester  
47 LE1 5WW  
48 UK  
49 Email rps8@le.ac.uk  
50 Tel 0116 258 6294  
51 Fax 0116 258 7599  
52  
53  
54

55  
56 **Key words** Cancer, ethnicity, South Asian, anxiety, depression  
57

58 **Word count** 4475  
59  
60

## **Abstract**

### **Objectives**

This cross sectional survey investigated whether there were ethnic differences in depressive symptoms among British South Asian (BSA) cancer patients compared to British White (BW) patients during nine months following presentation at a UK Cancer Centre. We examined associations between depressed mood, coping strategies and the burden of symptoms.

### **Design**

Questionnaires were administered to 94 BSA and 185 BW recently diagnosed cancer patients at baseline and at three and nine months. 53.8% of the BSA sample were born in the Indian subcontinent, 33% in Africa and 12.9% in the UK. Three screening tools for depression were used to counter concerns about ethnic bias and validity in linguistic translation. The Hospital Anxiety and Depression Scale (HADS-D), Patient Health Questionnaire (PHQ9) (both validated in Gujarati), Emotion Thermometers (ET) (including the Distress Thermometer (DT), Mini-MAC and the newly developed Cancer Insight and Denial questionnaire were completed.

### **Setting**

Leicestershire Cancer Centre, UK.

### **Participants**

94 BSA and 185 BW recently diagnosed cancer patients.

### **Results**

BSA self reported significantly higher rates of depressive symptoms compared to BW patients longitudinally (HADS-D $\geq$ 8: baseline: BSA 35.1% v BW 16.8%,

1  
2  
3 p=0.001; 3 months BSA 45.6% v BW 20.8%, p=0.001; 9 months BSA 40.6% v  
4  
5 BW 15.3%, p=0.004). BSA patients used potentially maladaptive coping  
6  
7 strategies more frequently than BW patients at baseline  
8  
9 (hopelessness/helplessness p=0.005, fatalism p=0.0005, avoidance p=0.005;  
10  
11 the CIDQ denial statement 'I do not really believe I have cancer' p=0.0005).  
12  
13 BSA patients experienced more physical symptoms (DT checklist) which  
14  
15 correlated with ethnic differences in depressive symptoms especially at three  
16  
17 months.  
18  
19

### 20 **Conclusion**

21  
22 Health professionals need to be aware of a greater probability of depressive  
23  
24 symptomatology (including somatic symptoms) and how this may present  
25  
26 clinically in the first nine months after diagnosis if this ethnic disparity in mental  
27  
28 wellbeing is to be addressed.  
29  
30  
31  
32  
33  
34  
35  
36  
37  
38  
39  
40  
41  
42  
43  
44  
45  
46  
47  
48  
49  
50  
51  
52  
53  
54  
55  
56  
57  
58  
59  
60



## Article summary

### Article Focus

- We investigated whether there were differences in depressive symptoms among British South Asian (BSA) cancer patients compared to British White (BW) patients over a nine month period.
- To limit cultural bias we used multiple questionnaires including HADS-D and a version of the PHQ-9 developed for India.
- We considered how coping strategies were used and whether physical symptoms affected mood.

### Key Messages

- BSA had twice the self-reported rate of depressive symptoms than BW patients and five times the incidence of severe depression.
- Differences persist for nine months after baseline assessment.
- BSA patients used potentially maladaptive coping strategies far more than BW patients at baseline assessment.
- BSA patients appear to experience a heavier physical symptom burden than BW patients.

### Strengths and Limitations

- This is the first comparison of how BSA and BW patients cope with cancer.
- We have used multiple assessment tools.
- We have demonstrated highly statistically significant differences in the rate of depressive symptoms between the two groups and marked differences in coping style.

- BSA clinical staff were involved in the study. In spite of this we had difficulty recruiting and retaining BSA patients, especially by nine months.
- Any variations in mood which may have occurred between the three data collection points are not represented.
- It is likely that the rates of depressive symptoms are under-reported since anecdotally those who were most distressed often did not feel able to participate in this study.
- Self-reported questionnaires indicate the presence of depressive symptoms but given the absence of psychiatric interviews this is not diagnostic of a depressive disorder.

## **Introduction**

Depression is one of the strongest determinants of health related quality of life and it can influence medical care and participation in treatment.[1, 2] It may also be linked with other serious outcomes including mortality.[3] The point prevalence of major depression at any time in the first two years following a cancer diagnosis is 14.9% by DSMIV criteria.[4] This is two to four times that observed in the general population using equivalent criteria.[5] An under researched area is the incidence of depression in ethnic minority patients.

Some research suggests that UK ethnic minorities may be more vulnerable to mental illness within the general population than the majority host population[6] leaving the largely unproven impression that they also suffer more distress when diagnosed with cancer. However ethnic minorities may be less likely to receive high quality care.[7, 8] Inequalities in access to care, receipt of treatment and mortality are particularly striking among ethnic minorities, the elderly and those with mental ill health in both the UK [9, 10, 11] and the USA [12, 13, 14] where it is a governmental aspiration to remove such disparities.

People originating from the Indian Sub Continent account for the largest ethnic minority group in England and Wales (total population 56.1 million). Specifically those classified as Indian are in the majority accounting for 1,412,958, Pakistani 1,124,511 and Bangladeshi 447,201.[15] Most of the Indians born in Africa either sought sanctuary from or were expelled by leaders such as Idi Amin in East African states.

1  
2  
3 The city of Leicester has one of the highest concentrations of this population  
4 (total population: 329,836: Indian 93,000, Pakistani, 8,000, Bangladeshi, 3,600)  
5  
6  
7 which contrast with the surrounding county (total population: 650,489: Indian  
8  
9  
10 54,000, Pakistani, 2,100, Bangladeshi, 2,300).[15] We define 'British South  
11  
12 Asian (BSA)' as a person whose ancestry originates in the Indian subcontinent,  
13  
14 and who identifies with, or is identified with, their host country [16]. A previous  
15  
16 pilot study showed a significantly higher incidence in symptoms of depression  
17  
18 among BSA patients in Leicester and the local county compared to British White  
19  
20 (BW) patients via HADS-D  $\geq 10$  (BSA 20.7%; BW 10.4%  $p=0.001$ ).[17]  
21  
22  
23 Depressive symptoms were associated with potentially maladaptive coping  
24  
25 strategies among both ethnic groups but were employed statistically significantly  
26  
27 more frequently by BSA patients. For example, fatalism  $p=0.0001$ ; denial  
28  
29  $p=0.019$ ; hopelessness and helplessness,  $p=0.007$ .  
30  
31  
32  
33

34 The findings of our pilot study [17] were consistent with the few publications  
35  
36 reporting the incidence of depression or distress in ethnic minority cancer  
37  
38 patients. The largest is a meta-analysis of 21 papers which found that US  
39  
40 Hispanic patients were significantly more distressed ( $p=0.0001$ ) and depressed  
41  
42 ( $p=0.04$ ) than the majority population. [18]  
43  
44  
45  
46

47 Similar findings were reported from Canada with more distress amongst ethnic  
48  
49 minorities (E and SE Asia, South Asian, First Nation) compared to the majority  
50  
51 population (European, Canadian, British  $p=0.0001$ ). Greater distress was also  
52  
53 found among those with lower income ( $p=0.001$ ).[19]  
54  
55  
56  
57  
58  
59  
60

1  
2  
3 Our study addressed how the UK's largest ethnic minority population (BSA)  
4  
5 coped with cancer, compared with the host population, by analysing data from a  
6  
7 sample of those attending the Leicestershire Cancer Centre.  
8  
9

10  
11  
12 Feeling distressed or low in mood are initial emotional responses to a diagnosis  
13  
14 of cancer, and is part of normal adjustment, if of short duration. If, however  
15  
16 distress persists it can have a harmful effect on the mental wellbeing of the  
17  
18 individual risking depressive symptoms [17, 20] and a reduction in their quality  
19  
20 of life.[21, 22, 23]  
21  
22

23  
24  
25 This study was designed in reference to the Transactional Model of Stress and  
26  
27 Coping which requires an assessment of personality traits within the context of  
28  
29 the individual's environment.[24] For cancer patients this environment includes  
30  
31 beliefs about cancer, level of social support, proficiency in host languages, level  
32  
33 of literacy, degree of disability, co-morbidities, spiritual beliefs, cultural  
34  
35 background and economic circumstances.[25]  
36  
37  
38  
39

40  
41 The symptom burden on cancer patients can have a close interrelationship with  
42  
43 psychological wellbeing. Fatigue and 'disabilities' independently predicted  
44  
45 depression among lung cancer patients commencing treatment [26] and have  
46  
47 been observed in pre-chemotherapy patients with curative cancer.[27] A high  
48  
49 symptom burden can persist over time. One in four patients (n=4903) had a  
50  
51 high symptom burden one year post diagnosis with depression, fatigue and pain  
52  
53 having the greatest impact on their quality of life.[28] Similarly a high symptom  
54  
55 burden at 12 months was reported among patients referred for control of pain  
56  
57  
58  
59  
60

1  
2  
3 and depression (n=405).[29] Among Chinese breast cancer patients (n=285)  
4  
5 less distress from physical symptoms immediately after surgery predicted  
6  
7 psychological resilience. The study suggested that ineffective symptom control  
8  
9 during treatment increased a women's risk of persistent psychological distress  
10  
11 longitudinally. The value of pre-operative interventions was highlighted.[30]  
12  
13

14  
15  
16 Of particular concern are reports of a higher symptom burden among ethnic  
17  
18 minorities, for example among Hispanic women post-chemotherapy for breast  
19  
20 cancer.[31] A greater 'unmet need' for symptom control was implicated among  
21  
22 Black and Spanish speaking Hispanic women with breast cancer than White  
23  
24 women.[32]  
25  
26

27  
28  
29 We report the longitudinal incidence of depressive symptoms among a sample  
30  
31 of BSA and BW patients. Selected demographics, coping styles and the burden  
32  
33 of patient problems were examined to determine if they were associated with  
34  
35 depressive symptoms.  
36  
37

### 38 39 40 **Hypotheses**

41  
42 On the basis of our literature review and pilot studies we hypothesized that  
43  
44 more BSA cancer patients would self report depressive symptoms than BW  
45  
46 patients over time. We further hypothesized that both a greater use of  
47  
48 potentially maladaptive coping strategies and a heavier symptom burden, would  
49  
50 reflect higher rates of depressive symptoms.  
51  
52

### 53 54 55 **Methods**

## Study procedures

279 patients, who were aware they had cancer, were recruited at the Leicestershire Cancer Centre between September 2007 and January 2010 at their first or second appointment. Patients were recruited by either an English speaking clinical nurse specialist or one of two radiographers, who between them spoke English, Gujarati and Hindi and Urdu. None were involved in the clinical care of the patients and all received training in 'Good Clinical Practice' and in the principles of informed consent. The Leicestershire, Northamptonshire and Rutland Ethics Committee approved the study. Eligible patients were aged 18-85 with a confirmed diagnosis of cancer with evidence of being informed of the diagnosis. Eligible patients were identified by the nurse specialist via the cancer registry with ethnicity confirmed by their surname and by hospital records.

Prior to their attendance a 'convenient' sample of eligible patients were sent an introductory letter outlining the study and inviting them to participate. All correspondence and questionnaires were available in English, Gujarati and Hindi. Consent was sought requesting patients complete three sets of questionnaires in writing, the first immediately, then at three months and nine month intervals. (Table 1)

## Questionnaires

Patients completed the Hospital Anxiety and Depression Scale (HADS-D) [33] and The Emotion Thermometers [34] which includes the Depression and Distress Thermometers [35] and Depression Thermometer (Dep T). The DT

1  
2  
3 problem checklist identified the patient's symptom burden. All are validated but  
4  
5 were not initially available in Gujarati or Hindi. A commercial company  
6  
7 undertook an iterative back-translation process.[36] A version of the Patient  
8  
9 Health Questionnaire (PHQ-9), which was already validated into Gujarati and  
10  
11 Hindi having been adapted for use in India, was the third questionnaire  
12  
13 used.[37] Several tools were used to address the concern that some were  
14  
15 ethnically biased.  
16  
17

18  
19  
20 An adaptive coping strategy (fighting spirit) and potentially maladaptive  
21  
22 strategies (hopelessness/helplessness, fatalism, anxiety preoccupation and  
23  
24 cognitive avoidance) were assessed via the Mini-MAC scale.[38] The locally  
25  
26 developed Cancer Insight and Denial questionnaire (CIDQ) included question  
27  
28 38 from the original MAC questionnaire to assess the use of denial. The vast  
29  
30 majority of participants chose to complete the first questionnaires at home,  
31  
32 returning them by post. Subsequent questionnaires were posted to participants.  
33  
34 Personal statements illustrating how patients coped were generated by two  
35  
36 qualitative questions, 'how would you describe your current illness', and 'what  
37  
38 does having cancer mean to you?'  
39  
40  
41  
42  
43  
44

### 45 **Statistical analysis**

46  
47 Depressive symptoms were assessed by HADS-D, ET Thermometers and  
48  
49 PHQ-9.  
50

51  
52  
53  
54 The revised classification of the original HADS-D identified the severity of  
55  
56 depressive symptoms (normal 0-7, mild 8-10, moderate 11-14 and severe 15-  
57  
58  
59  
60



1  
2  
3 21.[39] A threshold of  $\geq 11$  identified patients with moderate symptoms.  
4  
5 However following the recommendation to have a lower threshold for cancer  
6  
7 patients than in general practice,  $\geq 8$  was selected for HADS-D.[40] This is  
8  
9 supported by a review of 747 papers using HADS-D where the best balance  
10  
11 between sensitivity and specificity was achieved most often when using the cut-  
12  
13 off  $\geq 8$  (Cronbach's alpha coefficient, 0.80).[41] Threshold scores of  $\geq 10$ ,  $\geq 15$ ,  
14  
15  $\geq 20$  for PHQ-9 were in accordance with the original recommended scores.[42]  
16  
17 The current recommended threshold for the DT is  $\geq 4$  and this was retained in  
18  
19 the ET [43] and for this analysis. A prior power calculation determined a sample  
20  
21 size of 86 participants was required for each ethnic group.  
22  
23  
24  
25  
26

27  
28 Graphs denote 95% confidence intervals. Summary scores for selected coping  
29  
30 strategies were from the Mini-MAC and the denial indicators in the CIDQ.  
31  
32 Reference was made to individual indicators. Longitudinal data at baseline and  
33  
34 at three and nine months is reported.  
35  
36  
37

38  
39 Computation of frequencies, percentages and arithmetic median was conducted  
40  
41 to identify patterns in the data. Mann Whitney tests for continuous variables  
42  
43 detected differences between the ethnic groups and the direction of these  
44  
45 relationships. Spearman's Rank Order Tests ( $\rho$ ) explored correlations  
46  
47 between depressive symptoms (HADS-D as a continuous variable) and  
48  
49 deprivation.[44] We report analysis by age, gender, deprivation, tumour site,  
50  
51 place of birth and ethnicity.  
52  
53  
54  
55  
56  
57  
58  
59  
60

1  
2  
3 Chi<sup>2</sup> described the relationship between categorical variables. The extent to  
4 which patients used each coping strategy and how their use changed  
5 longitudinally is described. Associations between each strategy and depressive  
6 symptoms is reported. Qualitative data was recorded verbatim. When in  
7 Gujarati it was translated to English. Analysis was performed via SPSS v 18.  
8  
9  
10  
11  
12  
13

## 14 15 16 **Results**

17  
18 94 BSA patients were recruited. The BSA sample largely represents cancer  
19 patients within the Leicester Indian population and although of interest to other  
20 BSA cancer populations, these findings may not be representative. 53.8% were  
21 born in the Indian subcontinent, 33% in Africa of Indian descent and 12.9% in  
22 the UK. Hindus accounted for 53.2%, Muslims 25.5% and 17% Sikh. 185 BW  
23 patients were recruited. Several cancer sites are represented. The largest was  
24 114 breast cancer patients. The educational attainment, religion and place of  
25 birth were self-reported by participants. The demographic characteristics of this  
26 sample showed significant differences between ethnic groups in terms of their  
27 socio-economic status and educational attainment. These details and the  
28 patients' sex, age, cancer site and treatment intent are listed in Table 2.  
29  
30  
31  
32  
33  
34  
35  
36  
37  
38  
39  
40  
41  
42  
43  
44

## 45 **Demographics and depressive symptoms**

46  
47 Age was not associated with depression among BSA patients (rho: HADS-D,  
48 (p=0.62). Older BW patients were less likely to be depressed (rho: HADS-D  
49 (p=0.03). There was no statistical difference based on gender, with females  
50 having a higher mean depression score than males at baseline (HADS-D;  
51 females 4 (range 0-18) IQR 1,7) (males 3 (range 0-20) IQR 1,6) p=0.46.  
52  
53  
54  
55  
56  
57  
58  
59  
60

1  
2  
3  
4  
5 67.4% patients received radical treatment with the aim of cure or long term  
6  
7 control of disease and 32.6% received palliative treatment given with no  
8  
9 expectation of cure. Unexpectedly there was no evidence that receiving  
10  
11 palliative as opposed to radical (curative intent) treatment influenced a  
12  
13 difference in depressive symptoms (HADS-D $\geq$ 8 baseline p=0.088, 3 months  
14  
15 p=0.588 9 months p=1.0). Those with lung cancer, who generally have a poor  
16  
17 prognosis, had the highest median depression score via HADS-D of 5 (IQR  
18  
19 3,7,scale 0-21). The lowest score was attributed to people with prostate cancer  
20  
21 (Md 1 (IQR 0,5) (Supplementary table 1).  
22  
23  
24  
25  
26

27  
28 Data on educational attainment was recoded into two groups with those patients  
29  
30 reaching educational level of 15/16 removed. This represented groups at either  
31  
32 end of educational attainment. Those educated at the highest level had notably  
33  
34 less depressive symptoms than those with either no formal education or only  
35  
36 until up to the age of 11 (HADS-D  $\geq$ 8, Lowest Ed. 14/30 (46.7%); Highest Ed.  
37  
38 18/97 (18.6%) p=0.004. However these results should be treated with caution  
39  
40 given the educational systems of India and the UK are different. For example  
41  
42 some patients listing no formal education spoke up to five languages fluently.  
43  
44 Individual results in patients who reported little formal education were consistent  
45  
46 across assessment tools suggesting adequate comprehension.  
47  
48  
49  
50

51  
52 There was no significant difference in depressive symptoms between those  
53  
54 BSA patients originating from Africa compared to the Indian Sub continent at  
55  
56 baseline (MW: Africa 31/80 Md 4 (2,9) Indian Sub Continent Md 5.5 (2,11) Z=-  
57  
58  
59  
60

1  
2  
3 1.184  $p=0.23$ ). Neither was there a significant difference in the experience of  
4  
5 symptoms frequently associated with depression such as pain ( $p=0.23$ ), sleep  
6  
7 disturbances ( $p=0.91$ ) and fatigue ( $p=0.52$ ).  
8  
9

10  
11 Since socio-economic deprivation is closely associated with being a member of  
12  
13 an ethnic minority we considered the extent to which deprivation influenced the  
14  
15 strength of the relationship between ethnicity and depressive symptoms.  
16  
17

18 Although there was a strong association between ethnicity and deprivation (MW  
19  
20  $r=0.503$ ,  $p=0.0005$ ), deprivation had minimal influence on the strength of the  
21  
22 relationship between ethnicity and depression when comparing Pearson  
23  
24 product-moment correlations (PCC) with partial correlation calculations (Table  
25  
26  
27 3).  
28  
29

### 30 31 32 **Depressive symptoms at baseline**

33  
34 All three assessment tools showed approximately double the incidence of  
35  
36 depression in BSA patients compared to BW patients (Fig 1a-1d and  
37  
38 Supplementary table 2). Severe depression was also more common in the BSA  
39  
40 groups as demonstrated using a higher HADS-D score  $\geq 11$  (BSA 23/94 (24.5%)  
41  
42 BW 11/185 (5.9%)  $p=0.001$ ). A similar trend was seen using a higher PHQ-9  
43  
44 threshold  $\geq 15$  (BSA 13/85 (15%) BW 10/173 (5%)  $p=0.04$ ).  
45  
46  
47  
48

### 49 50 **Longitudinal trends in depressive symptoms**

51  
52 All tools indicated how BSA patients were more vulnerable to depressive  
53  
54 symptoms in contrast to BW patients. HADS-D  $\geq 8$  suggested significantly  
55  
56 higher rates of depressive symptoms among BSA patients longitudinally than  
57  
58  
59  
60

1  
2  
3 BW patients (Fig 1b). All three assessment tools indicated a slight decrease in  
4 depressive symptoms among BSA patients at three months. Depression rates  
5 had not fallen lower than those at baseline by nine months although the ethnic  
6 difference remained (Fig 1c &1d).  
7  
8  
9  
10

### 11 12 13 **Coping Strategies**

14  
15 BSA patients used coping strategies differently to BW patients particularly at  
16 baseline when greater use of potentially maladaptive strategies were associated  
17 with higher rates of depressive symptoms (Supplementary tables 3, 4 & 5).  
18  
19  
20  
21  
22  
23

### 24 25 **Hopelessness/ helplessness (Mini MAC)**

26  
27 *"its an awful thing to happen....feeling hopeless"*

28  
29 BSA patient No.16 at baseline  
30  
31  
32  
33

34 Although initially the majority of patients did not express helplessness nor  
35 hopelessness, BSA patients were far more likely to do so (p=0.0005). For  
36 example, more BSA patients than BW patients agreed with the statement 'I feel  
37 completely at a loss about what to do' (BSA 31 (33%); BW 23(12.4%)  
38 p=0.0005). Across the study period BSA patients had higher  
39 helplessness/hopelessness scores than BW patients although use decreased  
40 over time for both groups (Fig 2a). Helplessness/hopelessness is sometimes  
41 considered to be a substitute for depression so it was not surprising that over  
42 time more patients (BSA and BW combined) felt helplessness/hopelessness  
43 and also acknowledged depressive symptoms (MW: PHQ-9  $\geq$ 11/HADS-D  $\geq$ 8  
44 p=0.0005).  
45  
46  
47  
48  
49  
50  
51  
52  
53  
54  
55  
56  
57  
58  
59  
60

### **Anxiety preoccupation**

*“Cancer has totally changed my life. I am worried, anxious about my treatment and what lies ahead as this is the second occasion I am going through this”*

BSA No.103.

There was a negligible ethnic difference in the use of anxiety preoccupation. Over time this strategy was used less (Fig 2b). It was strongly associated with depression (HADS-D and PHQ-9,  $p=0.0005$ ). These patients were more likely to report depressive symptoms longitudinally (PHQ-9: baseline  $p=0.0005$ , 3 months  $p=0.0005$ , 9 months  $p=0.0005$ ).

### **Cognitive avoidance**

*Cancer is “...something that I put to the back of my mind and don't let it interfere with my day to day life”* BW No.118

Initially BSA patients used cognitive avoidance to cope more than BW patients (MW:  $p=0.0005$ ) (Fig 2c). For example, ‘I deliberately push all thoughts of cancer out of my mind’ (BSA 61/93 (65.6%); BW 63/185 (34.4%),  $p=0.0005$ ). Over time this ethnic difference continued but was only statistically significant at baseline as illustrated by a comparison of median scores (Fig 2c). At baseline, as one sample, those who used cognitive avoidance were more likely to have symptoms of depression (MW: PHQ-9  $p=0.007$ ; HADS-D  $\geq 8$   $p=0.001$ ; Dep.T  $\geq 4$   $p=0.002$ ). Over time avoidant patients did not continue to be depressed (HADS-D; 3 months,  $p=0.2$ ; 9 months, 0.14).

## Fighting Spirit

(I see cancer) *“as a challenge...a temporary state....a hurdle to get over”*

BW patient No.172

*“It means I have a fight on my hands but I’m determined to get better”*

BW No.354

A large number of patients in both ethnic groups approached their illness with an ‘adaptive’ coping strategy of ‘fighting spirit’ (Fig 2d). For example, ‘I am determined to beat this disease’ (BSA 85/93 (91.4%); BW 170/185 (91.9%)  $p=1.0$ ). There was little ethnic difference in the extent to which patients used this coping strategy (MW baseline  $p=0.47$ , 3 months  $p=0.57$ , 9 months  $p=0.2$ ).

## Fatalism

*“It’s horrible. Why me? My mum died from cancer. My sisters have cancer.*

*Why is this happening? I wish I’d never woken up after my operation”*

BSA No.125

More BSA patients were fatalistic when diagnosed with cancer than BW patients at baseline assessment (MW:  $p=0.0005$ ). However this was largely based on one of five Mini MAC indicators, ‘I’ve put myself in the hands of God’ (BSA 71/94 (75.5%); BW 60/185(32.4%)  $p=0.0005$ ). There was a gradual decrease in fatalism in both ethnic groups by nine months although it persisted among BSA patients (Fig 2e). Those who were fatalistic were more likely to experience

1  
2  
3 depressive symptoms (MW: HADS-D $\geq$ 8 p= 0.024; PHQ-9, p= 0.003) but not by  
4  
5 the Dep T.  $\geq$ 4 (p=0.101).  
6  
7

### 8 9 **Insight and Denial (CIDQ)**

10  
11 *"I'm not ill"*

12  
13  
14 Written at the top of an uncompleted questionnaire by a patient having  
15  
16 chemotherapy for breast cancer following surgery. BW No.127 at baseline  
17  
18

19  
20  
21 *"...part of me still feels there is nothing wrong with me and this is happening to*  
22  
23 *someone else. This is presumably my way of handling it all."* BW No.311 at  
24  
25 nine months  
26  
27

28  
29  
30 Of those who used denial, potentially a maladaptive coping strategy,[45] BSA  
31  
32 patients were over-represented, most notably at baseline assessments  
33  
34 (p=0.001). The ethnic gap remained longitudinally (Fig 2f). Of the three tools  
35  
36 assessing depression only PHQ-9 indicated an association between denial and  
37  
38 depression albeit weakly (MW: p= 0.039).  
39  
40

41  
42  
43 To facilitate comparisons with Roy's 2005 study [17], analysis of the single  
44  
45 indicator 'I don't really believe I have cancer' originating from the MAC  
46  
47 questionnaire was repeated. At baseline 229/278 patients (82%) accepted the  
48  
49 reality of their diagnosis by disagreeing with the statement. Of the 27 patients  
50  
51 who didn't believe that they had cancer, more were BSA (BSA 19/93 (20.2%);  
52  
53 BW 8/185 (4.3%), p=0.0001). Of interest is that 23 patients agreed with this  
54  
55 statement 'sometimes' (BSA 12 (52.2%); BW 11 (47.8%)). There was a strong  
56  
57  
58  
59  
60



1  
2  
3 trend towards BSA patients, who denied their diagnosis, to be more depressed  
4  
5 at baseline but sample numbers were too low to warrant analysis at nine  
6  
7 months (Fig 2g).  
8  
9

10  
11 We considered whether causes of distress listed in the distress thermometer  
12  
13 checklist explained ethnic differences in depressive symptoms. Cancer  
14  
15 treatments offered to both groups were similar so did not influence findings.  
16  
17 Critically BSA patients experienced more distress from physical symptoms of  
18  
19 illness and treatment than BW patients. There were 17 physical symptoms  
20  
21 listed in the DT checklist. In 13 categories BSA had statistically significant  
22  
23 increased symptoms compared to BW patients. For example, pain (BSA 51/83  
24  
25 (58%), BW 59/180 (32.8%)  $p=0.0001$ ), mouth sores (BSA 21/88 (24.1%), BW  
26  
27 12/179 (6.7%)  $p=0.0001$ ) and fevers (BSA 18/87 (20.7%), BW 5/177(2.8%)  
28  
29  $p=0.0001$ ). At three months significantly higher percentages of BSA patients  
30  
31 reported problems with pain, mouth sores, nausea, skin, washing and dressing  
32  
33 and getting around as causes for distress which were not reflected in BW  
34  
35 patients. By nine months differences had narrowed with the exception of pain  
36  
37 (BSA 19/31 (61.3%) v BW 41/121 (33.9%)  $p=0.009$ ) (Table 4).  
38  
39  
40  
41  
42  
43  
44

## 45 **Discussion**

46  
47 With the exception of our pilot study [17] we are not aware of another  
48  
49 comparison of how BSA and BW patients cope with cancer. It should be of  
50  
51 major concern to health care policy makers in the UK that this study provides  
52  
53 evidence that there is a higher prevalence of depressive symptoms among BSA  
54  
55 patients soon after the cancer diagnosis than BW patients. The percentages  
56  
57  
58  
59  
60

1  
2  
3 vary depending on the assessment tool used but all showed the same trend.  
4  
5 BSA rates for depression were twice that of BW patients using two tools. 35.1%  
6  
7 of BSA compared to 16.8% of BW patients ( $p=0.001$ ) had depressive symptoms  
8  
9 measured on the HADS-D scale ( $\geq 8$ ). This was confirmed on a version of the  
10  
11 PHQ-9 $\geq 10$  developed for India (35.3% BSA v 18.3% BW  $p=0.05$ ). This is a  
12  
13 critical finding since this is almost six times higher than reported within the UK  
14  
15 general population using the same assessment tool (6%).[46] Depression rates  
16  
17 for BW patients (HADS-D $\geq 8$ , 16.8%; PHQ-9 18.3%) were similar to those  
18  
19 reported in a recent meta-analysis of cancer patients (16.3%), being  
20  
21 approximately 2.5 times higher than in the general population.[4] What is  
22  
23 disturbing is the incidence of more severe depression in BSA patients which is  
24  
25 reflected in their HAD-D score  $\geq 11$  (BSA 24.5% v BW 5.9%  $p=0.0001$ ). These  
26  
27 findings supported trends in other studies, notably our pilot study. Using the  
28  
29 threshold HADS-D  $\geq 10$ , Roy [17] reported BSA 20.7% v BW 10.4% ( $p=0.001$ )  
30  
31 had moderate depressive symptoms. These concur with other reports which  
32  
33 suggest that ethnic minority cancer patients experience more psychological  
34  
35 distress than patients from host populations.[16, 17, 47, 48] However the BSA  
36  
37 population is heterogeneous. It would be grossly simplistic to assume all BSA  
38  
39 patients respond psychologically in the same way given the breadth and diversity  
40  
41 of their religious and cultural influences. However Indian Hindus comprised the  
42  
43 majority of our BSA sample and our findings may be of particular relevance to  
44  
45 this sub-group.  
46  
47  
48  
49  
50

51  
52  
53  
54 What is very interesting is that the HADS-D, PHQ-9 and Dep.T showed higher  
55  
56 levels of depressive symptoms in both ethnic groups at three months after  
57  
58  
59  
60

1  
2  
3 baseline, this being steeper among BSA patients. Although symptoms  
4  
5 decreased, BSA consistently reported higher rates of depression than BW  
6  
7 patients longitudinally. These findings confirmed our first hypothesis.  
8  
9

10  
11 A counter intuitive finding in this study is the similarity of depressive symptoms  
12  
13 in patients being treated with curative intent (radical) and palliative patients.  
14  
15 Although there were fewer questionnaires returned at three and nine months,  
16  
17 the ratio of radical and palliative patients remained the same (HADS-D  $\geq 8$   
18  
19 baseline  $p=0.08$ , 3 months  $p=0.58$ , 9 months  $p=1.0$ ). In fact this finding is  
20  
21 consistent with a recent meta-analysis.[4]  
22  
23  
24  
25  
26

27 At baseline the rates of fatalism helplessness/hopelessness and domains of  
28  
29 denial were far higher among BSA patients and there was a strong correlation  
30  
31 between these potentially maladaptive coping strategies and the incidence of  
32  
33 depression in both ethnic groups. Helplessness/hopelessness is strongly  
34  
35 associated with depression [49, 20, 50–54] as we found in this study. A similar  
36  
37 pattern was seen in the use of cognitive avoidance. Fatalism too was  
38  
39 associated with higher levels of depressive symptoms as demonstrated on both  
40  
41 the PHQ-9 and HADS-D which supports research from India [55, 56] and the  
42  
43 UK [57, 58] into the use of potentially maladaptive behaviours.  
44  
45  
46  
47  
48

49 In our previous study [17] denial was significantly related to depression in both  
50  
51 BW and BSA patients. BSA patients were far more likely to agree with the  
52  
53 statement in the MAC questionnaire (Question 38) 'I don't really believe I have  
54  
55 cancer'. In this study a minority of patients denied their diagnosis but again it  
56  
57  
58  
59  
60

1  
2  
3 was more common among BSA patients using the same indicator until nine  
4  
5 months (MW baseline  $p=0.0005$ , 3 months  $p=0.001$ , 9 months  $p=0.2$ ). Initially  
6  
7 this was strongly associated with depression however the sample numbers  
8  
9 were too small to consider longitudinal associations.  
10

11  
12  
13  
14 What is puzzling is that although BSA patients remained more depressed than  
15  
16 BW patients longitudinally, by three and nine months the use of coping  
17  
18 strategies did not explain this. At three months the only difference was in  
19  
20 helplessness/hopelessness scores ( $p=0.043$ ) and by nine months the ethnic  
21  
22 differences in the use of coping strategies were insignificant. Interestingly by  
23  
24 nine months the trend towards higher depression among BSA patients  
25  
26 remained. Even taking into account a lag time for the alleviation of depressive  
27  
28 symptoms after less use of maladaptive coping, there remains an incomplete  
29  
30 explanation as to why more BSA patients in particular remain so distressed.  
31  
32 Our hypothesis that a greater use of maladaptive coping strategies would reflect  
33  
34 higher rates of depressive symptoms was therefore only partially confirmed. A  
35  
36 retrospective audit into referral to psycho oncology or prescribing patterns of  
37  
38 psychotropic medication in the two groups did not suggest a difference that  
39  
40 could account for this.  
41  
42  
43  
44  
45  
46

47  
48 We considered whether the burden of physical symptoms explained this ethnic  
49  
50 gap. BSA patients were more likely to report physical symptoms at baseline  
51  
52 and at three months. This was particularly true for pain, nausea, skin concerns,  
53  
54 mouth sores, tingling and feeling swollen. These symptoms peaked at three  
55  
56 months but there was no statistically significant difference in symptomatology  
57  
58  
59  
60

1  
2  
3 between the two groups by nine months with the exception of pain. However  
4  
5 the ethnic differences in depressive symptoms persisted to nine months.  
6  
7 Possible explanations include the somatisation of physical symptoms being  
8  
9 undetected, inadequate symptom management, non-compliance due to a lack  
10  
11 of literacy and language skills or a patient preference for traditional medicines  
12  
13 for symptom control purposes. Our findings reflect the greater symptom burden  
14  
15 found in other ethnic minority cancer patients, such as among Chinese and  
16  
17 Hispanic populations [31, 32]. This study supports the original hypothesis that  
18  
19 more BSA cancer patients would self-report depressive symptoms than BW  
20  
21 patient over time. Our hypothesis that a greater use of potentially maladaptive  
22  
23 coping strategies would reflect higher rates of depression among BSA patients  
24  
25 was supported but only until the three month point. A heavier symptom burden  
26  
27 among BSA patients does appear to contribute to depression rates among this  
28  
29 ethnic minority compared to the host population.  
30  
31  
32  
33  
34  
35

### 36 **Limitations**

37  
38  
39  
40 Limitations to the study are acknowledged. The BSA sample largely represents  
41  
42 cancer patients within the Leicester Indian population and, although of interest  
43  
44 to other BSA cancer populations, these findings may not represent them. In  
45  
46 addition there was a large sample of patients with breast cancer, which risks  
47  
48 under-representation of those patients with other body site cancers.  
49

50  
51 Difficulties in recruitment and retaining BSA participants by nine months  
52  
53 reduced the sample size[59]. Self-reported questionnaires indicate the  
54  
55  
56  
57  
58  
59  
60

1  
2  
3 presence of depressive symptoms but given the absence of psychiatric  
4  
5 interviews this is not diagnostic of a depressive disorder.  
6  
7

8  
9  
10 Modulations in patient mood between the three data collection points are not  
11  
12 represented. It is also likely that depressive symptoms are underreported since  
13  
14 anecdotally those who were most distressed often did not feel able to participate  
15  
16 in the study.  
17  
18

### 20 **Recommendations**

21  
22  
23 The decreased use of maladaptive coping strategies among BSA patients in the  
24  
25 first few months after diagnosis requires investigation, the aim being to reduce  
26  
27 the associated distress earlier along the cancer trajectory. Evidence of greater  
28  
29 distress among BSA patients caused by a heavier symptom burden than among  
30  
31 BW patients also needs further study since several potential causes are  
32  
33 reversible by proactive patient assessments during cancer treatment and follow-  
34  
35 up.  
36  
37  
38  
39

### 40 **Conclusion**

41  
42  
43 Health professionals need to be aware of a greater probability of depressive  
44  
45 symptomatology and how this may present clinically, including somatic  
46  
47 symptoms, in the first nine months after diagnosis if this ethnic disparity in  
48  
49 mental wellbeing is to be addressed.  
50  
51  
52  
53  
54  
55  
56  
57  
58  
59  
60

## Acknowledgements

Professor Aziz Sheikh (Edinburgh), Drs Amandeep Dhadha, Raj Roy (Hull), Muthu Kumar (Derby) and Anu Gore (Leicester) helped in the design of the trust questionnaire. Alex Mitchell designed the Cancer Insight Denial questionnaire. Karen Lord was funded by the Hope Against Cancer charity: Kausher Ibrahim and Sawan Kumar by University Hospital of Leicester NHS Trust Charitable Funds. Mrs Ghislaine Boyd (radiotherapy manager) was unfailingly helpful. Mr Rob Day of Pfizer (UK) supplied the Indian version of the PHQ-9, which had been developed for India by Pfizer India.

## Funding

Hope Against Cancer – financial support

**Competing Interests** - None

## Contributorship

Karen Lord

Patient recruitment, data collection, data analysis, manuscript production

Kausher Ibrahim

Translation of study documentation, patient recruitment, data collection, manuscript production

Sawan Kumar

Translation of study documentation, patient recruitment, data collection, manuscript production

Alex J Mitchell

Study design, data analysis, manuscript production

Nicky Rudd

1  
2  
3  
4  
5  
6  
7  
8  
9  
10  
11  
12  
13  
14  
15  
16  
17  
18  
19  
20  
21  
22  
23  
24  
25  
26  
27  
28  
29  
30  
31  
32  
33  
34  
35  
36  
37  
38  
39  
40  
41  
42  
43  
44  
45  
46  
47  
48  
49  
50  
51  
52  
53  
54  
55  
56  
57  
58  
59  
60

Study design, patient recruitment, manuscript production

R Paul Symonds

Study design, acquiring funding, patient recruitment, data analysis, manuscript production

**Data sharing**

All available data has been included in the manuscript and supplementary tables.

For peer review only



## References

1. Kennard BD, Stewart SM, Olvera R, et al. Nonadherence in Adolescent Oncology Patients: Preliminary Data on Psychological Risk Factors and Relationships to Outcome. *J Clin Psychol Med S* 2004;**11**:31-39. DOI 0.1023/B:JOCS.0000016267.21912.74.
2. Steginga SK, Campbell A, Ferguson M, et al. Socio-demographic, psychosocial and attitudinal predictors of help seeking after cancer. *Psychooncology* 2008;**17**:997-1005. DOI 10.1002/pon.1317.
3. Satin JR, Linden W, Phillips MJ. Depression as a predictor of disease progression and mortality in cancer patients: a meta-analysis. *Cancer* 2008;**115**:5349-5361.
4. Mitchell AJ, Chan M, Bhatti H, et al. Prevalence of depression, anxiety, and adjustment disorder in oncological, haematological, and palliative-care settings: a meta-analysis of 94 interview-based studies. *Lancet Oncol* 2011;**12**:160-174. DOI:10.1016/S1470-2045(11)70002-X.
5. Hinz A, Krauss O, Hauss JP, et al. Anxiety and depression in cancer patients compared with the general population. *Eur J Cancer Care* 2010;**19**:522-529. DOI 10.1111/j.1365-2354.2009.01088.x.

- 1  
2  
3 6. Weich S, Nazroo J, Sproston K, et al. Common mental disorders and  
4  
5 ethnicity in England: the EMPIRIC study. *Psychol Med* 2004;**34**:1543-  
6  
7 1551.  
8  
9
- 10  
11  
12 7. Shavers VL, Brown ML. Racial and ethnic disparities in the receipt of  
13  
14 cancer treatment. *J Natl Cancer Inst* 2002;**94**:334-57.  
15  
16
- 17  
18  
19 8. Ward E, Jemal A, Cokkinides V, et al. Cancer disparities by race/ethnicity  
20  
21 and socioeconomic status. *CA Cancer J Clin* 2004;**54**:78-93.  
22  
23
- 24  
25 9. All party parliamentary group on cancer (2009) Report of the all party  
26  
27 parliamentary group of cancer's enquiry into inequalities in cancer  
28  
29 available at [www.appq-cancer.uk](http://www.appq-cancer.uk).  
30  
31
- 32  
33  
34 10. Department of Health (2007), Cancer Reform Strategy available at  
35  
36 [http://www.dh.gov.uk/prod\\_consum\\_dh/groups/dh\\_digitalassets/documen](http://www.dh.gov.uk/prod_consum_dh/groups/dh_digitalassets/documents/digitalasset/dh_081007.pdf)  
37  
38 [ts/digitalasset/dh\\_081007.pdf](http://www.dh.gov.uk/prod_consum_dh/groups/dh_digitalassets/documents/digitalasset/dh_081007.pdf), The Stationery Office, UK.  
39  
40
- 41  
42  
43 11. Department of Health (2011) Improving outcomes a strategy for cancer  
44  
45 via  
46  
47 [http://www.dh.gov.uk/prod\\_consum\\_dh/groups/dh\\_digitalassets/documen](http://www.dh.gov.uk/prod_consum_dh/groups/dh_digitalassets/documents/digitalasset/dh_123394.pdf)  
48  
49 [ts/digitalasset/dh\\_123394.pdf](http://www.dh.gov.uk/prod_consum_dh/groups/dh_digitalassets/documents/digitalasset/dh_123394.pdf), Department of Health, London.  
50  
51  
52  
53  
54  
55  
56  
57  
58  
59  
60

- 1  
2  
3 12. Goss E, Lopez AM, Brown CL, et al. American Society of Clinical  
4  
5 Oncology policy statement: disparities in cancer care. *J Clin Oncol*  
6  
7 2009;**27**:2881-2885, DOI 10.1200/JCO.2008.21.1680.  
8  
9  
10  
11  
12 13. US Department of Health and Human Services (2011) President's  
13  
14 Cancer Panel: American's demographic and cultural transformations:  
15  
16 Implications for cancer Washington DC 1-100.  
17  
18  
19  
20  
21 14. Department of Health and Human Services (USA) (2011), HHS Action  
22  
23 plan to reduce racial and ethnic health disparities available via  
24  
25 [http://minorityhealth.hhs.gov/npa/files/Plans/HHS/HHS\\_Plan\\_complete.p](http://minorityhealth.hhs.gov/npa/files/Plans/HHS/HHS_Plan_complete.pdf)  
26  
27 [df](http://minorityhealth.hhs.gov/npa/files/Plans/HHS/HHS_Plan_complete.pdf), Department of Health and Human Services, Washington DC.  
28  
29  
30  
31 15. Office for National Statistics 2011 census ethnic groups: local authorities  
32  
33 in England and Wales Table KS201EW  
34  
35 <http://www.ons.gov.uk/ons/search/index.html?newquery=KS201EW>.  
36  
37  
38  
39  
40 16. Bhopal, R., 2004. Glossary of terms relating to ethnicity and race: for  
41  
42 reflection and debate, *Journal of Epidemiology and Community Health*,  
43  
44 **58**(6), pp. 441-445. Doi 10.1136/jech2003.013466  
45  
46  
47  
48  
49 17. Roy R, Symonds RP, Kumar DM, et al. The use of denial in an ethnically  
50  
51 diverse British cancer population: a cross-sectional study. *Br J Cancer*  
52  
53 2005;**92**:1393-1397, doi:10.1038/sj.bjc.6602523  
54  
55  
56  
57  
58  
59  
60

- 1  
2  
3 18. Lockett T, Butow PN, King MT, et al. A review and recommendations for  
4 optimal outcome measures of anxiety, depression and general distress in  
5 studies evaluating psychosocial interventions for English-speaking adults  
6 with heterogeneous cancer diagnoses. *Support Care Cancer*  
7  
8  
9  
10  
11  
12 2010;**18**:1241-1262, DOI 10.1007/s00520-010-0932-8.  
13  
14  
15  
16 19. Carlson LE, Groff SL, Maciejewski O, et al. Screening for distress in lung  
17 and breast cancer outpatients: a randomized controlled trial. *J Clin Oncol*  
18  
19  
20 2010;**28**:4884-4891, DOI 0.1200/JCO.2009.27.3698.  
21  
22  
23  
24  
25 20. Akechi T, Okuyama T, Sugawara Y, et al. Major depression, adjustment  
26 disorders, and post-traumatic stress disorder in terminally ill cancer  
27 patients: associated and predictive factors. *J Clin Oncol* 2004;**22**: 1957-  
28  
29  
30 1965, DOI 10.1200/JCO.2004.08.149.  
31  
32  
33  
34  
35  
36 21. Stark D, Kiely M, Smith A, et al. Anxiety Disorders in Cancer Patients:  
37  
38 Their Nature, Associations, and Relation to Quality of Life. *J Clin Oncol*  
39  
40 2002;**20**(14):3137-3148.  
41  
42  
43  
44  
45 22. Clarke JA, Inu, TS, Silliman RA, et al. Patients' perceptions of quality of  
46  
47 life after treatment for early prostate cancer. *J Clin Oncol* 2003;**21**:3777-  
48  
49 3784.  
50  
51  
52  
53  
54  
55  
56  
57  
58  
59  
60

- 1  
2  
3 23. Hoyer M, Johansson B, Nordin K, et al. Health-related quality of life  
4 among women with breast cancer-a population-based study. *Acta*  
5 *Oncologica* 2011;**50**(7):1015-1026.  
6  
7  
8  
9  
10  
11 24. Lazarus RS, Folkman S, Adams S. *Stress, appraisal and coping*,  
12 Springer, New York; 1984.  
13  
14  
15  
16  
17 25. Moos RH, Holahan CJ. Dispositional and contextual perspectives on  
18 coping: toward an integrative framework. *J Clin Psychol*  
19 2003;**59**(12):1387-1403.  
20  
21  
22  
23  
24  
25  
26  
27 26. Hopwood P, Stephens RJ. Depression in patients with lung cancer:  
28 prevalence and risk factors derived from quality-of-life data. *J Clin Oncol*  
29 2000;**18**(4):893-903.  
30  
31  
32  
33  
34  
35  
36 27. Breen SJ, Baravelli CM, Schofield PE, et al. Is symptom burden a  
37 predictor of anxiety and depression in patients with cancer about to  
38 commence chemotherapy? *MJA* 2009;**190**(7):s99-s104  
39  
40  
41  
42  
43  
44  
45 28. Shi Q, Smith TG, Michonski JD, et al. Symptom Burden in Cancer  
46 Survivors 1 Year After Diagnosis. *Cancer* 2011;**117**:2779–90,  
47 10.1002/cncr.26146.  
48  
49  
50  
51  
52  
53  
54 29. Kroenke K, Johns SA, Theobald D, et al. Somatic symptoms in cancer  
55 patients trajectory over 12 months and impact on functional status and  
56  
57  
58  
59  
60

1  
2  
3 disability. *Support Care Cancer* 2013;**21**:765-773, DOI 10.1007/s00520-  
4  
5 012-1578-5.  
6  
7

8  
9  
10 30. Lam WWT, Bonanno GA, Mancini AD, et al. Trajectories of psychological  
11  
12 distress among Chinese women diagnosed with breast cancer. *Psycho*  
13  
14 *Oncol* 2010;**19**:1044-1051, DOI10.1002/pon.1658.  
15  
16

17  
18 31. Fu OS, Crew KD, Jacobson JS, et al. Ethnicity and persistent symptom  
19  
20 burst in breast cancer survivors *J Cancer Surviv* 2009;**3**: 241-250, DOI  
21  
22 10.1007/s11764-009-0100-7.  
23  
24

25  
26  
27 32. Yoon J, Malin JL, Tisnado DM, et al. Symptom management after breast  
28  
29 cancer treatment: is it influenced by patient characteristics? *Breast*  
30  
31 *Cancer Res Treat* 2008;**108**(1):69-77.  
32  
33

34  
35  
36 33. Zigmond AS, Snaith RP. The hospital anxiety and depression scale. *Acta*  
37  
38 *Psychiatr Scand* 1983;**67**:361-370.  
39  
40

41  
42  
43 34. Mitchell AJ, Baker-Glenn EA, Park B, et al. Can the Distress  
44  
45 Thermometer be improved by additional mood domains? Part II. What is  
46  
47 the optimal combination of Emotion Thermometers? *Psycho-oncology*  
48  
49 2010;**19**:134-140, DOI 10.1002/pon.1557.  
50  
51

- 1  
2  
3 35. Roth AJ, Kornblith AB, Batel-Copel L, et al. Rapid screening for  
4  
5       psychologic distress in men with prostate carcinoma: a pilot study.  
6  
7       *Cancer* 1998;**82**:1904-1908.  
8  
9  
10  
11  
12 36. Brislin RW. Back-translation for cross-cultural research. *Journal of Cross-*  
13  
14       *cultural Psychology* 1970;**1**:185-216, doi:  
15  
16       10.1177/135910457000100301.  
17  
18  
19  
20  
21 37. Kochhar PH, Rajadhyaksha SS, Suvarna VR. Translation and validation  
22  
23       of brief patient health questionnaire against DSM IV as a tool to diagnose  
24  
25       major depressive disorder in Indian patients. *J Postgrad Med*  
26  
27       2007;**53**:102-107.  
28  
29  
30  
31  
32 38. Watson M, Law M, Dossantos M, et al. The Mini-Mac; Further  
33  
34       development of the mental adjustment to cancer scale. *J Psychosoc*  
35  
36       *Oncol* 1994;**12**:33-46.  
37  
38  
39  
40  
41 39. Snaith RP. The Hospital Anxiety and Depression Scale. *Health Qual Life*  
42  
43       *Outcomes* 2003;**1**:29.  
44  
45  
46  
47 40. Morse R, Kendell K, Barton S. Screening for depression in people with  
48  
49       cancer: the accuracy of the hospital anxiety and depression scale. *Clin*  
50  
51       *Eff Nurs* 2005;**9**:188-196.  
52  
53  
54  
55  
56  
57  
58  
59  
60

- 1  
2  
3 41. Bjelland I, Dahl AA, Haug TT, et al. The validity of the Hospital Anxiety  
4 and Depression Scale. An updated literature review. *J Psychosomatic*  
5 *Res* 2002;**52**(2):69-77.  
6  
7  
8  
9  
10  
11 42. Kroenke K, Spitzer RL, Williams JBW. The PHQ-9 validity of a brief  
12 depression severity measure. *J Gen Intern Med* 2001;**16**:605-613.  
13  
14  
15  
16  
17 43. National Comprehensive Cancer Network 2011, December 10th 2010-  
18 last update, *NCCN guidelines: distress management* [Homepage of  
19 National Comprehensive Cancer Network], [Online].  
20 [http://www.nccn.org/professionals/physician\\_gls/f\\_guidelines.asp](http://www.nccn.org/professionals/physician_gls/f_guidelines.asp) [2011,  
21 9/ 25].  
22  
23  
24  
25  
26  
27  
28  
29  
30  
31 44. Office for National Statistics 2011, "*Neighbourhood Statistics 'Summary*  
32 *Statistics', citing indices of deprivation, 2007, UK Department for*  
33 *Communities and Local Government* [Homepage of Office for National  
34 Statistics], [Online]. <http://www.neighbourhood.statistics.gov.uk/> [2007-  
35 2011].  
36  
37  
38  
39  
40  
41  
42  
43  
44 45. Lazarus RS. Coping theory and research: past, present and future.  
45 *Psychosom Med* 1993;**55**(3):234-247.  
46  
47  
48  
49  
50  
51 46. National Institute for Health and Clinical Excellence (NICE) 2011,  
52 February 2010-last update, Clinical knowledge summaries (CKS) clinical  
53 topics. Depression; Available via  
54  
55  
56  
57  
58  
59  
60



1  
2  
3 [http://www.cks.nhs.uk/depression/management/scenario\\_bereavement/vi](http://www.cks.nhs.uk/depression/management/scenario_bereavement/vi)  
4  
5 [ew\\_full\\_scenario#-402794](#) [2012, 26/6].  
6  
7

- 8  
9  
10 47. Ashing-Giwa KT, Tejero JS, Kim J, et al. Examining predictive models of  
11 HRQOL in a population-based, multiethnic sample of women with breast  
12 carcinoma. *Qual Life Res* 2007;**16**:413-428, DOI 10.1007/s11136-006-  
13 9138-4.  
14  
15  
16  
17  
18  
19  
20 48. Ell K, Sanchez K, Vourlekis B, et al. Depression, correlates of depression  
21 and receipt of depression care among low-income women with breast or  
22 gynecologic cancer. *J Clin Oncol* 2005;**23**:3052-3060, DOI  
23 10.1200/JCO.2005.08.041  
24  
25  
26  
27  
28  
29  
30  
31 49. Osborne RH, Elsworth GR, Hopper JL. Age-specific norms and  
32 determinants of anxiety and depression in 731 women with breast cancer  
33 recruited through a population-based cancer registry. *Eur J Cancer*  
34 2003;**39**:755-762.  
35  
36  
37  
38  
39  
40  
41  
42 50. Schou I, Ekeberg O, Ruland CM, et al. Pessimism as a predictor of  
43 emotional morbidity one year following breast cancer surgery.  
44 *Psychooncology* 2004;**13**:309-320. DOI 10.1002/pon.747.  
45  
46  
47  
48  
49  
50  
51 51. Brothers BM, Andersen BL. Hopelessness as a predictor of depressive  
52 symptoms for breast cancer patients coping with recurrence.  
53 *Psychooncology* 2009;**18**:267-275, DOI 10.1002/pon.1394.  
54  
55  
56  
57  
58  
59  
60

- 1  
2  
3  
4  
5 52. Lo C, Zimmermann C, Rydall A, et al. Longitudinal Study of Depressive  
6  
7 Symptoms in Patients with Metastatic Gastrointestinal and Lung Cancer.  
8  
9 *J Clin Oncol* 2010;**28**:3084, DOI 10.1200/JCO.2009.26.9712.  
10  
11  
12  
13  
14 53. Grassi L, Travado L, Gil F, et al. Hopelessness and related variables  
15  
16 among cancer patients in the Southern European Psycho-Oncology  
17  
18 Study (SEPOS). *Psychosomatics* 2010;**51**:201-207, DOI  
19  
20 10.1176/appi.psy.51.3.201.  
21  
22  
23  
24  
25 54. Johansson M, Ryden A, Finizia C. Mental adjustment to cancer and its  
26  
27 relation to anxiety, depression, HRQL and survival in patients with  
28  
29 laryngeal cancer - A longitudinal study. *BMC Cancer* 2011;**11**:283, DOI  
30  
31 10.1186/1471-2407-11-283.  
32  
33  
34  
35  
36 55. Chaturvedi SK, Chandra PS, Channabasavanna SM, et al. Levels of  
37  
38 anxiety and depression in patients receiving radiotherapy in India.  
39  
40 *Psychooncology* 1996;**5**:343-346, DOI: 10.1002/(SICI)1099-  
41  
42 1611(1996)12).  
43  
44  
45  
46  
47 56. Kishore J, Ahmad I, Kaur R, et al. Beliefs and perceptions about cancers  
48  
49 among patients attending radiotherapy OPD in Delhi, India. *Asian Pac J*  
50  
51 *Cancer Prev* 2008;**9**:155-158.  
52  
53  
54  
55  
56  
57  
58  
59  
60

1  
2  
3 57. Szczepura A, Price C, Gumber A. Breast and bowel cancer screening  
4 uptake patterns over 15 years for UK South Asian ethnic minority  
5 populations corrected for differences in socio-demographic  
6 characteristics. *BMC Public Health* 2008;**8**:346.  
7  
8  
9

10  
11  
12  
13  
14 58. Miles A, Rainbow S, von Wagner C. Cancer Fatalism and Poor Self-  
15 Rated Health Mediate the Association between Socioeconomic Status  
16 and Uptake of Colorectal Cancer Screening in England. *Cancer*  
17 *Epidemiol Biomarkers Prev* 2011;**20**:2132-2140, DOI 10.1158/1055-  
18 9965.EPI-11-0453.  
19  
20  
21  
22  
23

24  
25  
26  
27 59. Symonds RP, Lord K, Mitchel AJ, et al. Recruitment of ethnic minorities  
28 into clinical trials: experience from the front lines, *Br J Cancer*,  
29 2012;**107**:1017-1021.  
30  
31  
32  
33  
34  
35  
36  
37  
38  
39  
40  
41  
42  
43  
44  
45  
46  
47  
48  
49  
50  
51  
52  
53  
54  
55  
56  
57  
58  
59  
60

**Table 1: Recruitment and retention**

| <b>Patient Participation</b>                             | <b>BSA</b> | <b>BW</b> | <b>Total</b> |
|----------------------------------------------------------|------------|-----------|--------------|
| Total consented                                          | 179        | 329       | 508          |
| Consented /completed Q1                                  | 94         | 185       | 279          |
| Completed Q2                                             | 56         | 144       | 200          |
| Completed Q3                                             | 32         | 117       | 149          |
| Retained in study from consent until completion of study | 34%        | 63%       | 53.4%        |

  

| <b>Reasons for withdrawal from study</b>        |            |           |            |
|-------------------------------------------------|------------|-----------|------------|
| Consented but did not complete a questionnaires | <b>85</b>  | <b>51</b> | <b>136</b> |
| Died                                            | 5          | 3         | 8          |
| Returned to country of origin                   | 5          | 0         | 5          |
| Family member reversed consent of patient       | 8          | 0         | 8          |
| Patient verbally withdrew                       | 12 (14.1%) | 12(23.5%) | 24         |
| Avoidant behaviour                              | 55 (64%)   | 0 (0%)    | 55         |
| Lost to follow up (excluding travel abroad)     | 0          | 29        | 29         |
| Not interested in research subject              | 0          | 2         | 2          |
| Already involved in another study               | 0          | 5         | 5          |

Table 2: Demographics

|                                                                                                                                                                              | Total (%)                                                           | British South Asian (BSA)                                                | British White (BW)                                                             | p value                                                     |
|------------------------------------------------------------------------------------------------------------------------------------------------------------------------------|---------------------------------------------------------------------|--------------------------------------------------------------------------|--------------------------------------------------------------------------------|-------------------------------------------------------------|
| <b>Number</b>                                                                                                                                                                | 279                                                                 | 94                                                                       | 185                                                                            |                                                             |
| Male                                                                                                                                                                         | 88 (31.5%)                                                          | 25 (26.6%)                                                               | 64 (34.6%)                                                                     | Chi <sup>2</sup><br>p=0.223                                 |
| Female                                                                                                                                                                       | 190 (68%)                                                           | 69 (73.4%)                                                               | 121 (65.4%)                                                                    |                                                             |
| <b>Age</b><br>median (Inter Quartile Range)                                                                                                                                  |                                                                     | 57.1 (19)                                                                | 61 (14)                                                                        | Wilcoxon<br>rank sum<br>test(WRST)<br>Z=-14.480<br>p=0.0005 |
| <b>IMDS (1-20)*</b><br>Median (IQR)                                                                                                                                          |                                                                     | 6.5 ( IQR 4,10)                                                          | 16(11,18)                                                                      | WRST<br>Z=-14.435<br>p=0.0005                               |
| <b>Educational Attainment</b><br>No formal education<br>Junior school (up to 11)<br>Senior school (15-16)<br>Sixth form (17-18)<br>University or college<br><b>**272 pts</b> | 30 (10.7%)<br>8 (2.8%)<br>97 (34.7%)<br>22 (7.8%)<br>115 (41.2%)    | 27 (29.7%)<br>4 (4.4%)<br>16 (17.8%)<br>11 (12.1%)<br>33 (36.3%)         | 3 (1.7%)<br>4 (2.2%)<br>81 (44.8%)<br>11 (6.1%)<br>82 (45.3%)                  | Chi <sup>2</sup><br>p=0.0005                                |
| <b>Religion</b><br>Christian<br>Muslim<br>Hindu<br>Sikh<br>Other<br>None                                                                                                     | 148 (53%)<br>24 (9%)<br>50 (18%)<br>16 (6%)<br>4 (1%)<br>37 (13%)   | nil<br>24 (25.5%)<br>50 (53.2%)<br>16 (17%)<br>1 (1.06%)<br>nil          | 148 (80%)<br>nil<br>nil<br>nil<br>3 (1.6%)<br>34 (18.4%)                       |                                                             |
| <b>Questionnaire Language</b><br>English<br>Gujarati<br>Urdu ( <i>verbal translation</i> )                                                                                   | 267 (96%)<br>11 (4%)<br>1 (0.3%)                                    |                                                                          |                                                                                |                                                             |
| <b>Place of birth</b><br>UK<br>British Forces overseas<br>USA<br>Africa<br>Indian sub continent                                                                              | 195 (70%)<br>2 (0.7%)<br>1 (0.3%)<br>31 (11.1%)<br>50 (17.9%)       | 13 (14%)<br>nil<br>nil<br>31 (33%)<br>50 (53%)                           | 182 (98.4%)<br>2 (1.08%)<br>1 (0.52%)<br>nil<br>nil                            |                                                             |
| <b>Diagnosis</b><br>Breast<br>Colorectal<br>Gynaecological<br>Prostate<br>Lung<br>Other                                                                                      | 114 (41%)<br>45 (16%)<br>33 (12%)<br>23 (8%)<br>19 (7%)<br>43 (15%) | 34 (36.2%)<br>15 (16%)<br>19 (20.2%)<br>3 (3.2%)<br>6 (6.4%)<br>17 (18%) | 80 (43.2%)<br>30 (16.2%)<br>15 (8.1%)<br>20 (10.8%)<br>13 (7.0%)<br>26 (14.6%) |                                                             |
| <b>Type of treatment</b><br>Radical ( <i>curative intent</i> )<br>Palliative                                                                                                 | 188 (67.4%)<br>91(32.6%)                                            | 64 (68.1%)<br>30 (31.9%)                                                 | 124 (67.4%)<br>61 (33%)                                                        | Chi <sup>2</sup><br>p=0.966                                 |
| <b>Time from diagnosis to first interview (wks)</b><br>Median (IQR)                                                                                                          | 7(3)                                                                | 8(3)                                                                     | 6(3)                                                                           | WRST<br>Z=-14.506<br>P=0.0005                               |

\* Index Multiple Deprivation Scale (Office National Statistics, 2007)

\*\* No. of patient who provided their educational attainment

**Table 3: Influence of deprivation**

| Ethnicity and depressive symptoms corrected for deprivation | No. | Pearson product-moment correlation | p-value | No. | Correlation corrected for deprivation | p-value |
|-------------------------------------------------------------|-----|------------------------------------|---------|-----|---------------------------------------|---------|
| HADS D                                                      | 277 | -.274                              | 0.0005  | 276 | -.235                                 | 0.0005  |
| PHQ-9                                                       | 256 | -.257                              | 0.0005  | 255 | -.208                                 | 0.001   |
| DepT                                                        | 262 | -.131                              | 0.033   | 261 | -.118                                 | 0.057   |

For peer review only

**Table 4: Ethnic differences in reporting of physical symptoms**

| Problem              |          |     | n=  | No  | %    | Yes | %    | X <sup>2</sup> |
|----------------------|----------|-----|-----|-----|------|-----|------|----------------|
| Pain                 | Baseline | BSA | 88  | 37  | 42   | 51  | 58   |                |
|                      |          | BW  | 180 | 121 | 67   | 59  | 32.8 | 0.0001         |
|                      | 3 months | BSA | 53  | 14  | 26.4 | 39  | 73.6 |                |
|                      |          | BW  | 141 | 92  | 65.2 | 49  | 34.8 | 0.0001         |
|                      | 9 months | BSA | 31  | 12  | 38.7 | 19  | 61.3 |                |
|                      |          | BW  | 121 | 80  | 66.1 | 41  | 33.9 | 0.009          |
| Nausea               | Baseline | BSA | 83  | 56  | 68   | 27  | 32.5 |                |
|                      |          | BW  | 178 | 141 | 79   | 37  | 20.8 | 0.058          |
|                      | 3 months | BSA | 54  | 29  | 53.7 | 25  | 46.3 |                |
|                      |          | BW  | 140 | 91  | 65   | 49  | 35   | 0.198          |
|                      | 9 months | BSA | 29  | 22  | 75.9 | 7   | 24.1 |                |
|                      |          | BW  | 121 | 104 | 86   | 17  | 14   | 0.574          |
| Getting around       | Baseline | BSA | 85  | 59  | 69   | 26  | 30.6 |                |
|                      |          | BW  | 177 | 155 | 88   | 22  | 12.4 | 0.001          |
|                      | 3 months | BSA | 55  | 33  | 60   | 22  | 40   |                |
|                      |          | BW  | 140 | 112 | 80   | 28  | 20   | 0.007          |
|                      | 9 months | BSA | 31  | 23  | 74.2 | 8   | 25.8 |                |
|                      |          | BW  | 120 | 95  | 79.2 | 25  | 20.8 | 0.724          |
| Bathing and dressing | Baseline | BSA | 86  | 62  | 72   | 24  | 27.9 |                |
|                      |          | BW  | 178 | 167 | 94   | 11  | 6.2  | 0.0001         |
|                      | 3 months | BSA | 55  | 42  | 76.4 | 13  | 23.6 |                |
|                      |          | BW  | 140 | 129 | 92.1 | 11  | 7.9  | 0.006          |
|                      | 9 months | BSA | 31  | 25  | 80.6 | 6   | 19.4 |                |
|                      |          | BW  | 120 | 104 | 86.7 | 16  | 13.3 | 0.574          |
| Mouth sores          | Baseline | BSA | 87  | 66  | 76   | 21  | 24.1 |                |
|                      |          | BW  | 179 | 167 | 93   | 12  | 6.7  | 0.0001         |
|                      | 3 months | BSA | 55  | 37  | 67.3 | 18  | 32.7 |                |
|                      |          | BW  | 140 | 114 | 81.4 | 26  | 18.6 | 0.053          |
|                      | 9 months | BSA | 31  | 25  | 80.6 | 6   | 19.4 |                |
|                      |          | BW  | 121 | 109 | 90.1 | 12  | 9.9  | 0.255          |
| Fevers               | Baseline | BSA | 87  | 69  | 79   | 18  | 20.7 |                |
|                      |          | BW  | 177 | 172 | 97   | 5   | 2.8  | 0.0001         |
|                      | 3 months | BSA | 54  | 42  | 77.8 | 12  | 22.2 |                |
|                      |          | BW  | 139 | 127 | 91.4 | 12  | 8.6  | 0.020          |
|                      | 9 months | BSA | 31  | 26  | 83.9 | 5   | 16.1 |                |
|                      |          | BW  | 119 | 108 | 90.8 | 11  | 9.2  | 0.436          |
| Skin                 | Baseline | BSA | 84  | 42  | 50   | 42  | 50   |                |
|                      |          | BW  | 179 | 156 | 87   | 23  | 12.8 | 0.0001         |
|                      | 3 months | BSA | 56  | 26  | 46.4 | 30  | 53.6 |                |
|                      |          | BW  | 142 | 96  | 67.8 | 46  | 32.4 | 0.009          |
|                      | 9 months | BSA | 31  | 16  | 51.6 | 15  | 48.4 |                |
|                      |          | BW  | 121 | 86  | 71.1 | 35  | 28.9 | 0.065          |

**Fig 1a-1d: Longitudinal comparison of depressive symptoms in BSA and BW patients**

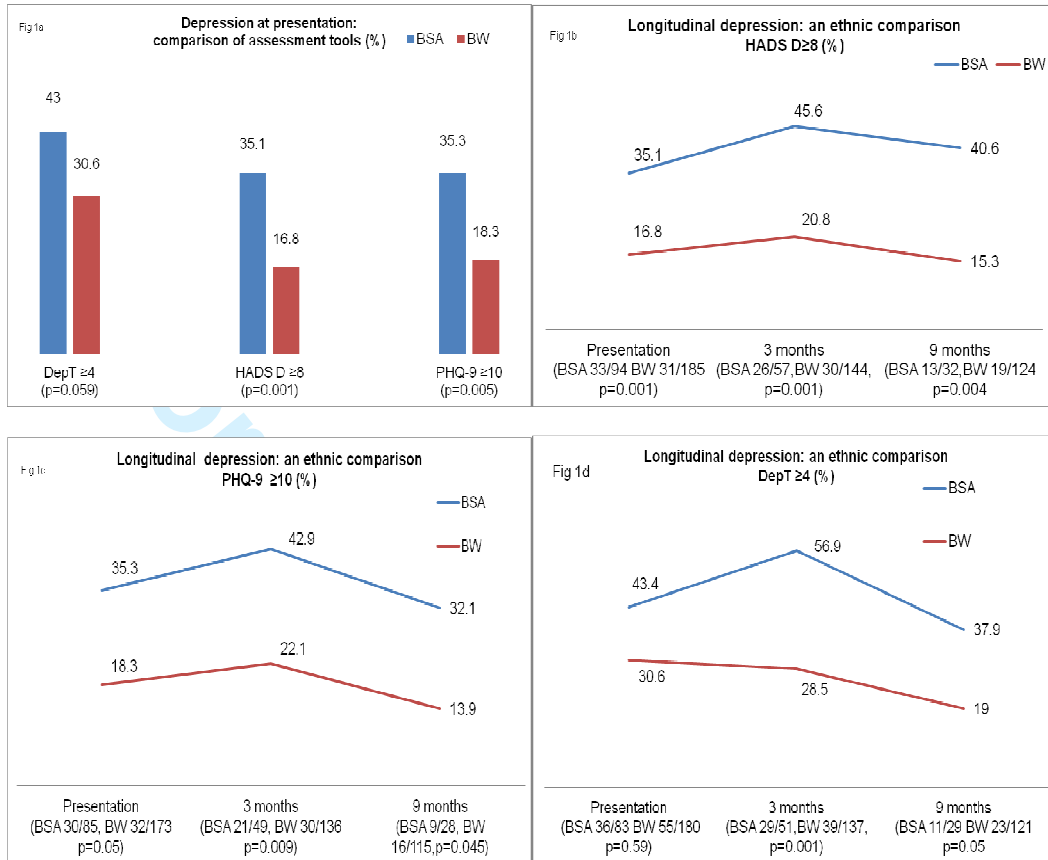



Fig 2a-g Longitudinal ethnic differences in coping strategies

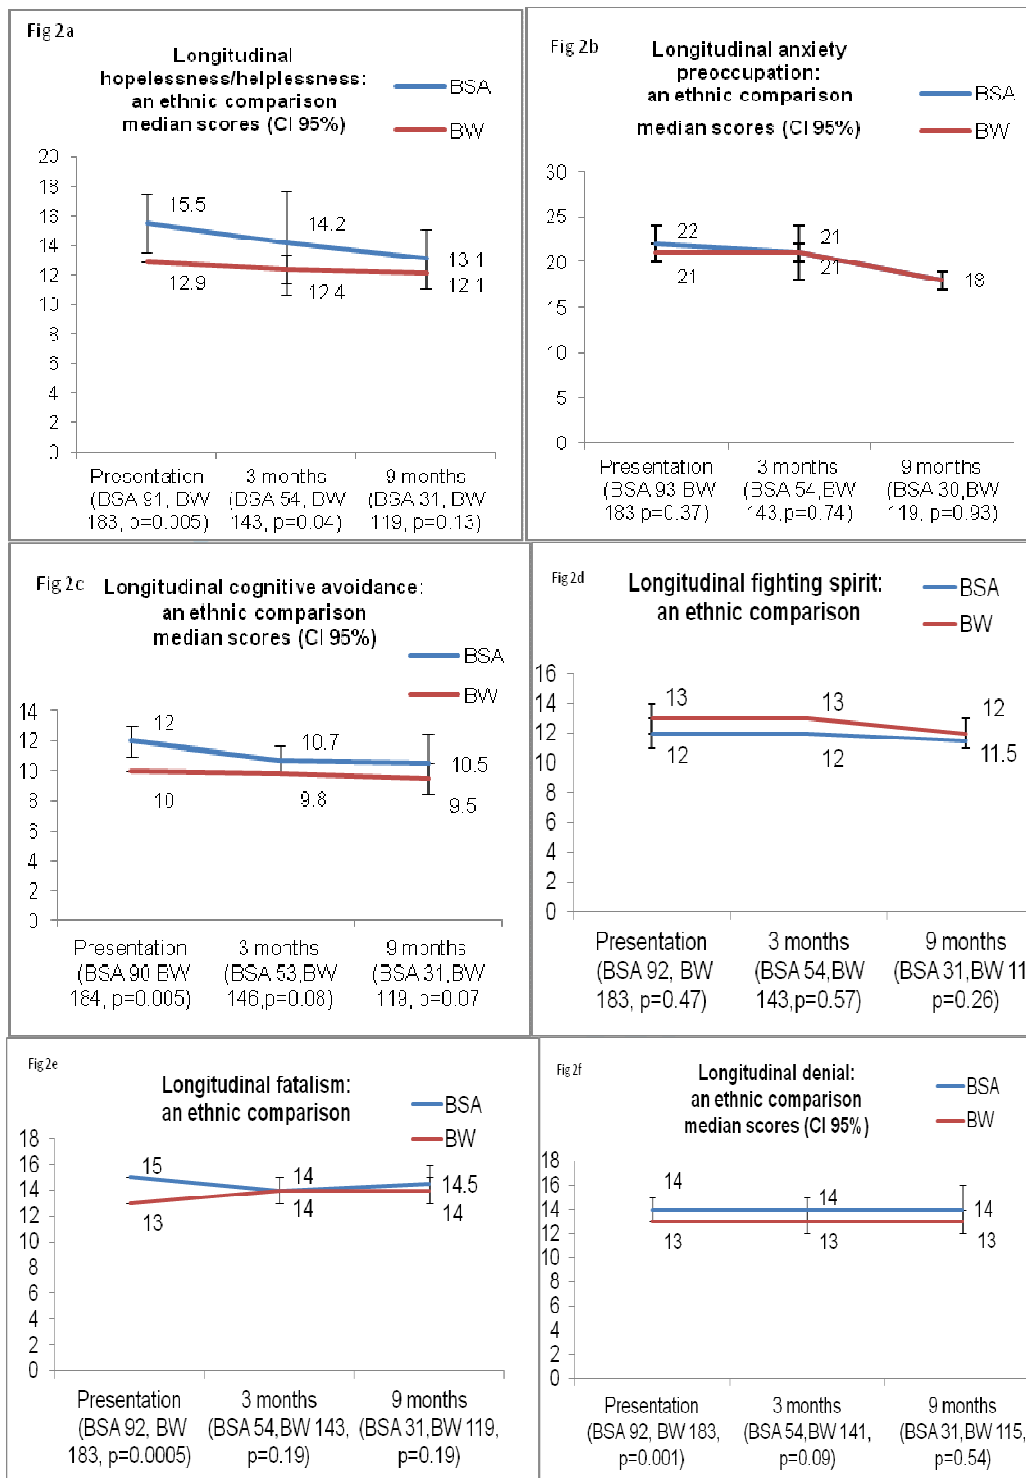

Note: 95% CI was zero for some median scores

Fig 2a-g Longitudinal ethnic differences in coping strategies

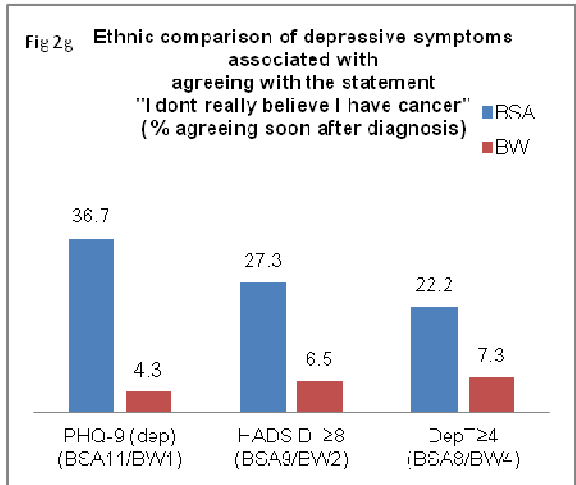

1  
2  
3  
4  
5  
6  
7  
8  
9  
10  
11  
12  
13  
14  
15  
16  
17  
18  
19  
20  
21  
22  
23  
24  
25  
26  
27  
28  
29  
30  
31  
32  
33  
34  
35  
36  
37  
38  
39  
40  
41  
42  
43  
44  
45  
46  
47  
48  
49  
50  
51  
52  
53  
54  
55  
56  
57  
58  
59  
60

STROBE 2007 (v4) Statement—Checklist of items that should be included in reports of *cross-sectional studies*

| Section/Topic                | Item # | Recommendation                                                                                                                                                                       | Reported on page # |
|------------------------------|--------|--------------------------------------------------------------------------------------------------------------------------------------------------------------------------------------|--------------------|
| Title and abstract           | 1      | (a) Indicate the study's design with a commonly used term in the title or the abstract                                                                                               | 1                  |
|                              |        | (b) Provide in the abstract an informative and balanced summary of what was done and what was found                                                                                  | 2                  |
| <b>Introduction</b>          |        |                                                                                                                                                                                      |                    |
| Background/rationale         | 2      | Explain the scientific background and rationale for the investigation being reported                                                                                                 | 6-9                |
| Objectives                   | 3      | State specific objectives, including any prespecified hypotheses                                                                                                                     | 9                  |
| <b>Methods</b>               |        |                                                                                                                                                                                      |                    |
| Study design                 | 4      | Present key elements of study design early in the paper                                                                                                                              | 10                 |
| Setting                      | 5      | Describe the setting, locations, and relevant dates, including periods of recruitment, exposure, follow-up, and data collection                                                      | 10                 |
| Participants                 | 6      | (a) Give the eligibility criteria, and the sources and methods of selection of participants                                                                                          | 10                 |
| Variables                    | 7      | Clearly define all outcomes, exposures, predictors, potential confounders, and effect modifiers. Give diagnostic criteria, if applicable                                             | 10-11              |
| Data sources/<br>measurement | 8*     | For each variable of interest, give sources of data and details of methods of assessment (measurement). Describe comparability of assessment methods if there is more than one group | 10-11              |
| Bias                         | 9      | Describe any efforts to address potential sources of bias                                                                                                                            |                    |
| Study size                   | 10     | Explain how the study size was arrived at                                                                                                                                            | 12                 |
| Quantitative variables       | 11     | Explain how quantitative variables were handled in the analyses. If applicable, describe which groupings were chosen and why                                                         | 11                 |
| Statistical methods          | 12     | (a) Describe all statistical methods, including those used to control for confounding                                                                                                | 11                 |
|                              |        | (b) Describe any methods used to examine subgroups and interactions                                                                                                                  | 11-12              |
|                              |        | (c) Explain how missing data were addressed                                                                                                                                          |                    |
|                              |        | (d) If applicable, describe analytical methods taking account of sampling strategy                                                                                                   |                    |
|                              |        | (e) Describe any sensitivity analyses                                                                                                                                                |                    |
| <b>Results</b>               |        |                                                                                                                                                                                      |                    |

|                          |     |                                                                                                                                                                                                              |              |
|--------------------------|-----|--------------------------------------------------------------------------------------------------------------------------------------------------------------------------------------------------------------|--------------|
| Participants             | 13* | (a) Report numbers of individuals at each stage of study—eg numbers potentially eligible, examined for eligibility, confirmed eligible, included in the study, completing follow-up, and analysed            | Table 1      |
|                          |     | (b) Give reasons for non-participation at each stage                                                                                                                                                         | Table 1      |
|                          |     | (c) Consider use of a flow diagram                                                                                                                                                                           |              |
| Descriptive data         | 14* | (a) Give characteristics of study participants (eg demographic, clinical, social) and information on exposures and potential confounders                                                                     | Table 2      |
|                          |     | (b) Indicate number of participants with missing data for each variable of interest                                                                                                                          |              |
| Outcome data             | 15* | Report numbers of outcome events or summary measures                                                                                                                                                         | 15-16, Fig 1 |
| Main results             | 16  | (a) Give unadjusted estimates and, if applicable, confounder-adjusted estimates and their precision (eg, 95% confidence interval). Make clear which confounders were adjusted for and why they were included | Fig 2        |
|                          |     | (b) Report category boundaries when continuous variables were categorized                                                                                                                                    | 12-20        |
|                          |     | (c) If relevant, consider translating estimates of relative risk into absolute risk for a meaningful time period                                                                                             |              |
| Other analyses           | 17  | Report other analyses done—eg analyses of subgroups and interactions, and sensitivity analyses                                                                                                               |              |
| <b>Discussion</b>        |     |                                                                                                                                                                                                              |              |
| Key results              | 18  | Summarise key results with reference to study objectives                                                                                                                                                     | 20-24        |
| Limitations              | 19  | Discuss limitations of the study, taking into account sources of potential bias or imprecision. Discuss both direction and magnitude of any potential bias                                                   | 24           |
| Interpretation           | 20  | Give a cautious overall interpretation of results considering objectives, limitations, multiplicity of analyses, results from similar studies, and other relevant evidence                                   | 24-25        |
| Generalisability         | 21  | Discuss the generalisability (external validity) of the study results                                                                                                                                        | 25           |
| <b>Other information</b> |     |                                                                                                                                                                                                              |              |
| Funding                  | 22  | Give the source of funding and the role of the funders for the present study and, if applicable, for the original study on which the present article is based                                                | 26           |

\*Give information separately for cases and controls in case-control studies and, if applicable, for exposed and unexposed groups in cohort and cross-sectional studies.

**Note:** An Explanation and Elaboration article discusses each checklist item and gives methodological background and published examples of transparent reporting. The STROBE checklist is best used in conjunction with this article (freely available on the Web sites of PLoS Medicine at <http://www.plosmedicine.org/>, Annals of Internal Medicine at <http://www.annals.org/>, and Epidemiology at <http://www.epidem.com/>). Information on the STROBE Initiative is available at [www.strobe-statement.org](http://www.strobe-statement.org).

**Supplementary Table 1: Longitudinal associations between treatment intent and depression**

| HADS-D 7v8 |          |            | n=  | ≤7  | %    | ≥8 | %    | p value |
|------------|----------|------------|-----|-----|------|----|------|---------|
|            | Baseline | Radical    | 188 | 151 | 80.3 | 37 | 19.7 |         |
|            |          | Palliative | 91  | 64  | 70.3 | 27 | 29.7 | 0.088   |
|            | 3 months | Radical    | 136 | 96  | 70.6 | 40 | 29.4 |         |
|            |          | Palliative | 65  | 49  | 75.4 | 16 | 24.6 | 0.588   |
|            | 9 months | Radical    | 111 | 88  | 79.3 | 23 | 20.7 |         |
|            |          | Palliative | 45  | 36  | 80   | 9  | 20   | 1.0     |

| Mann Whitney U Test |          |     | n=  | Mean Rank Score | Md(IQR)   | U      | Z      | r     | Sig.   |
|---------------------|----------|-----|-----|-----------------|-----------|--------|--------|-------|--------|
| PHQ-9               | Baseline | BSA | 85  | 156.95          | 7(3:12)   |        |        |       |        |
|                     |          | BW  | 173 | 116.01          | 4(2:8)    | 5019   | -4.158 | -0.29 | 0.0005 |
|                     | 3 months | BSA | 49  | 112.64          | 9(5:12)   |        |        |       |        |
|                     |          | BW  | 136 | 85.92           | 5(2:8)    | 2369   | -3.003 | 0.22  | 0.003  |
|                     | 9 months | BSA | 28  | 84.32           | 4(2:10)   |        |        |       |        |
|                     |          | BW  | 115 | 69.00           | 3(1:7.5)  | 1265   | -1.767 | -0.14 | 0.077  |
| HADS-D              | Baseline | BSA | 94  | 166.43          | 5(2:10)   |        |        |       |        |
|                     |          | BW  | 185 | 126.57          | 3(1:6)    | 6211   | -3.919 | -0.23 | 0.0005 |
|                     | 3 months | BSA | 57  | 125.31          | 6.5(4:10) |        |        |       |        |
|                     |          | BW  | 144 | 91.38           | 4(2:7)    | 2718.5 | -3.742 | -0.26 | 0.0005 |
|                     | 9 months | BSA | 32  | 98.47           | 6(2:9)    |        |        |       |        |

|                               |              |         |         |            |              |            |                |               |            |
|-------------------------------|--------------|---------|---------|------------|--------------|------------|----------------|---------------|------------|
|                               |              | BW      | 12<br>4 | 73.35      | 3(1:7.5<br>) | 1345       | -<br>2.82<br>5 | -<br>0.2<br>5 | 0.005      |
| Depression<br>Thermomet<br>er | Baselin<br>e | BS<br>A | 84      | 147.5<br>1 | 3(0:6)       |            |                |               |            |
|                               |              | BW      | 18<br>0 | 125.5<br>0 | 1(0:4)       | 6299.<br>5 | -<br>2.24<br>9 | -<br>0.1<br>3 | 0.024      |
|                               | 3month<br>s  | BS<br>A | 51      | 119.7<br>2 | 4.5(1:6<br>) |            |                |               |            |
|                               |              | BW      | 13<br>8 | 85.87      | 1(0:3)       | 2258.<br>5 | -<br>3.87<br>7 | -<br>0.3<br>0 | 0.000<br>5 |
|                               | 9<br>months  | BS<br>A | 30      | 90.35      | 1(0:5)       |            |                |               |            |
|                               |              | BW      | 12<br>0 | 71.85      | 0(0:2)       | 1354.<br>5 | -<br>2.23<br>7 | -<br>0.1<br>8 | 0.025      |

**Supplementary Table 2: Ethnic differences in depressive symptoms**

**Supplementary Table 3: Longitudinal associations between coping strategies and depression (HADS D)**

| Mann<br>Whitney<br>U Test HADS<br>D 7v8 |              |        | n=      | Mea<br>n<br>Ran<br>k<br>Scor<br>e | Median<br>(IQR)   | U          | Z              | r        | p-<br>value |
|-----------------------------------------|--------------|--------|---------|-----------------------------------|-------------------|------------|----------------|----------|-------------|
| H/H                                     | Baseli<br>ne | N<br>D | 21<br>1 | 119.<br>09                        | 12(10:15)         |            |                |          |             |
|                                         |              | D      | 63      | 199.<br>17                        | 17.5(14:2<br>1.5) | 2761<br>.5 | -<br>7.06<br>5 | 0.4<br>2 | 0.000<br>5  |
|                                         | 3m           | N<br>D | 14<br>5 | 83.7<br>9                         | 11(9:15.5<br>)    |            |                |          |             |
|                                         |              | D      | 52      | 141.<br>41                        | 16.5(11:1<br>9)   | 1564<br>.5 | -<br>6.30<br>3 | 0.4      | 0.000<br>5  |
|                                         | 9m           | N<br>D | 11<br>7 | 65.8<br>7                         | 11(9:15)          |            |                |          |             |
|                                         |              | D      | 31      | 107.<br>08                        | 16(14:18)         | 803.<br>5  | -<br>4.80<br>2 | 0.3<br>9 | 0.000<br>5  |
| Cog.<br>Avoidance                       | Baseli<br>ne | N<br>D | 21<br>0 | 128.<br>22                        | 10(9:12)          |            |                |          |             |
|                                         |              | D      | 62      | 164.<br>56                        | 11(10:13)         | 4770<br>.5 | -<br>3.22<br>7 | 0.1<br>9 | 0.001       |
|                                         | 3m           | N<br>D | 14<br>4 | 95.4<br>1                         | 10(8:12)          |            |                |          |             |
|                                         |              | D      | 52      | 107.<br>05                        | 11(10:13)         | 3299<br>.5 | -<br>1.27<br>8 | 0.0<br>9 | 0.201       |
|                                         | 9m           | N<br>D | 11<br>7 | 71.8<br>6                         | 10(8:12)          |            |                |          |             |
|                                         |              | D      | 31      | 84.4<br>5                         | 11(9:12)          | 1505       | -<br>1.46<br>4 | 0.1<br>2 | 0.143       |
| Fatalism                                | Baseli<br>ne | N<br>D | 21<br>1 | 132.<br>59                        | 14(12:16)         |            |                |          |             |
|                                         |              | D      | 64      | 155.<br>85                        | 15.5(13:1<br>7)   | 5609<br>.5 | -<br>2.06<br>2 | 0.1<br>2 | 0.039       |
|                                         | 3m           | N<br>D | 14<br>5 | 96.0<br>7                         | 14(12:15)         |            |                |          |             |
|                                         |              | D      | 52      | 107.<br>16                        | 14(13:17)         | 3345<br>.5 | -<br>1.21<br>1 | 0.0<br>8 | 0.226       |
|                                         | 9m           | N      | 11      | 73.1                              | 14(12:15)         |            |                |          |             |

|                       |              |        |         |            |                   |            |                |          |            |
|-----------------------|--------------|--------|---------|------------|-------------------|------------|----------------|----------|------------|
|                       |              | D      | 7       | 9          |                   |            |                |          |            |
|                       |              | D      | 30      | 77.1<br>7  | 14(13:16)         | 1660       | -<br>.459      | 0.0<br>3 | 0.646      |
| Anx.<br>Preoccupation | Baseli<br>ne | N<br>D | 21<br>2 | 121.<br>09 | 20(17:23)         |            |                |          |            |
|                       |              | D      | 64      | 196.<br>18 | 25(22.5:2<br>7.5) | 3092<br>.5 | -<br>6.61<br>0 | 0.3<br>9 | 0.000<br>5 |
|                       | 3m           | N<br>D | 14<br>5 | 83.7<br>6  | 18(15:20.<br>5)   |            |                |          |            |
|                       |              | D      | 52      | 141.<br>41 | 24(22:26)         | 1559<br>.5 | -<br>6.27<br>8 | 0.4<br>4 | 0.000<br>5 |
|                       | 9m           | N<br>D | 11<br>7 | 76.6<br>5  | 18(15:21)         |            |                |          |            |
|                       |              | D      | 30      | 103.<br>08 | 23(18:26)         | 882.<br>5  | -<br>4.20<br>3 | 0.3<br>4 | 0.000<br>5 |
| Fighting Spirit       | Baseli<br>ne | N<br>D | 21<br>2 | 138.<br>95 | 13(12:14)         |            |                |          |            |
|                       |              | D      | 63      | 134.<br>80 | 13(11:14)         | 6476<br>.5 | -<br>.368      | 0.0<br>2 | 0.713      |
|                       | 3m           | N<br>D | 14<br>5 | 104.<br>56 | 13(10:14)         |            |                |          |            |
|                       |              | D      | 52      | 83.5<br>1  | 12(11:13)         | 2964<br>.5 | -<br>2.30<br>9 | 0.1<br>6 | 0.021      |
|                       | 9m           | N<br>D | 11<br>7 | 76.6<br>5  | 12(11:14)         |            |                |          |            |
|                       |              | D      | 31      | 66.4<br>0  | 12(10:13)         | 1562<br>.5 | -<br>1.19<br>2 | 0.0<br>9 | 0.233      |
| Denial                | Baseli<br>ne | N<br>D | 21<br>1 | 138.<br>33 | 13<br>(12:15)     |            |                |          |            |
|                       |              | D      | 64      | 136.<br>90 | 14<br>(12:16)     | 6681<br>.5 | -<br>.127      | 0.0<br>7 | 0.899      |
|                       | 3m           | N<br>D | 14<br>1 | 94.3<br>6  | 13(11.50:<br>15)  |            |                |          |            |
|                       |              | D      | 54      | 107.<br>5  | 14(11:16)         | 3294       | -<br>1.46<br>6 | 0.1<br>0 | 0.143      |
|                       | 9m           | N<br>D | 11<br>4 | 75.2<br>9  | 13(12:16)         |            |                |          |            |
|                       |              | D      | 30      | 61.9<br>2  | 13(10:14)         | 1392<br>.5 | -<br>1.57<br>3 | 0.1<br>3 | 0.116      |

D= depressive symptoms HADS  $\leq 7$

ND = depressive symptoms HADS  $\geq 8$



**Supplementary Table 4: Longitudinal associations between coping strategies and depression via PHQ-9**

| Mann Whitney U Test (PHQ-9 v10) |          |    | n = | Mean Rank Score (MRS) | Median (IQR) | U      | Z      | r    | p-value |
|---------------------------------|----------|----|-----|-----------------------|--------------|--------|--------|------|---------|
| Hopelessness /Helplessness      | Baseline | ND | 193 | 112.38                | 12(10:15.5)  |        |        |      |         |
|                                 |          | D  | 62  | 176.61                | 17(13:21)    | 2969   | -5.987 | 0.37 | 0.0005  |
|                                 | 3months  | ND | 134 | 76.02                 | 11(8:14)     |        |        |      |         |
|                                 |          | D  | 49  | 135.69                | 17(16:19)    | 1142   | -6.808 | 0.5  | 0.0005  |
|                                 | 9months  | ND | 116 | 63.98                 | 11(9:15.5)   |        |        |      |         |
|                                 |          | D  | 23  | 100.37                | 16.5(11:19)  | 635.5  | -3.998 | 0.34 | 0.0005  |
| Cognitive Avoidance             | Baseline | ND | 192 | 120.03                | 10(9:12)     |        |        |      |         |
|                                 |          | D  | 61  | 148.93                | 11(10:13)    | 4518.5 | -2.712 | 0.16 | 0.007   |
|                                 | 3months  | ND | 134 | 90.10                 | 10(8:12)     |        |        |      |         |
|                                 |          | D  | 49  | 97.20                 | 11(10:12)    | 3028   | -0.810 | 0.06 | 0.418   |
|                                 | 9months  | ND | 116 | 67.15                 | 10(8:12)     |        |        |      |         |
|                                 |          | D  | 23  | 84.37                 | 11(10:13)    | 1003.5 | -1.886 | 0.16 | 0.059   |
| Fatalism                        | Baseline | ND | 205 | 123.64                | 14(12:16)    |        |        |      |         |
|                                 |          | D  | 53  | 152.18                | 15(13:17)    | 4740.5 | -2.474 | 0.15 | 0.013   |
|                                 | 3months  | ND | 134 | 88.95                 | 14(12:16)    |        |        |      |         |
|                                 |          | D  | 49  | 100.35                | 14(13:16)    | 2874   | -1.297 | 0.09 | 0.15    |
|                                 | 9months  | ND | 116 | 67.81                 | 14(12:15)    |        |        |      |         |
|                                 |          | D  | 23  | 81.07                 | 15(13:1      | 107    | -      | 0.1  | 0.14    |

|                       |              |        |         |        |                  |            |                |               |            |
|-----------------------|--------------|--------|---------|--------|------------------|------------|----------------|---------------|------------|
|                       |              |        |         |        | 9)               | 9.5        | 1.4<br>51      | 2             | 7          |
| Anx.<br>Preoccupation | Basel<br>ine | N<br>D | 19<br>4 | 113.58 | 20(17:2<br>3)    |            |                |               |            |
|                       |              | D      | 62      | 175.19 | 24.5<br>(21:27)  | 311<br>9   | -<br>5.9<br>87 | 0.3<br>7      | 0.00<br>05 |
|                       | 3mon<br>ths  | N<br>D | 13<br>4 | 78.86  | 19(16:2<br>3)    |            |                |               |            |
|                       |              | D      | 49      | 127.94 | 24(21:2<br>7)    | 152<br>2   | -<br>5.5<br>59 | 0.4           | 0.00<br>05 |
|                       | 9mon<br>ths  | N<br>D | 11<br>6 | 62.86  | 18(15:2<br>0.5)  |            |                |               |            |
|                       |              | D      | 23      | 106    | 24(22:2<br>6)    | 506        | -<br>4.7<br>04 | 0.4           | 0.00<br>05 |
| Fighting Spirit       | Basel<br>ine | N<br>D | 19<br>4 | 130.87 | 13(12:1<br>4)    |            |                |               |            |
|                       |              | D      | 62      | 121.08 | 13(11:1<br>4)    | 555<br>4   | -<br>.91<br>6  | -<br>0.0<br>5 | 0.35<br>9  |
|                       | 3mon<br>ths  | N<br>D | 13<br>4 | 94.60  | 12(11:1<br>4)    |            |                |               |            |
|                       |              | D      | 49      | 84.90  | 12(11.1<br>3)    | 293<br>5   | -<br>1.1<br>09 | 0.0<br>8      | 0.26<br>8  |
|                       | 9mon<br>ths  | N<br>D | 11<br>6 | 70.43  | 12(10:1<br>4)    |            |                |               |            |
|                       |              | D      | 23      | 67.85  | 13(11:1<br>3)    | 128<br>4.5 | -<br>.28<br>3  | 0.0<br>2      | 0.77<br>7  |
| Denial (CIDQ)         | Basel<br>ine | N<br>D | 19<br>4 | 124.49 | 14<br>(12:15)    |            |                |               |            |
|                       |              | D      | 62      | 141.05 | 14.5<br>(12:17)  | 523<br>6   | -<br>1.5<br>42 | -<br>0.0<br>9 | 0.12<br>3  |
|                       | 3mon<br>ths  | N<br>D | 13<br>0 | 87.52  | 13(12:1<br>5)    |            |                |               |            |
|                       |              | D      | 49      | 96.58  | 14(12:1<br>5)    | 286<br>2.5 | -<br>1.0<br>51 | 0.0<br>7      | 0.29<br>3  |
|                       | 9mon<br>ths  | N<br>D | 11<br>4 | 68.82  | 12(11.5<br>0:15) |            |                |               |            |
|                       |              |        | 23      | 69.89  | 13(11:1<br>6)    | 129<br>0.5 | -<br>.11<br>9  | 0.0<br>1      | 0.90<br>5  |

ND = depressive symptoms PHQ-9  $\geq 10$

D= depressive symptoms PHQ-9  $\leq 9$

**Supplementary Table 5: Longitudinal associations between coping strategies and depressive symptoms via Depression Thermometer (E.T.)**

| Mann Whitney<br>DepT. 3v4      |              |        | n=      | Mean<br>Rank<br>Score<br>(MRS) | Md(IQR<br>)     | U          | Z              | r          | p-<br>value |
|--------------------------------|--------------|--------|---------|--------------------------------|-----------------|------------|----------------|------------|-------------|
| Hopelessness /<br>helplessness | Baseli<br>ne | N<br>D | 17<br>0 | 108.<br>52                     | 12(9:15)        |            |                |            |             |
|                                |              | D      | 92      | 173.<br>96                     | 16.5(13:<br>19) | 3913<br>.5 | -<br>6.69<br>8 | 0.41       | 0.000<br>5  |
|                                | 3mont<br>hs  | N<br>D | 11<br>8 | 81.4<br>9                      | 12(9:16)        |            |                |            |             |
|                                |              | D      | 68      | 114.<br>34                     | 15(12:1<br>9)   | 2595       | -<br>4.02<br>2 | 0.29       | 0.000<br>5  |
|                                | 9mont<br>hs  | N<br>D | 11<br>3 | 66.5<br>1                      | 11.5(9:1<br>5)  |            |                |            |             |
|                                |              | D      | 34      | 98.8<br>8                      | 15(12:1<br>7)   | 1075       | -<br>3.90<br>5 | 0.32       | 0.000<br>5  |
| Cognitive<br>Avoidance.        | Baseli<br>ne | N<br>D | 16<br>9 | 120.<br>10                     | 10(8:12)        |            |                |            |             |
|                                |              | D      | 91      | 149.<br>81                     | 11(10:1<br>2)   | 5932<br>.5 | -<br>3.06<br>7 | 0.19       | 0.002       |
|                                | 3mont<br>hs  | N<br>D | 11<br>7 | 90.5<br>1                      | 10(9:15)        |            |                |            |             |
|                                |              | D      | 68      | 97.2<br>9                      | 11(9:12)        | 3686<br>.5 | -<br>.838      | 0.06       | 0.402       |
|                                | 9mont<br>hs  | N<br>D | 11<br>3 | 73.9<br>2                      | 10(8:12)        |            |                |            |             |
|                                |              | D      | 34      | 74.2<br>6                      | 10(8:12)        | 1912       | -<br>.042      | 0.00<br>03 | 0.967       |
| Fatalism                       | Baseli<br>ne | N<br>D | 17<br>0 | 125.<br>88                     | 14(12:1<br>6)   |            |                |            |             |
|                                |              | D      | 92      | 141.<br>88                     | 14(13:1<br>6)   | 6865       | -<br>1.64<br>1 | 0.1        | 0.101       |
|                                | 3mont<br>hs  | N<br>D | 11<br>8 | 88.4<br>9                      | 13(12:1<br>5)   |            |                |            |             |
|                                |              | D      | 68      | 102.<br>19                     | 14(12.5:<br>16) | 3421       | -<br>1.68      | 0.12       | 0.092       |

|                     |          |    |     |        |             |        |         |       |        |
|---------------------|----------|----|-----|--------|-------------|--------|---------|-------|--------|
|                     |          |    |     |        |             |        | 4       |       |        |
|                     | 9months  | ND | 113 | 72.94  | 13(12:16)   |        |         |       |        |
|                     |          | D  | 34  | 77.53  | 14(13:16)   | 1801   | - .555  | 0.04  | 0.579  |
| Anx. Preoccupation. | Baseline | ND | 171 | 103.12 | 20(17:22)   |        |         |       |        |
|                     |          | D  | 92  | 185.68 | 24(22:27)   | 2927.5 | - 8.412 | 0.52  | 0.0005 |
|                     | 3months  | ND | 119 | 75.85  | 19(17:22)   |        |         |       |        |
|                     |          | D  | 68  | 125.76 | 24(21:27)   | 1886   | - 6.079 | 0.44  | 0.0005 |
|                     | 9months  | ND | 114 | 66.54  | 20(17:23)   |        |         |       |        |
|                     |          | D  | 34  | 101.19 | 24(21:27)   | 1030.5 | - 4.145 | 0.34  | 0.0005 |
| Fighting Spirit     | Baseline | ND | 171 | 132.79 | 13(11:14)   |        |         |       |        |
|                     |          | D  | 92  | 130.53 | 13(11.5:14) | 7731   | - 0.232 | 0.01  | 0.817  |
|                     | 3months  | ND | 119 | 93.64  | 13(11:14.5) |        |         |       |        |
|                     |          | D  | 68  | 94.63  | 13(11:14)   | 4003   | - .122  | 0.008 | 0.903  |
|                     | 9months  | ND | 114 | 77.39  | 13(11:15)   |        |         |       |        |
|                     |          | D  | 34  | 64.81  | 12(11:14)   | 1608.5 | - 1.518 | 0.12  | 0.129  |
| Denial (CIDQ)       | Baseline | ND | 172 | 132.44 | 14(12:15)   |        |         |       |        |
|                     |          | D  | 92  | 132.61 | 13.5(12:16) | 7901.5 | - 0.018 | 0.001 | 0.986  |
|                     | 3months  | ND | 119 | 90.95  | 13(12:15)   |        |         |       |        |
|                     |          | D  | 68  | 99.34  | 13(12:16)   | 3683   | - 1.026 | 0.06  | 0.305  |
|                     | 9months  | ND | 115 | 76.65  | 13(12:15)   |        |         |       |        |
|                     |          | D  | 34  | 69.41  | 13(11:15)   | 1765   | - .865  | 0.07  | 0.387  |

1  
2  
3 ND= depressive symptoms DepT  $\leq 3$

4  
5 D= depressive symptoms DepT  $\geq 4$

6  
7  
8  
9  
10  
11  
12  
13  
14  
15  
16  
17  
18  
19  
20  
21  
22  
23  
24  
25  
26  
27  
28  
29  
30  
31  
32  
33  
34  
35  
36  
37  
38  
39  
40  
41  
42  
43  
44  
45  
46  
47  
48  
49  
50  
51  
52  
53  
54  
55  
56  
57  
58  
59  
60

For peer review only
